# Supplementary material for: Global Transcriptome Analysis of Formalin-Fixed Prostate Cancer Specimens Identifies Biomarkers of Disease Recurrence
Source: Oxford University Press journal article supplement (doi:10.1158/0008-5472.can-13-2699), 2014-04-09
Supplement: 00085472can132699-sup-tab1.xlsx [file 00085472can132699-sup-tab1.xlsx]

## Sheet: Supplementary Table 1
Supplementary Table 1: Clinical characteristics of patients analyzed by RNAseq.
Category	BCR	NO BCR	TOTAL
VA	21	40	61
Toronto	25	4	29
Moffitt	3	7	10
AA	8	14	22
CA	17	31	48
Race NA	24	6	36
Gleason <7	4	7	11
Gleason 3+4	20	33	53
Gleason 4+3	14	8	22
Gleason >7	11	3	14
Total	49	51	100
pStage
pT1	9	3	12
pT2	27	42	69
pT3	11	4	15
pT4	1	0	1
Total	48	49	97
Average	BCR	NO BCR	TOTAL
Gleason	7.3	6.9	7.1
Months F/U	57	82.1	69.8
Age	61.8	60.5	61.1
Stage	2.1	2.1	2.1
PSA	14.7	7.4	11
