# Supplementary material for: Global Transcriptome Analysis of Formalin-Fixed Prostate Cancer Specimens Identifies Biomarkers of Disease Recurrence
Source: Oxford University Press journal article supplement (doi:10.1158/0008-5472.can-13-2699), 2014-04-09
Supplement: 00085472can132699-sup-tab2.xlsx [file 00085472can132699-sup-tab2.xlsx]

## Sheet: Supplementary Table 2
Supplementary Table 2: RNA-QC, sequencing, and clinical metadata on the 106 samples sequenced in this study.
CGSR ID	External ID	study ID	Concentration (ng/µl)	Ratio 260/280	Ratio 260/230	Total yield (µg)	Rpl13a Ct value	no. of uniquely mapped reads	no. of total reads	% mapped	Months to BCR	Months total F/U	BCR	Gleason Score	tgleason	age	prepsa	race	pSpTage
PT081	MCC-PT081	MCC-PT081	NA	NA	NA	NA	NA	251516583	399472616	0.629622	NA	119	0	347	7	78	NA	W	pT3
PT127	MCC-PT127	MCC-PT127	NA	NA	NA	NA	NA	9995053	15194156	0.657822	NA	114	0	336	6	61	7	W	pT2
PT168	MCC-PT168	MCC-PT168	NA	NA	NA	NA	NA	10476268	16221792	0.645814	NA	87	0	336	6	63	1.8	W	pT2
PT184	MCC-PT184	MCC-PT184	NA	NA	NA	NA	NA	20241959	30200054	0.670262	NA	98	0	347	7	58	8.2	NA	pT3
PT199	MCC-PT199	MCC-PT199	NA	NA	NA	NA	NA	13030802	20244858	0.64366	NA	69	0	347	7	57	5.02	W	pT2
PT236	MCC-PT236	MCC-PT236	NA	NA	NA	NA	NA	15108250	22822922	0.661977	NA	57	0	347	7	54	7.8	W	pT2
PT243	MCC-PT243	MCC-PT243	NA	NA	NA	NA	NA	20783424	33452206	0.621287	NA	50	0	347	7	43	6.6	NA	pT2
UTPC008	UTPC008	UTPC008	297.63	1.99	1.83		29.271	101038395	146440614	0.689962	NA	72	0	437	7	57	8	NA	pT1C
UTPC020	UTPC020	UTPC020	297.03	1.9	1.67		28.6155	48519295	85311334	0.568732	NA	85	0	448	8	66	29.73	NA	pT2B
UTPC107	UTPC107	UTPC107	350.34	1.87	1.64		30.4426	60698177	96754580	0.627342	NA	63	0	336	6	50	5.25	NA	pT1C
CM.1-0028.1	UTPC162	UTPC162	71.75	1.95	0.79	5.38125	29.1815	16673391	26114500	0.638473	NA	82	0	347	7	69	7.35	NA	pT1C
CM.4-0087	VA-PC-00-87	00LH1	60.87	1.99	0.76	4.88091	26.1493	58978596	80944386	0.728631	NA	69.4685	0	347	7	68.7589	6.25	B	pT2C
CM.4-0090	VA-PC-00-90	00JC1	33.76	1.93	0.4	2.88637	27.3775	26387543	56712230	0.465288	NA	67.989	0	347	7	55.5781	1.83	B	pT2
CM.4-0091	VA-PC-00-91	00AS1	17.04	1.81	0.21	1.45211	26.5084	29052523	43731408	0.66434	NA	62.3671	0	437	7	62.0904	5.72	W	pT2C
CM.4-0092	VA-PC-00-92	00ES1	72.01	1.87	0.82	5.81841	26.8547	53860194	76364672	0.705302	NA	59.5068	0	538	8	63.1096	13.92	B	pT3A
CM.4-0093	VA-PC-00-93	00CH1	102.02	1.92	1.04	8.75332	25.0329	95708411	119594960	0.800271	NA	50.4	0	347	7	52.4548	4.54	W	pT2A
CM.4-0094	VA-PC-00-94	00JB1	50.54	1.91	0.32	4.24179	26.3698	49844364	72127946	0.691055	NA	61.5452	0	347	7	62.3808	7.14	B	pT3A
CM.4-0095	VA-PC-00-95	00HA1	24.04	1.78	0.16	2.01863	28.9445	59522602	90030558	0.661138	NA	67.9233	0	347	7	68.9918	4.42	B	pT2C
CM.4-0097	VA-PC-00-97	00JJ2	130.18	1.93	0.77	11.4298	24.4507	81114085	105378444	0.769741	NA	64.2082	0	336	6	51.3753	4.74	W	pT2C
CM.4-0098	VA-PC-00-98	00JM1	28.76	1.79	0.42	2.59617	26.6307	30149534	41886224	0.719796	NA	63.5507	0	347	7	68.3671	8.19	W	pT2C
CM.4-0061	VA-PC-91-61	91HH1	67.41	1.91	0.69	5.3928	29.8676	39377172	79197750	0.497201	NA	2.30137	0	437	7	56.5699	3.7	W	pT2C
CM.4-0062	VA-PC-91-62	91EM1	141.12	1.93	0.9	11.2896	30.296	58589794	93107360	0.629271	NA	171.09	0	448	8	63.8329	2.9	W	pT2C
CM.4-0064	VA-PC-91-64	91HL1	53.47	2.02	0.7	4.65067	26.9107	50897494	63710732	0.798884	NA	48.6247	0	347	7	69.1342	4.9	W	pT2C
CM.4-0013	VA-PC-92-13	92GG1	48.41	1.91	0.69	4.25481	26.1338	9199337	13443226	0.68431	NA	160.274	0	347	7	64.9233	3.9	W	pT2A
CM.4-0014	VA-PC-92-14	92WM1	94.14	1.88	0.82	7.5312	28.7042	58111320	123916290	0.468956	NA	116.515	0	347	7	70.2137	4.61	W	pT2C
CM.4-0066	VA-PC-92-66	92LS1	29.22	2.01	0.48	2.57996	30.381	42010928	87983038	0.477489	NA	148.241	0	347	7	65.1123	9.17	W	pT2
CM.4-0067	VA-PC-92-67	92PG1	33.91	2.02	0.55	2.9773	28.9697	42716254	71046612	0.601243	NA	116.877	0	347	7	66.5534	6.6	W	pT2
CM.4-0019	VA-PC-93-19	93RS1	46.56	1.86	0.64	4.27677	26.9554	21723177	27119760	0.801009	NA	155.145	0	347	7	64.1315	17	W	pT2A
CM.4-0068	VA-PC-93-68	93CA1	40.44	2	0.6	3.58751	27.936	50028024	70901434	0.7056	NA	31.8247	0	437	7	61.2986	14.96	W	pT2C
CM.4-0028	VA-PC-94-28	94CD1	286.61	1.89	1.05	22.9288	29.8243	82057308	117376166	0.699097	NA	118.258	0	347	7	56.3096	15.9	B	pT2C
CM.4-0070	VA-PC-94-70	94JL1	37.35	2.08	0.47	3.27268	26.7262	66648540	91910734	0.725144	NA	106.619	0	347	7	69.6247	2.4	B	pT3A
CM.4-0045	VA-PC-96-45	96HH1	25.92	1.87	0.38	2.28362	26.3371	39787464	62116178	0.640533	NA	100.241	0	347	7	50.4301	3.8	W	pT3A
CM.4-0047	VA-PC-97-47	97RM1	46.12	1.83	0.67	4.09758	30.1059	16010891	81869344	0.195566	NA	95.9342	0	347	7	53.7425	5.31	W	pT2C
CM.4-0048	VA-PC-97-48	97EC1	42.86	1.91	0.66	3.80483	27.9794	39114735	65304766	0.598957	NA	96.6247	0	347	7	50.011	7.57	B	pT2C
CM.4-0049	VA-PC-97-49	97WT1	70.03	1.91	0.65	5.6024	28.8857	38014897	83903516	0.453079	NA	97.3479	0	336	6	64.2356	10.63	W	pT2A
CM.4-0050	VA-PC-97-50	97JS1	50.5	1.88	0.65	4.04	30.01	42286269	88543368	0.477577	NA	83.0137	0	347	7	60.5178	8	W	pT2A
CM.4-0051	VA-PC-97-51	97FH1	86.27	1.89	0.93	6.9016	29.3135	21954686	74819768	0.293434	NA	89.2932	0	437	7	57.3178	7.1	B	pT2B
CM.4-0052	VA-PC-97-52	97DS1	52.53	1.84	0.58	4.2024	30.8705	14877664	99888664	0.148942	NA	96.0986	0	437	7	63.9918	7.84	W	pT2C
CM.4-0074	VA-PC-97-74	97RS1	165.24	1.92	1.17	14.3759	29.8022	96287979	144564326	0.666056	NA	97.874	0	347	7	72.3726	12.56	W	pT2C
CM.4-0054	VA-PC-99-54	99RE1	120.63	1.66	0.56	9.6504	30.8502	49857683	71463718	0.697664	NA	70.3562	0	437	7	59.0192	4.85	W	pT2A
CM.4-0055	VA-PC-99-55	99BE1	183.99	1.76	0.74	14.7192	30.5464	47695326	93161306	0.511965	NA	69.8301	0	347	7	47.1808	6.63	B	pT2C
CM.4-0075	VA-PC-99-75	99WW1	18.13	2.27	0.29	1.62033	28.0866	91549024	187807960	0.487461	NA	64.3397	0	347	7	54.3945	8.69	W	pT2A
CM.4-0076	VA-PC-99-76	99TD1	43.05	1.98	0.65	3.90799	26.0882	45313892	82363536	0.550169	NA	82.2904	0	347	7	54.6548	7.22	W	pT2C
CM.4-0077	VA-PC-99-77	99AS1	52.68	1.99	0.74	4.5813	27.313	32490259	43257880	0.751083	NA	51.5178	0	336	6	55.9452	5.55	B	pT2A
CM.4-0078	VA-PC-99-78	99DH1	143.06	1.9	1.26	12.3407	28.464	64869418	86112328	0.753312	NA	71.9014	0	347	7	62.4356	5.27	B	pT2A
CM.4-0079	VA-PC-99-79	99CT1	52.75	2.04	0.74	4.4732	26.7632	31069486	39654268	0.783509	NA	76.8329	0	347	7	64.8082	5.72	W	pT2B
CM.4-0080	VA-PC-99-80	99LH1	129.39	2.01	1.18	11.1404	27.4371	82407763	137313040	0.600145	NA	73.8411	0	347	7	54.4027	5.37	B	pT2C
CM.4-0081	VA-PC-99-81	99LW1	19.51	2	0.31	1.69347	27.3112	32471983	45905090	0.707372	NA	55.6274	0	437	7	65.5671	8.77	W	pT2
CM.4-0082	VA-PC-99-82	99CC1	88.7	1.95	0.88	7.47916	28.8733	65045734	118237400	0.550128	NA	34.6849	0	347	7	62.4521	5.22	W	pT2C
CM.4-0083	VA-PC-99-83	99WM1	47.3	2.03	1.36	4.15294	26.5616	52536474	83965414	0.625692	NA	77.2603	0	347	7	50.3644	10.63	B	pT2A
CM.4-0084	VA-PC-99-84	99RR1	49.93	2.05	0.66	4.38978	26.5023	24586944	41567752	0.591491	NA	63.3534	0	336	6	64.6849	4.92	W	pT2A
PT197	MCC-PT197		NA	NA	NA	NA	NA	83866689	137631984	0.609355	26.4986	104.055	1	336	6	65.9726	6.1	W	pT1C
PT220	MCC-PT220		NA	NA	NA	NA	NA	72366520	167427236	0.432227	22.126	74.2356	1	336	6	61.2849	10.8	W	pT1C
PT264	MCC-PT264		NA	NA	NA	NA	NA	71163980	131689532	0.540392	154.225	180.559	1	325	5	60.1151	NA	W	NA
CM.1-0001.1	UTPC004	UTPC4	126.44	1.91	1.01	9.483	27.1302	73667210	125088072	0.588923	38.1667	38	1	549	9	71	7.2	NA	pT1C
UTPC004	UTPC004	UTPC004	603.77	1.95	1.86		25.5281	94148591	152910392	0.615711	38.1667	60	1	549	9	71	7.2	NA	pT1C
CM.1-0002.1	UTPC009	UTPC9	176.61	1.89	0.97	13.2458	29.7793	16891119	29955374	0.563876	23.0333	53	1	347	7	50	22.3	NA	pT2B
UTPC009	UTPC009	UTPC009	706.81	1.95	1.32		27.2542	95747467	166836094	0.573901	23.0333	68	1	347	7	50	22.3	NA	pT2B
CM.1-0003.1	UTPC019	UTPC19	172.89	1.86	1.07	12.9667	29.1789	59982964	109542098	0.547579	21.6333	84	1	437	7	64	5.98	NA	pT2A
UTPC019	UTPC019	UTPC019	606.04	2	1.67		27.0424	52303635	94879158	0.551266	21.6333	89	1	437	7	64	5.98	NA	pT2A
CM.1-0004.1	UTPC021	UTPC21	211.26	1.93	1.35	15.8445	29.4856	46997412	117694252	0.399318	27.6333	82	1	437	7	68	7	NA	pT1C
UTPC021	UTPC021	UTPC021	462.85	1.91	1.49		29.15	46997412	89032182	0.52787	27.6333	74	1	437	7	68	7	NA	pT1C
CM.1-0005.1	UTPC029	UTPC29	136.55	1.94	1.15	10.2413	28.5757	65468819	114519126	0.571685	18	43	1	347	7	58	5.6	W	pT2A
UTPC029	UTPC029	UTPC029	440.9	1.92	1.83		26.838	100596892	172308510	0.583818	18	64	1	347	7	58	5.6	NA	pT2A
CM.1-0006.1	UTPC034	UTPC34	95.78	1.85	0.85	7.1835	29.3915	18135372	43876620	0.413327	0	50	1	347	7	55	9	NA	pT2B
UTPC034	UTPC034	UTPC034	181.29	1.93	1.35		26.9322	111754397	179885276	0.621254	0	49	1	347	7	55	9	NA	pT2B
UTPC041	UTPC041	UTPC041	553.78	1.9	1.67		29.7512	95370297	150202416	0.634945	0	54	1	347	7	71	8.5	NA	pT1C
CM.1-0008.1	UTPC058	UTPC58	169.44	1.93	1.21	12.708	29.3857	17542055	40212246	0.436237	7.96667	128	1	347	7	65	6.5	NA	pT2B
CM.1-0012.1	UTPC088	UTPC88	62.45	1.8	0.7	4.68375	30.2917	25814843	42437224	0.608307	21.4333	116	1	336	6	62	7.3	NA	pT1C
CM.1-0013.1	UTPC093	UTPC93	172.48	1.95	1.26	12.936	30.1165	16692025	29347406	0.568773	0	102	1	347	7	58	5.3	NA	pT2A
CM.1-0015.1	UTPC099	UTPC99	113.28	1.89	1.13	8.496	28.7814	13757579	24788064	0.555008	0	26	1	459	9	67	4.07	NA	pT2B
CM.1-0016.1	UTPC101	UTPC101	218.05	1.97	1.36	16.3538	28.4977	75959530	137742040	0.551462	0	35	1	448	8	70	14.43	NA	pT3B
CM.1-0017.1	UTPC104	UTPC104	222.64	1.96	1.31	16.698	28.5959	75764019	128654064	0.588897	0	88	1	437	7	59	3.86	NA	pT2A
CM.1-0018.1	UTPC110	UTPC110	82.3	1.78	0.73	6.1725	30.3893	25416364	37816666	0.672094	43.3667	75	1	549	9	53	19.9	NA	pT2B
CM.1-0019.1	UTPC114	UTPC114	69.53	1.95	0.8	5.21475	26.4937	64266720	101087258	0.635755	29.8333	43	1	347	7	60	7.2	NA	pT1C
CM.1-0020.1	UTPC116	UTPC116	173.51	1.94	1.3	13.0132	29.8938	20810790	30127252	0.690763	48.5	49	1	347	7	60	27	NA	pT2A
CM.1-0021.1	UTPC127	UTPC127	117.08	1.91	1.02	8.781	27.2601	86871782	135853972	0.63945	29.9333	61	1	437	7	58	9	NA	pT3B
CM.1-0022.1	UTPC131	UTPC131	129.62	1.92	1.09	9.7215	30.1655	18275411	28393284	0.643653	0	100	1	437	7	51	25	NA	pT3B
CM.1-0023.1	UTPC132	UTPC132	61.75	1.86	0.68	4.63125	29.4291	31782258	66452532	0.47827	27.6	101	1	437	7	65	13	NA	pT2A
CM.1-0025.1	UTPC141	UTPC141	338.15	1.96	1.56	25.3612	28.3118	57654792	118237400	0.487619	18.2333	79	1	347	7	74	23.9	NA	pT2A
CM.1-0026.1	UTPC146	UTPC146	73.43	1.81	0.67	5.50725	29.6584	34232839	68748780	0.497941	0	112	1	448	8	72	9.7	W	pT3B
CM.1-0027.1	UTPC147	UTPC147	219.21	1.96	1.36	16.4408	29.4779	17789548	29595182	0.601096	49.5333	125	1	347	7	66	6.5	NA	pT2A
UTPC160	UTPC160	UTPC160	405.54	1.87	1.67		29.3821	32943917	116678112	0.282349	27.4667	112	1	347	7	57	8.27	NA	pT1C
UTPC164	UTPC164	UTPC164	757.53	1.99	1.85		28.2192	123211885	201380054	0.611838	0	72	1	437	7	66	15.84	NA	pT2A
CM.1-0030.1	UTPC170	UTPC170	113.4	1.9	0.99	8.505	27.8805	70019189	106116046	0.659836	9.63333	36	1	437	7	72	13.03	NA	pT1C
CM.4-0086	VA-PC-00-86	00TW1	56.03	1.95	0.71	4.70734	26.6144	100294010	129843158	0.772424	26.5644	26.5644	1	437	7	59.6219	4.9	B	pT3B
CM.4-0088	VA-PC-00-88	00JS1	93.33	1.96	0.92	7.97437	26.6122	94922445	138978248	0.683002	1.57808	1.57808	1	347	7	53.4877	25.88	B	pT2C
CM.4-0096	VA-PC-00-96	00DF1	153.57	1.94	0.86	13.4834	26.7161	102465236	155745294	0.657903	3.64932	3.64932	1	437	7	58.4384	6.68	W	pT2C
CM.4-0099	VA-PC-00-99	00AR1	52.49	1.89	0.73	4.93205	26.0172	67659170	90703994	0.745934	26.6301	26.6301	1	437	7	65.7452	18.03	B	pT3A
CM.4-0004	VA-PC-90-4	90GD1	214.91	1.93	1.32	17.1928	28.3645	79371670	126005324	0.629907	36	36	1	448	8	59	NA	NA	pT3B
CM.4-0065	VA-PC-91-65	91JP1	187.28	1.86	1.32	16.2232	28.6743	62526982	86029578	0.726808	0.723288	0.723288	1	459	9	54.9671	72.6	B	pT3B
CM.4-0011	VA-PC-92-11	92AC1	122.65	1.88	1.05	10.7687	29.4715	91714533	148368488	0.618154	0.789041	0.789041	1	448	8	63.8575	65	W	pT3B
CM.4-0009	VA-PC-92-9	92HM1	71.15	1.91	0.61	6.24697	30.7308	37147471	78025110	0.476096	3.61644	3.61644	1	347	7	67.3836	40.5	W	pT3B
CM.4-0020	VA-PC-93-20	93JM1	93.42	1.89	0.92	8.2957	27.2002	74903758	99607176	0.751992	0.986301	0.986301	1	448	8	51.9863	12.8	W	pT2C
CM.4-0021	VA-PC-93-21	93AS1	177.56	1.97	1.06	15.0571	30.6915	73477400	112486354	0.653212	95.0137	95.0137	1	347	7	66.5123	6.2	W	pT2C
CM.4-0024	VA-PC-93-24	93FC1	36.01	1.91	0.51	3.1897	28.3278	34139269	76165456	0.448225	18.2795	18.2795	1	437	7	66.5644	20.2	W	pT2
CM.4-0071	VA-PC-94-71	94JH1	47.31	1.93	0.6	4.06251	26.2796	59808026	80420126	0.743695	1.61096	1.61096	1	448	8	64.7808	14.8	W	pT2C
CM.4-0034	VA-PC-95-34	95CM1	57.12	2.04	0.63	4.84378	29.9239	30409790	62706238	0.484956	3.51781	3.51781	1	347	7	61.9918	17.2	W	pT2C
CM.4-0037	VA-PC-95-37	95BB1	66.76	1.93	0.77	5.86153	27.8245	50090466	80399890	0.623017	60.526	60.526	1	347	7	57.6849	5.6	B	pT2C
CM.4-0041	VA-PC-95-41	95HD1	42.2	1.81	0.53	3.587	29.95	48679745	86453316	0.563076	101.063	101.063	1	347	7	57.9945	6.5	B	pT2C
CM.4-0042	VA-PC-95-42	95CJ1	94.99	1.87	0.58	7.5992	30.9424	23750742	46548402	0.510238	11.8356	11.8356	1	347	7	66.8329	14.5	W	pT4
CM.4-0043	VA-PC-96-43	96JL1	149.81	1.93	1.11	11.9848	30.5893	84811432	138708238	0.611438	48.8877	48.8877	1	437	7	61.7589	9.1	W	pT2C
CM.4-0044	VA-PC-96-44	96DC1	107.26	1.95	1.02	8.5808	27.8376	70792590	114205668	0.619869	26.0055	26.0055	1	347	7	51.7781	3	B	pT2C
CM.4-0046	VA-PC-97-46	97RC1	182.77	2.01	1.15	15.8644	28.8055	71695143	121983482	0.587745	2.79452	2.79452	1	437	7	58.6466	29.3	W	pT2C
CM.4-0053	VA-PC-98-53	98RS2	156.33	1.77	0.67	12.5064	29.2949	85477421	127724002	0.669235	2.20274	2.20274	1	448	8	61.5507	11.16	B	pT2A
CM.4-0085	VA-PC-99-85	99JH1	122.76	1.91	1.05	10.1891	29.2986	96977746	119105608	0.814216	39.9123	39.9123	1	347	7	56.8712	4.96	W	pT3A
