# Supplementary material for: Global Transcriptome Analysis of Formalin-Fixed Prostate Cancer Specimens Identifies Biomarkers of Disease Recurrence
Source: Oxford University Press journal article supplement (doi:10.1158/0008-5472.can-13-2699), 2014-04-09
Supplement: 00085472can132699-sup-tab3.xlsx [file 00085472can132699-sup-tab3.xlsx]

## Sheet: Supplementary Table 3
Supplementary Table 3: Summary of sequencing statistics from RNAseq analysis of 106 FFPE RNA samples.
Summary Statistics
Total Sequence (bp)	489894611900
Total Mapped Sequence (bp)	293704372350
Total Mapped Reads	5874087447
Average Total reads/sample	92432946
Average Mapped reads/sample	55415919
Median mapped reads/sample	51600565
Median % mapped reads/sample	0.621
Coverage/sample	34.2x
