# Supplementary material for: Global Transcriptome Analysis of Formalin-Fixed Prostate Cancer Specimens Identifies Biomarkers of Disease Recurrence
Source: Oxford University Press journal article supplement (doi:10.1158/0008-5472.can-13-2699), 2014-04-09
Supplement: 00085472can132699-sup-tab4.xlsx [file 00085472can132699-sup-tab4.xlsx]

## Sheet: Supplementary Table 4
Supplementary Table 4: Prediction Model based on Clinical Variables alone, namely, tGleason score, Log(prePSA + ), pStage, Surgical Margin Status, and Age.
Clinical variables	Coefficient
Gleason	0.297824
Log(prepsa+1)	0.794771
age	0.026732
SMS = Positive	1.13799
Pstg>2	0.220703
Supplementary Table 4: Prediction Model based on Clinical Variables alone.
In this and other tables, the coefficient estimates are obtained from Cox Proportional Hazards models; positive values mean that high marker values lead to higher risk of BCR.
