# Supplementary material for: Global Transcriptome Analysis of Formalin-Fixed Prostate Cancer Specimens Identifies Biomarkers of Disease Recurrence
Source: Oxford University Press journal article supplement (doi:10.1158/0008-5472.can-13-2699), 2014-04-09
Supplement: 00085472can132699-sup-tab5.xlsx [file 00085472can132699-sup-tab5.xlsx]

## Sheet: Supplementary Table 5
Supplementary Table 5: Set of 894 genes with a univariate CoxPH q-value < 0.10 that were subjected to pathway enrichment and upstream analyses using Ingenuity Pathway Analysis (IPA).
SYMBOL	p.value_COX	q.value
LYZ	1.40281e-07	0.000344934
LOC284801	9.85765e-07	0.00121194
SCARNA12	6.16879e-06	0.00505613
RGS1	2.89823e-05	0.016805
PNISR	4.04902e-05	0.016805
CDC37L1	5.2463e-05	0.016805
GNRHR2	5.64483e-05	0.016805
SREK1	6.0854e-05	0.016805
SIRT1	6.24966e-05	0.016805
CHD1	7.7491e-05	0.016805
MTRNR2L2	7.75509e-05	0.016805
SRSF1	8.35742e-05	0.016805
AKIRIN1	8.90921e-05	0.016805
INTS6	9.56811e-05	0.016805
NFAT5	0.000119265	0.0195507
PRPF38A	0.000146605	0.0203252
EIF2D	0.000150636	0.0203252
HIST1H1C	0.000151306	0.0203252
FAM134A	0.000157054	0.0203252
CCNT2	0.000171631	0.0211011
TERC	0.00018317	0.0214474
ZNF506	0.000199671	0.0223168
SYNCRIP	0.000230452	0.0232416
PTBP2	0.000245875	0.0232416
CNPY3	0.000254558	0.0232416
ERBB2	0.000263161	0.0232416
FAM18B2	0.000291974	0.0232416
COL3A1	0.000293937	0.0232416
DNAJC21	0.000304015	0.0232416
SNORA74B	0.000304773	0.0232416
XPO6	0.000311515	0.0232416
PIK3C2A	0.000318825	0.0232416
MIR663B	0.000320606	0.0232416
FLJ31306	0.000338819	0.0232416
TRIM38	0.000349442	0.0232416
INO80D	0.000366012	0.0232416
C3orf64	0.00037462	0.0232416
PPTC7	0.000380218	0.0232416
SCAMP2	0.000385155	0.0232416
SYNM	0.000386901	0.0232416
CERS4	0.000387534	0.0232416
ZNF292	0.000411581	0.023847
ALCAM	0.000417026	0.023847
N4BP2L2	0.000437067	0.024425
BCLAF1	0.000447949	0.0244768
HIST1H4H	0.000458071	0.0244858
DIS3	0.000471714	0.0246785
IFT57	0.000509026	0.0256927
VPS25	0.000511997	0.0256927
RMRP	0.00054575	0.0265931
JAG1	0.000552935	0.0265931
FDPS	0.000562385	0.0265931
RC3H1	0.000583596	0.0270754
UFM1	0.000604509	0.0275263
NR3C1	0.00061839	0.0276464
REV3L	0.000645094	0.0283253
SMG6	0.000661883	0.0285526
LOC646719	0.000710292	0.0300101
CTSD	0.000732789	0.0300101
LOC100505648	0.000747954	0.0300101
LRP6	0.000754313	0.0300101
ZNF662	0.000768594	0.0300101
KCTD9	0.000768897	0.0300101
PKN2	0.000814367	0.0312881
MTUS1	0.000895062	0.0325561
RPPH1	0.000907234	0.0325561
LPAR6	0.000919407	0.0325561
MED4	0.000925802	0.0325561
RUFY2	0.000928005	0.0325561
FAM98B	0.000947427	0.0325561
RASA1	0.00097058	0.0325561
BTG2	0.000975015	0.0325561
MYLK	0.000975789	0.0325561
ASCC3	0.00098186	0.0325561
PARM1	0.000996553	0.0325561
ERBB2IP	0.00102295	0.0325561
EPM2AIP1	0.00103108	0.0325561
ZDHHC17	0.00103273	0.0325561
ZRANB2	0.0010564	0.0326804
ZNF512	0.00106753	0.0326804
ZDHHC21	0.00107655	0.0326804
LOC400550	0.00113115	0.033241
ZMYM2	0.00114539	0.033241
FAM190B	0.00115369	0.033241
SATB1	0.00115929	0.033241
SGSM3	0.00118598	0.033241
IGFBP3	0.00120672	0.033241
ZBTB5	0.00120741	0.033241
PDE4D	0.0012124	0.033241
DHCR24	0.00122027	0.033241
HKR1	0.0012302	0.033241
SNORA7B	0.00125239	0.0332774
HIST1H2BG	0.00125862	0.0332774
MCM9	0.00132698	0.0337717
LUST	0.00139883	0.0337717
ZFAND6	0.00142159	0.0337717
CHRDL1	0.00142209	0.0337717
LRCH1	0.00142977	0.0337717
TSTD2	0.00143637	0.0337717
MAGED2	0.00143655	0.0337717
KIAA0564	0.00144378	0.0337717
PSIP1	0.00144566	0.0337717
COL1A1	0.00144855	0.0337717
PRDX4	0.00145423	0.0337717
KIAA0232	0.00145499	0.0337717
SRSF10	0.00146758	0.0337717
VPS36	0.0014696	0.0337717
AP3M1	0.00148841	0.0338875
IL6ST	0.00152615	0.0341184
CHPF	0.00153827	0.0341184
ABCA5	0.00154679	0.0341184
SLMAP	0.00155406	0.0341184
MIR22HG	0.00159638	0.0347374
SYNPO2	0.00163333	0.0350061
SLC7A6	0.00165259	0.0350061
PNRC1	0.00166553	0.0350061
ZNF548	0.00166568	0.0350061
ZC3H14	0.00168556	0.0351238
RHOBTB3	0.00170787	0.0352897
SND1	0.00176463	0.0358995
PARP11	0.00176675	0.0358995
NFIA	0.00178118	0.0358995
MKLN1	0.00180684	0.0361205
GGCX	0.00184693	0.036589
FAM8A1	0.00186004	0.036589
LOC283624	0.0019008	0.0370941
MAPK1IP1L	0.00192329	0.0371907
ZNF331	0.001936	0.0371907
RLIM	0.00199169	0.0372286
ATG5	0.00200053	0.0372286
SAR1A	0.00200417	0.0372286
MBNL2	0.00200484	0.0372286
BNIP2	0.00201367	0.0372286
TUB	0.00203851	0.0372803
FEM1C	0.00207046	0.0372803
XPA	0.00207974	0.0372803
SYNJ2BP	0.00208174	0.0372803
ARRDC3	0.00209228	0.0372803
NSMCE1	0.00212698	0.037369
HOOK3	0.00212765	0.037369
ZNF655	0.00219093	0.0381565
SCYL1	0.00221031	0.0381565
RLF	0.00223598	0.0381565
DMTF1	0.00226269	0.0381565
SFPQ	0.00226984	0.0381565
STK17A	0.00227998	0.0381565
RPL23AP53	0.00228111	0.0381565
PSD4	0.00234678	0.0389275
DDX3Y	0.00235887	0.0389275
ATAD1	0.00239459	0.0391873
PPIG	0.00241534	0.0391873
PJA2	0.00242242	0.0391873
SPOP	0.00250462	0.0400686
HIST1H2AC	0.00250949	0.0400686
KLF10	0.00259298	0.0407957
FBXW2	0.00260189	0.0407957
C8orf42	0.0026048	0.0407957
TMEM14E	0.00265496	0.040962
PRPF4B	0.00265531	0.040962
KLF9	0.00268157	0.040962
SNORD94	0.00268558	0.040962
TTC19	0.00269871	0.040962
MIER3	0.00286032	0.0431485
TMC4	0.00294548	0.0441623
RIT1	0.00297933	0.0443991
CYLD	0.00312436	0.0462799
LIMD1	0.00317148	0.0464914
X5.Mar	0.00319425	0.0464914
NUDT21	0.00319536	0.0464914
CHMP1B	0.00324526	0.0469397
SMARCA5	0.00332973	0.0474582
MDH2	0.00335666	0.0474582
RPAP2	0.00335699	0.0474582
ATF6B	0.00335832	0.0474582
NDE1	0.00346081	0.0486272
GOPC	0.00349736	0.0486728
GPRASP1	0.00352375	0.0486728
ZNF644	0.00354825	0.0486728
GPBP1	0.00357592	0.0486728
AMD1	0.00358195	0.0486728
LLPH	0.00358395	0.0486728
ABCC5	0.00361908	0.0486728
SCAF1	0.00363145	0.0486728
YTHDC2	0.00364221	0.0486728
SLC44A2	0.00367143	0.048798
BTF3L4	0.00379461	0.0500768
ZNF841	0.00383448	0.0500768
AASS	0.00387153	0.0500768
CYCS	0.00387728	0.0500768
NUFIP2	0.00390951	0.0500768
CYB5D1	0.00391288	0.0500768
KANSL1L	0.00391393	0.0500768
TBC1D16	0.00398629	0.0500768
SERINC1	0.00399005	0.0500768
MALAT1	0.00399681	0.0500768
FOXF1	0.00400231	0.0500768
ENTPD4	0.00403173	0.0500768
REEP3	0.00403239	0.0500768
ZNF33A	0.00407596	0.0501009
HCG18	0.00407759	0.0501009
SNORA20	0.00409546	0.0501009
SBDS	0.00412763	0.0502445
SEC63	0.00417073	0.050519
METTL21A	0.00422402	0.0509138
GK5	0.00426249	0.0510743
FXC1	0.00427888	0.0510743
ZNF532	0.00438664	0.0519399
PRPF38B	0.00439365	0.0519399
QSER1	0.00444787	0.0522493
ATMIN	0.00446232	0.0522493
NUP153	0.00453091	0.0525658
EGR3	0.00453211	0.0525658
RDX	0.00457657	0.0528323
TUFM	0.00461959	0.0528661
PLXNB2	0.0046225	0.0528661
DCUN1D4	0.00466563	0.0531124
LATS1	0.00470905	0.0533596
BNIP3L	0.00474991	0.0534736
PTN	0.00476261	0.0534736
SLAIN2	0.00481715	0.0538392
B3GALNT2	0.00483895	0.0538392
BGN	0.00495669	0.0543691
MPDZ	0.00496278	0.0543691
KPNA4	0.00496387	0.0543691
C1orf55	0.00498219	0.0543691
MINK1	0.00501595	0.0543691
SRSF11	0.00501925	0.0543691
PRPF19	0.00508315	0.0548197
PNN	0.00512271	0.0548747
FOXO1	0.00515473	0.0548747
SNORA57	0.00515633	0.0548747
CACNB2	0.00517751	0.0548747
TSPYL2	0.00520457	0.0549247
BTAF1	0.0052724	0.0550031
UBN2	0.00527256	0.0550031
NFIB	0.0052791	0.0550031
ZNF518A	0.00532601	0.0552577
COQ7	0.00537092	0.0553522
TIA1	0.00538014	0.0553522
CSK	0.0054105	0.0554326
SYS1	0.00550031	0.0560962
CLOCK	0.0056033	0.0560962
EGR1	0.00560515	0.0560962
PGD	0.00564068	0.0560962
MLH3	0.00564801	0.0560962
MRPS34	0.00564836	0.0560962
MDM4	0.00566067	0.0560962
AP2M1	0.00566252	0.0560962
SRSF6	0.0056806	0.0560962
ITPR1	0.00572842	0.0562093
FKBP1AP1	0.00573776	0.0562093
RAP1B	0.00577902	0.0562359
RPS19	0.00580088	0.0562359
FTL	0.00583081	0.0562359
TEAD1	0.00583196	0.0562359
CDC42EP3	0.005878	0.0562775
PPP1R12A	0.00588832	0.0562775
SNORA10	0.00592601	0.0562775
DDX3X	0.00592782	0.0562775
THAP9.AS1	0.00597002	0.056287
MIR143HG	0.00599089	0.056287
CPSF6	0.0059975	0.056287
FBLIM1	0.00603711	0.0564433
FRMD4A	0.00611347	0.0566719
TET2	0.00616117	0.0566719
ARIH1	0.00616904	0.0566719
GNPTG	0.00617913	0.0566719
FAM60A	0.00621381	0.0566719
SUB1	0.00621803	0.0566719
UBE2J1	0.00622492	0.0566719
SRSF3	0.00624594	0.0566719
LYSMD3	0.00640802	0.0573928
SYMPK	0.00650312	0.0573928
YTHDC1	0.00652514	0.0573928
KIAA1737	0.00653917	0.0573928
TMEM109	0.0065765	0.0573928
LUC7L3	0.00658167	0.0573928
LY6G5B	0.0066075	0.0573928
FLJ33630	0.00661999	0.0573928
ATF3	0.00663244	0.0573928
HNRNPU.AS1	0.00665328	0.0573928
MAOA	0.0066595	0.0573928
S100PBP	0.00667934	0.0573928
BIRC2	0.00668801	0.0573928
PGM5	0.0067076	0.0573928
KLHDC5	0.00671515	0.0573928
ZNF587B	0.00671747	0.0573928
ABI2	0.00672219	0.0573928
RBM4B	0.00681941	0.0574353
ARMCX4	0.00681967	0.0574353
EIF3J	0.00682618	0.0574353
PPM1A	0.00684164	0.0574353
ARMC8	0.00684396	0.0574353
UBE3A	0.00689408	0.0576591
SPTBN2	0.00697551	0.0579133
RPL13	0.00700833	0.0579133
SACM1L	0.00702863	0.0579133
SLC38A1	0.00704049	0.0579133
DAP3	0.00706154	0.0579133
MIR100HG	0.00707257	0.0579133
ZNF562	0.00712739	0.0579133
MTMR10	0.00715674	0.0579133
TRIM33	0.00716824	0.0579133
MOB4	0.00723335	0.0579133
IGF1	0.00723477	0.0579133
SLC25A46	0.00724804	0.0579133
AP2A1	0.0072569	0.0579133
PIK3R1	0.0072722	0.0579133
WIPI2	0.00732774	0.0579133
LOC100128338	0.00735542	0.0579133
WBP2	0.00740104	0.0579133
SIAH1	0.00741798	0.0579133
RNF6	0.00743393	0.0579133
ORC2	0.00744069	0.0579133
VAMP8	0.00745328	0.0579133
ATP6V0E2	0.00753264	0.0579133
NEBL	0.00753922	0.0579133
PCM1	0.00755506	0.0579133
SLC2A4RG	0.00757478	0.0579133
LOC440300	0.00758688	0.0579133
ATP1A1OS	0.00758991	0.0579133
TADA3	0.00760018	0.0579133
SUMO1P3	0.00762771	0.0579133
SORBS1	0.00765404	0.0579133
HIST1H2BK	0.00766527	0.0579133
TRA2B	0.00767941	0.0579133
NAE1	0.00770951	0.0579133
AK3	0.00777321	0.0579133
RPS20	0.00777343	0.0579133
MLL5	0.00779255	0.0579133
TRAP1	0.00779592	0.0579133
ATXN7	0.00783014	0.0579568
RHBDD1	0.00784891	0.0579568
BLOC1S1	0.007878	0.0579974
ANKRD12	0.00801901	0.0587338
PIAS2	0.00802918	0.0587338
RNF38	0.00809391	0.0587338
CAPN7	0.0080997	0.0587338
LBH	0.00812626	0.0587338
SNORA52	0.00813795	0.0587338
PSAP	0.00818248	0.0587338
GAS5.AS1	0.00823717	0.0587338
RIMKLB	0.00824444	0.0587338
CKS1B	0.00824517	0.0587338
GOSR1	0.00827736	0.0587338
TMX3	0.00829554	0.0587338
PABPC1	0.008302	0.0587338
MAT2A	0.00831244	0.0587338
HSPB8	0.00837061	0.0588531
ZFP36	0.00837719	0.0588531
BAZ1A	0.00841354	0.0589401
KIF2A	0.00847645	0.0591999
MTRNR2L4	0.00849878	0.0591999
TPM1	0.00868996	0.0601039
AKR1A1	0.00870928	0.0601039
STX17	0.00872536	0.0601039
SNORA74A	0.0087326	0.0601039
FAM174B	0.00876165	0.0601039
TPGS2	0.00877522	0.0601039
SFRP2	0.00884171	0.0603911
HMG20B	0.00888402	0.0604328
ZBED6	0.00891048	0.0604328
PSMD4	0.00894307	0.0604328
INPP5F	0.00894613	0.0604328
CLPTM1L	0.00898427	0.0605242
RSRC2	0.00909052	0.0610727
PRPF40A	0.00914812	0.0612921
TAF9B	0.00920316	0.0614933
HIPK3	0.00924943	0.061635
PLDN	0.00933178	0.0620158
PHC3	0.0094122	0.0622803
LOC100507577	0.00942224	0.0622803
MOB1B	0.00947913	0.0624883
LOC646329	0.00952114	0.0625974
SFRP4	0.00959106	0.0627834
KRAS	0.00962287	0.0627834
RICTOR	0.00962643	0.0627834
SMAD3	0.0096694	0.0627834
RNF138	0.0096771	0.0627834
MYH11	0.00970657	0.0628089
USP12	0.00979171	0.0631645
TMEM141	0.00982174	0.0631645
AEBP1	0.00983858	0.0631645
HNRNPA3	0.00987803	0.063197
KIAA0947	0.00992349	0.063197
LRRFIP1	0.0099368	0.063197
RHOB	0.00995284	0.063197
MAP1LC3B	0.00997509	0.063197
TTC14	0.0100077	0.063197
SNORD22	0.0100297	0.063197
RHOQ	0.0100493	0.063197
TNS3	0.0100838	0.0632523
TPM3	0.0101947	0.0636619
ITFG1	0.0102009	0.0636619
PRPF3	0.0102748	0.0638418
JAZF1	0.0103385	0.0638418
HERC2P4	0.0103487	0.0638418
ETNK1	0.0103748	0.0638418
PFN1P2	0.0103759	0.0638418
MAML2	0.0103929	0.0638418
EIF5	0.0104757	0.0638418
FIS1	0.0104822	0.0638418
ATF4	0.0105017	0.0638418
GPX1	0.0105212	0.0638418
VCL	0.0105859	0.0638418
TARDBP	0.0106213	0.0638418
TXLNG2P	0.0106249	0.0638418
MTX3	0.0106257	0.0638418
SLC15A2	0.0106276	0.0638418
TIAL1	0.0106451	0.0638418
MXI1	0.0106939	0.0639502
SLK	0.0107152	0.0639502
ZNF135	0.0107837	0.0642033
DNAJB14	0.0108966	0.0643678
TBC1D9B	0.0109942	0.0643678
SRP19	0.0110239	0.0643678
TRA2A	0.0110253	0.0643678
IFITM3	0.0110344	0.0643678
WSB1	0.0110423	0.0643678
VEZF1	0.0110513	0.0643678
MTERFD3	0.0110521	0.0643678
CLK4	0.0110714	0.0643678
KIAA1919	0.0110731	0.0643678
AKAP11	0.0111983	0.0649421
COL1A2	0.0112385	0.0650215
APH1A	0.0112743	0.0650759
FAM134C	0.0113047	0.0650792
USP47	0.0113872	0.0650792
FAM105B	0.0115096	0.0650792
TNPO1	0.0115133	0.0650792
OAT	0.0115219	0.0650792
PLAC4	0.0115385	0.0650792
RAP1A	0.0115641	0.0650792
MIER1	0.0116014	0.0650792
LOC401321	0.0116167	0.0650792
TPM4	0.0116524	0.0650792
SNORD10	0.0116711	0.0650792
H2AFJ	0.0116884	0.0650792
MRPL24	0.0117007	0.0650792
DPP4	0.0117094	0.0650792
ZNF397	0.0117494	0.0650792
MTOR	0.0117526	0.0650792
ZNF264	0.0117669	0.0650792
ATG14	0.0117874	0.0650792
SNTB2	0.0118039	0.0650792
MTRF1L	0.0118042	0.0650792
SNORA7A	0.0118341	0.0650976
MEF2A	0.0120419	0.066093
CDC40	0.0122341	0.0668435
ZSWIM6	0.0122596	0.0668435
EPS8L2	0.0122709	0.0668435
BRWD1	0.0123202	0.0668435
SMC5	0.0123304	0.0668435
ARPP19	0.0123417	0.0668435
ARHGAP5	0.0125032	0.0671705
COL4A2	0.0125163	0.0671705
WAPAL	0.0125314	0.0671705
ZRANB1	0.0125507	0.0671705
SEC23A	0.0125525	0.0671705
SNORA37	0.012566	0.0671705
ECHDC1	0.0127167	0.067799
GATS	0.0127387	0.067799
SUV420H1	0.0128043	0.0678545
TP53INP2	0.0128044	0.0678545
NOTCH2NL	0.0128356	0.0678737
TPT1	0.0128812	0.0679688
ELN	0.0129119	0.067985
SPIN3	0.0130122	0.0681438
PKN1	0.0130706	0.0681438
NKTR	0.0130847	0.0681438
HNRNPH1	0.013099	0.0681438
MGEA5	0.0131123	0.0681438
DSTN	0.0131276	0.0681438
PRKD3	0.0131497	0.0681438
FAM120B	0.013167	0.0681438
LOC100190986	0.0131915	0.0681438
HNRPDL	0.0132377	0.0682164
DYNC1LI2	0.013261	0.0682164
UBE2K	0.0133234	0.0683708
USP53	0.0133467	0.0683708
LEPROTL1	0.0133891	0.0684453
NCS1	0.0134227	0.0684578
RAB8B	0.0134472	0.0684578
CRISPLD2	0.0135269	0.0687214
NCOA6	0.0136137	0.0689749
PRPF39	0.0136329	0.0689749
DNM1L	0.0137838	0.0695124
GPATCH2	0.0138109	0.0695124
ATP8B2	0.013839	0.0695124
MTRNR2L3	0.0138522	0.0695124
CHD2	0.0139346	0.0697833
SLC38A10	0.0140247	0.0700918
SLC2A3	0.0141763	0.0705392
DYNLT3	0.0141775	0.0705392
ARID2	0.0142247	0.0705392
FMNL2	0.0142483	0.0705392
NPC2	0.0142576	0.0705392
HNRNPH3	0.0143295	0.0707524
SAMD8	0.0146267	0.0720223
ZNF192	0.0146453	0.0720223
PURB	0.0148095	0.0726843
CRY2	0.014895	0.0726949
OPHN1	0.0149591	0.0726949
IMPDH2	0.0149711	0.0726949
SNX14	0.0149924	0.0726949
SLC31A1	0.0149983	0.0726949
PKM2	0.0150072	0.0726949
HIST1H2AE	0.0150228	0.0726949
REEP6	0.0150481	0.0726949
ESCO1	0.0150973	0.0727895
SBNO1	0.0151888	0.0730161
GABARAPL1	0.0152037	0.0730161
GNE	0.0152344	0.0730208
STARD10	0.0153223	0.0731784
ARHGAP12	0.0153268	0.0731784
LOC729513	0.0154246	0.0735025
UBP1	0.0155149	0.0736563
NUMA1	0.0155167	0.0736563
DENND4C	0.0155607	0.0737226
SBDSP1	0.0155973	0.0737541
ZC3H13	0.0156683	0.0738449
NDEL1	0.015701	0.0738449
AGRN	0.0157066	0.0738449
HEATR7A	0.0158096	0.074187
SLC25A27	0.0158959	0.0744503
RHOC	0.0159492	0.0745576
MAP3K7	0.0160799	0.0747045
RNU11	0.0161188	0.0747045
BCL2L12	0.0162025	0.0747045
PHIP	0.0162117	0.0747045
ZNF33B	0.0162539	0.0747045
SNORD15B	0.0162678	0.0747045
ZNF780B	0.0163077	0.0747045
TRAPPC12	0.0163085	0.0747045
ZNF337	0.0163091	0.0747045
CALD1	0.0163178	0.0747045
SHOC2	0.0163843	0.0747045
RBFOX2	0.0163891	0.0747045
TMPRSS2	0.0164039	0.0747045
HELZ	0.0164573	0.0747045
SPDYE7P	0.0164583	0.0747045
CYP20A1	0.0164898	0.0747045
IGBP1	0.0164971	0.0747045
ANAPC11	0.0166831	0.0751799
CORO1B	0.0167286	0.0751799
NFKBIZ	0.0167415	0.0751799
FLJ10038	0.0168349	0.0751799
NR4A3	0.0168498	0.0751799
IDE	0.0168586	0.0751799
RHEB	0.0168647	0.0751799
RPE	0.0168769	0.0751799
BBIP1	0.0169003	0.0751799
STAM2	0.0169078	0.0751799
ATP2A2	0.0169736	0.075211
TAOK1	0.0169964	0.075211
ZBTB16	0.0170066	0.075211
ZNF507	0.0170732	0.07537
H3F3B	0.0171894	0.0754474
NCOA2	0.0172376	0.0754474
TNRC6A	0.0172481	0.0754474
SMAD4	0.0173418	0.0754474
AP3B1	0.0173694	0.0754474
FZD7	0.0173754	0.0754474
NCBP1	0.0174021	0.0754474
NHLRC2	0.0174546	0.0754474
ABHD12	0.0174668	0.0754474
TACC1	0.0174755	0.0754474
DEGS1	0.017511	0.0754474
NDUFB11	0.0175345	0.0754474
AHI1	0.0175664	0.0754474
KIAA1109	0.0175897	0.0754474
TACC2	0.0176252	0.0754474
RABGAP1	0.0176537	0.0754474
AFF4	0.0176545	0.0754474
SLC25A36	0.0176708	0.0754474
FGF13	0.0176737	0.0754474
FBXO11	0.0177051	0.0754503
MGP	0.0177918	0.075558
CFLAR	0.0177918	0.075558
CRAT	0.017836	0.0756153
LONRF1	0.0179254	0.0758266
NHLRC3	0.0179476	0.0758266
SDHA	0.0180002	0.0759186
NIPBL	0.0181569	0.0764483
TMED3	0.0182624	0.0766381
FBXL4	0.0182643	0.0766381
RGL2	0.0183578	0.0768991
KLHL23	0.0184371	0.0769894
CGNL1	0.018442	0.0769894
MYH9	0.0185298	0.0771511
FNBP1	0.0185435	0.0771511
GCFC1	0.0185924	0.0772239
RBM34	0.0187233	0.0776368
GNB2	0.0187777	0.0777312
MAST2	0.0189089	0.0781427
COL15A1	0.0190368	0.0785392
BBS2	0.0190888	0.0786217
CDC42SE2	0.0191903	0.0788626
ZNF761	0.0192114	0.0788626
PM20D2	0.019299	0.0789502
ATP8B1	0.0192991	0.0789502
IVNS1ABP	0.0193407	0.0789502
MYEF2	0.0193612	0.0789502
PTP4A1	0.0194156	0.0789969
C16orf58	0.0194369	0.0789969
ATP6AP1	0.0195781	0.0794396
PDE5A	0.0196664	0.0794432
EIF3G	0.0196844	0.0794432
USP8	0.0197199	0.0794432
MYSM1	0.01975	0.0794432
SMU1	0.0197552	0.0794432
MAP4K5	0.0197937	0.0794432
ENAH	0.0198052	0.0794432
C5orf43	0.0198444	0.0794551
SELENBP1	0.0198727	0.0794551
RPS10	0.0199552	0.0796349
RTN4	0.0199825	0.0796349
SEC61A1	0.0200689	0.0797259
XRN1	0.0200702	0.0797259
PHPT1	0.0201264	0.0798202
ZMIZ1	0.0203032	0.0802491
MAP3K2	0.020328	0.0802491
MAGED1	0.0203324	0.0802491
UFL1	0.020478	0.0802891
EGR2	0.0205093	0.0802891
RPS9	0.0205305	0.0802891
SLC35A1	0.020554	0.0802891
NET1	0.020573	0.0802891
TUBB	0.0205951	0.0802891
NAA25	0.0205985	0.0802891
HOOK2	0.0206038	0.0802891
API5	0.0207083	0.0804566
LOC646762	0.0207122	0.0804566
CTSF	0.0207684	0.0805478
ERAP1	0.0208379	0.0806901
PRNP	0.0209288	0.0809146
RBMS3	0.0210532	0.0812678
SLC39A7	0.0211842	0.0815889
AZGP1	0.0212028	0.0815889
MEIS2	0.0212783	0.0817515
FBXO22	0.0213127	0.0817559
NFE2L2	0.0213728	0.0817658
SCYL2	0.0213962	0.0817658
OGN	0.02142	0.0817658
ODC1	0.0214483	0.0817658
SESN3	0.0216512	0.0822066
PNRC2	0.021691	0.0822066
ARHGAP29	0.0217146	0.0822066
ITSN2	0.0217355	0.0822066
CLDND1	0.0217677	0.0822066
RAB1B	0.0217821	0.0822066
PRDM2	0.0217979	0.0822066
MCL1	0.0219233	0.082553
SPINT2	0.0219572	0.0825539
SH3GLB1	0.0219995	0.0825869
SETX	0.0220583	0.0826812
CHD9	0.0221881	0.0829828
ENG	0.0222121	0.0829828
PPP2R5E	0.0222627	0.0829828
FGFRL1	0.0222737	0.0829828
SAT2	0.0224201	0.0833504
ANKHD1	0.0224402	0.0833504
UBXN4	0.0224814	0.0833512
CUL3	0.0225459	0.0833512
SMAP2	0.0225863	0.0833512
MGC27345	0.0225863	0.0833512
FAM177A1	0.0226099	0.0833512
RNF11	0.0226579	0.0834031
TMC5	0.0227521	0.0835859
KLF3	0.0228152	0.0835859
RNPEPL1	0.0228879	0.0835859
CD302	0.0229385	0.0835859
RBMXL1	0.0229599	0.0835859
FAM89B	0.0229829	0.0835859
PTGS2	0.0230407	0.0835859
ZNF189	0.023081	0.0835859
PIEZO1	0.0230851	0.0835859
MSRB3	0.0231149	0.0835859
RORA	0.0231281	0.0835859
MRPL19	0.0231661	0.0835859
C12orf57	0.0231689	0.0835859
LOC100129361	0.0231874	0.0835859
C18orf1	0.0232175	0.0835859
ARL5B	0.023296	0.083746
UQCR11	0.0233375	0.0837726
APP	0.0234322	0.0839899
GATC	0.0235411	0.0842577
FAM178A	0.0236032	0.0843571
RNPC3	0.0238458	0.0848923
BHLHE40	0.0238616	0.0848923
COA5	0.0238643	0.0848923
ENOSF1	0.0238911	0.0848923
SMARCAD1	0.0239777	0.085013
USP33	0.0239942	0.085013
IL17RC	0.0241198	0.0853086
MAFF	0.024147	0.0853086
PDCD7	0.0241973	0.0853635
LOC158257	0.0242657	0.0854823
FHL1	0.0244635	0.0858609
HBS1L	0.0244703	0.0858609
EIF3H	0.0244992	0.0858609
CEBPZ	0.0245286	0.0858609
COTL1	0.0246266	0.0858609
GTF3C1	0.0246269	0.0858609
ZNF621	0.0246397	0.0858609
UBXN6	0.0246997	0.0858609
DCP1A	0.0247086	0.0858609
TOMM7	0.0247224	0.0858609
PRRC2A	0.024759	0.085867
AP2S1	0.0249208	0.0861322
TAS2R30	0.0249309	0.0861322
KIAA2018	0.0249406	0.0861322
PCF11	0.0250283	0.0863139
BTBD3	0.0250729	0.0863398
BAIAP2	0.025106	0.0863398
PPAP2B	0.0251761	0.08646
LIMS1	0.0252504	0.086594
PROSER1	0.0253188	0.0867078
SCAMP1	0.0253621	0.0867353
RPS16P5	0.0254174	0.0868034
NSRP1	0.0255048	0.0869342
ALG13	0.0255263	0.0869342
C7orf49	0.0255995	0.0870627
TBCD	0.0258857	0.0878747
FKBP8	0.0259097	0.0878747
SYNC	0.0259496	0.0878888
EPC2	0.0260922	0.0882502
ADAMTS1	0.0261622	0.0883654
PPIEL	0.0262967	0.0886978
ZNF280D	0.0264607	0.0891288
ABHD2	0.0266838	0.0896105
SLTM	0.0267068	0.0896105
IGF2	0.0267479	0.0896105
HAUS3	0.0267859	0.0896105
CLIC4	0.0268178	0.0896105
CBX6	0.0268359	0.0896105
CCNT1	0.0269059	0.0896105
TAF9	0.0269522	0.0896105
SKIV2L2	0.0269961	0.0896105
USP34	0.0270455	0.0896105
LAMTOR1	0.0270514	0.0896105
EEA1	0.0270659	0.0896105
DLG1	0.0270824	0.0896105
WAC	0.0271139	0.0896105
PPIP5K2	0.0272421	0.0898357
PIKFYVE	0.027274	0.0898357
IGFBP7	0.0272917	0.0898357
DNPEP	0.027398	0.090065
SPDEF	0.0275474	0.0902714
TMEM214	0.0275549	0.0902714
EFR3A	0.0275856	0.0902714
YES1	0.0276076	0.0902714
PPP1R12B	0.0276843	0.090376
PRKAA1	0.0277595	0.090376
CHURC1	0.0277856	0.090376
PER2	0.0277866	0.090376
TMEM50B	0.0279774	0.0907055
STX5	0.0280006	0.0907055
KLHL5	0.0280266	0.0907055
LMAN2	0.0280355	0.0907055
MARK2	0.0280807	0.0907324
PLOD1	0.0281992	0.0908785
LOC100129387	0.0282267	0.0908785
PAIP1	0.028305	0.0908785
PREPL	0.0283208	0.0908785
GAPDH	0.0283661	0.0908785
CD2AP	0.0284178	0.0908785
LIN7C	0.028465	0.0908785
JAM3	0.0285047	0.0908785
STK38L	0.0285376	0.0908785
ARAP1	0.0285425	0.0908785
USP24	0.0285633	0.0908785
CPEB2	0.0285861	0.0908785
PALLD	0.0286064	0.0908785
BCL2L1	0.02868	0.0909205
NAA15	0.0286936	0.0909205
ZAK	0.0287317	0.0909243
ADAMTSL4	0.0288268	0.0910357
MEMO1	0.028841	0.0910357
RDH10	0.028905	0.0911209
ARHGEF1	0.0289989	0.0912999
DCAF5	0.0290591	0.0913722
SCARNA2	0.0291369	0.0914999
AP1G1	0.0292045	0.0915951
IGFBP2	0.0293663	0.0918876
HDHD2	0.0294101	0.0918876
SRSF7	0.0294346	0.0918876
LIFR	0.0295127	0.0918876
RRAS2	0.0295223	0.0918876
ADAM15	0.0295564	0.0918876
SMAD5	0.0295628	0.0918876
ZC3HAV1	0.0296005	0.0918876
PYGO2	0.029634	0.0918876
CRLF3	0.0297539	0.0921429
LOC100506990	0.0298657	0.0921914
BTRC	0.0298808	0.0921914
SKA2	0.029882	0.0921914
LZTR1	0.0300397	0.0925619
IRAK1	0.0301606	0.0928181
KIF5B	0.0302673	0.0929592
SLC39A14	0.0302834	0.0929592
MYO9A	0.0303199	0.0929592
MAGOH	0.0304103	0.0929618
MAP3K4	0.030427	0.0929618
SETD2	0.0304342	0.0929618
KIDINS220	0.030473	0.0929649
SLC12A2	0.0305641	0.0930036
MYO1C	0.0305753	0.0930036
PPP2R1A	0.0305991	0.0930036
RPL36A.HNRNPH2	0.0307657	0.0932878
CTDSP1	0.0307685	0.0932878
ZBTB7B	0.0308101	0.0932988
C22orf28	0.0309701	0.0936679
FOXJ3	0.0310477	0.0937021
PSMD2	0.0310638	0.0937021
ID2	0.0310957	0.0937021
GNB2L1	0.0312877	0.0941653
AGFG1	0.0313654	0.0942837
USP15	0.0314283	0.0943573
HTATSF1	0.0316235	0.0948276
SAE1	0.0317088	0.0949567
RNF181	0.0317558	0.0949567
C1R	0.0317824	0.0949567
DCAF16	0.0318863	0.0951516
SOS2	0.0319783	0.0953053
SPOPL	0.0320421	0.0953053
RNF141	0.0321096	0.0953053
VMP1	0.0321152	0.0953053
SP3	0.0321316	0.0953053
RPLP1	0.032281	0.0956071
SCD5	0.0323465	0.0956071
LPP	0.03235	0.0956071
LAPTM5	0.0324784	0.095674
HNRNPU	0.0324845	0.095674
ECHS1	0.0324894	0.095674
TRIM13	0.032534	0.0956908
EHBP1L1	0.0325792	0.0957093
DDX17	0.032663	0.0958409
WBSCR22	0.0327567	0.0960015
SH3D19	0.0331295	0.0969538
CASC4	0.0331606	0.0969538
TRAPPC6B	0.0333098	0.0972744
HSP90AB1	0.0333943	0.0974057
TOM1L2	0.0334407	0.0974253
F3	0.0335108	0.0974955
LUC7L	0.0335441	0.0974955
SUGP2	0.0336187	0.0975553
POMGNT1	0.033644	0.0975553
ZNF586	0.0337293	0.097577
ATP6V0D1	0.0337673	0.097577
ATPIF1	0.0337757	0.097577
IDH3A	0.0338384	0.097577
FASN	0.0339227	0.097577
VOPP1	0.0339286	0.097577
MCM7	0.0339293	0.097577
NECAP1	0.0340105	0.0976349
UBR3	0.0340288	0.0976349
DPY19L3	0.0340837	0.0976784
CTDSPL2	0.0343569	0.098189
FAM135A	0.034394	0.098189
RTF1	0.0344897	0.098189
EHBP1	0.034507	0.098189
YIPF3	0.0345212	0.098189
TPCN1	0.0345788	0.098189
MCFD2	0.0345905	0.098189
PTAR1	0.0346549	0.098189
WTAP	0.0346841	0.098189
COX5A	0.0346939	0.098189
SMPD4	0.0347011	0.098189
RNF187	0.0347468	0.0982052
NBEA	0.0349226	0.0985889
EVI5	0.035039	0.098804
NAA50	0.0351385	0.0989711
POLDIP3	0.0351986	0.099027
PPP2R4	0.0353055	0.0991181
BOD1L	0.0353117	0.0991181
NOLC1	0.0354125	0.0991642
QARS	0.0354574	0.0991642
ARHGAP21	0.0354707	0.0991642
CD164	0.0354894	0.0991642
NEDD9	0.0356727	0.0994806
SS18	0.0356888	0.0994806
SENP6	0.035724	0.0994806
PLBD2	0.0357925	0.0995586
C19orf63	0.0358579	0.0995589
ZCCHC11	0.0358904	0.0995589
PIH1D1	0.0359141	0.0995589
TMSB10	0.0359883	0.0995696
PTPRF	0.0359989	0.0995696
FAAH	0.0360631	0.0996351
TKT	0.0361586	0.0997869
MCTP2	0.0362691	0.0998894
DDX42	0.036277	0.0998894
MPP5	0.0363226	0.0999031
