# Supplementary material for: Global Transcriptome Analysis of Formalin-Fixed Prostate Cancer Specimens Identifies Biomarkers of Disease Recurrence
Source: Oxford University Press journal article supplement (doi:10.1158/0008-5472.can-13-2699), 2014-04-09
Supplement: 00085472can132699-sup-tab6.xlsx [file 00085472can132699-sup-tab6.xlsx]

## Sheet: Supplementary Table 6
Supplementary Table 6: Set of most significantly enriched biological functions as deterermined by IPA analysis based on the gene list in Supplementary Table 5.
Category	Functions Annotation	p-Value	Molecules	# Molecules
RNA Post-Transcriptional Modification	processing of RNA	5.1e-13	APP,CDC40,CLK4,CPSF6,DDX17,DIS3,HNRNPH1,HNRNPH3,HNRNPU,HNRPDL,INTS6,IVNS1ABP,LUC7L3,MBNL2,NCBP1,NOLC1,NUDT21,PABPC1,PNN,PPIG,PRPF19,PRPF3,PRPF4B,RBFOX2,RBMXL1,RPS19,SBDS,SCAF1,SETX,SFPQ,SPOP,SREK1,SRSF1,SRSF10,SRSF11,SRSF3,SRSF6,SRSF7,SYNCRIP,TARDBP,TRA2A,TRA2B,XRN1,YTHDC1	44
Gene Expression	expression of RNA	9.35e-13	AEBP1,AFF4,AGRN,APP,ARID2,ATF3,ATF4,ATF6B,ATP8B1,ATXN7,BCLAF1,BHLHE40,BIRC2,BRWD1,BTAF1,BTG2,BTRC,CCNT1,CCNT2,CEBPZ,CFLAR,CHD1,CHD2,CHURC1,CLOCK,COL1A1,COL4A2,CRLF3,CRY2,CTDSP1,DCP1A,DDX17,DDX3X,DMTF1,EGR1,EGR2,EIF3G,EIF3H,EIF5,ENG,ERBB2,FOXF1,FOXO1,FZD7,GAPDH,GNB2L1,GPBP1,GPX1,GTF3C1,HBS1L,HIPK3,HIST1H1C,HTATSF1,ID2,IGBP1,IGF1,IGF2,IGFBP3,IL6ST,IRAK1,IVNS1ABP,JAG1,JAZF1,KLF10,KLF9,KRAS,LBH,LIMD1…	179
Cell Death and Survival	apoptosis	1.26e-08	ADAM15,ADAMTS1,ADAMTSL4,AGRN,AHI1,ALCAM,APH1A,API5,APP,ATF3,ATF4,ATG5,ATMIN,ATPIF1,BAZ1A,BBS2,BCL2L1,BCL2L12,BCLAF1,BGN,BHLHE40,BIRC2,BNIP2,BNIP3L,BTG2,BTRC,CCNT1,CD2AP,CDC42EP3,CFLAR,CLIC4,COL1A1,COL4A2,COX5A,CSK,CTSD,CUL3,CYCS,CYLD,DAP3,DDX17,DDX3X,DHCR24,DNM1L,DPP4,EGR1,EGR2,EGR3,EIF3H,ERBB2,F3,FASN,FBLIM1,FGFRL1,FIS1,FKBP8,FOXO1,GAPDH,GNB2,GNB2L1,GNE,GNPTG,GPX1,HIPK3,HIST1H1C,HSP90AB1,HSPB8,I…	198
Cellular Growth and Proliferation	proliferation of cells	4.98e-08	ABCC5,ADAM15,ADAMTS1,AEBP1,AGRN,ALCAM,AMD1,APP,ARHGAP5,ARHGEF1,ARRDC3,ASCC3,ATF3,ATF4,ATG5,ATMIN,ATP2A2,ATP6V0D1,ATP6V0E2,ATPIF1,BCL2L1,BCLAF1,BGN,BHLHE40,BIRC2,BTG2,BTRC,CD164,CD2AP,CFLAR,CKS1B,CLOCK,COL1A1,COL1A2,COL4A2,COQ7,CRLF3,CSK,CTSD,CTSF,CUL3,CYLD,CYP20A1,DAP3,DDX17,DDX3X,DEGS1,DHCR24,DLG1,DMTF1,DNM1L,DPP4,EGR1,EGR2,EGR3,EIF3H,ELN,ENG,ERAP1,ERBB2,ERBB2IP,EVI5,F3,FASN,FBLIM1,FBXO11,FGF13,…	243
Organismal Survival	organismal death	5.88e-08	ABCA5,ADAM15,ADAMTS1,AEBP1,AFF4,AGRN,AHI1,AP1G1,AP2M1,APH1A,APP,ARHGAP5,ATF4,ATG5,ATMIN,ATP2A2,ATP6AP1,BCL2L1,BCLAF1,BGN,BIRC2,BNIP3L,CACNB2,CD2AP,CFLAR,CKS1B,CLIC4,CNPY3,COL1A1,COL3A1,COL4A2,COQ7,CRLF3,CSK,CTSD,CTSF,CYLD,DDX17,DLG1,DMTF1,DNM1L,EGR2,EGR3,ELN,ENG,ERBB2,F3,FASN,FBLIM1,FGFRL1,FKBP8,FOXF1,FOXO1,GGCX,GNE,GPX1,HIST1H1C,HSP90AB1,HSPB8,ID2,IDE,IFT57,IGF1,IGF2,IGFBP3,IL6ST,IMPDH2,IRAK1,IT…	181
Cell Morphology	autophagy of cells	1.38e-06	APP,ATF4,ATG14,ATG5,BAIAP2,BCL2L1,BIRC2,BNIP3L,CFLAR,COX5A,DNM1L,FOXO1,GABARAPL1,GOPC,HSPB8,KRAS,MAP1LC3B,MAP3K7,MTOR,NFE2L2,PIK3R1,PRKAA1,PRNP,SH3GLB1,SIRT1,TUFM	26
Cell Cycle	cell cycle progression	1.57e-06	ANAPC11,APP,ATF3,ATG5,ATMIN,BCL2L1,BCL2L12,BHLHE40,BIRC2,BTG2,BTRC,CALD1,CHRDL1,CKS1B,COL1A1,COL4A2,CUL3,CYLD,DDX17,DLG1,DMTF1,DPP4,DYNLT3,EGR1,ERBB2,FASN,FGFRL1,FOXO1,GNB2L1,GPX1,HAUS3,HMG20B,ID2,IGF1,IGF2,IGFBP2,IGFBP3,IGFBP7,KIF2A,KRAS,LATS1,LRP6,MAGED1,MAP3K7,MDM4,MTOR,MXI1,NAE1,NDE1,NEDD9,NOLC1,NR3C1,NR4A3,NUMA1,ORC2,PCM1,PHIP,PIAS2,PIK3R1,PIKFYVE,PKN2,PNN,PPP1R12A,PTGS2,PTN,PTP4A1,PTPRF,RHE…	89
Embryonic Development	death of embryo	1.7e-06	AP1G1,AP2M1,FASN,IMPDH2,KIF5B,LIMS1,LRP6,MDM4,PIKFYVE,PNN,PRPF19,REV3L,RPS19,SLC31A1,SRSF3,TKT,TPM3,UBR3	18
Developmental Disorder	Growth Failure	2.23e-06	AEBP1,AFF4,AP1G1,ATF4,ATMIN,BNIP3L,CD2AP,CFLAR,CNPY3,COQ7,DMTF1,EGR1,F3,FGFRL1,FOXO1,GPX1,ID2,IFT57,IGF1,IGF2,JAG1,KRAS,MARK2,MGP,MLL5,MTOR,NCOA6,NFAT5,NFE2L2,NR4A3,PDE4D,PPAP2B,PYGO2,RC3H1,RDH10,RHEB,SATB1,SETD2,SFRP2,SIRT1,SLC12A2,SLC39A14,SMAD3,SMAD5,SRSF10,SS18,TEAD1,TIA1,TIAL1,TKT,TPT1,TRIM33,UBE3A,UBP1,USP8,VCL,XPA,ZFP36	58
Cellular Assembly and Organization	organization of organelle	3.15e-06	AGFG1,AGRN,ARAP1,ATXN7,BGN,BNIP2,CD2AP,COL1A1,COL1A2,COL3A1,CSK,DLG1,DNM1L,FBLIM1,FIS1,FNBP1,GAPDH,HAUS3,HOOK2,HOOK3,KRAS,LAMTOR1,MTOR,MYH9,NDE1,NDEL1,NOLC1,NUMA1,PALLD,PCM1,PPP1R12A,PRNP,RAB8B,RDX,RHOB,RHOC,RLF,SATB1,SFRP2,TPM1,TUBB,USP8,VCL	43
Infectious Disease	Viral Infection	4.14e-06	AASS,AGFG1,AP2A1,AP2M1,AP3M1,APP,ARHGAP21,ARRDC3,ATF4,ATG5,ATMIN,ATP6AP1,ATP6V0D1,ATPIF1,BCL2L1,BCLAF1,BGN,BNIP2,BTG2,BTRC,C1R,CALD1,CCNT1,CD164,CDC40,CDC42EP3,CHD1,CHMP1B,CLDND1,CLIC4,CLOCK,CLUH,COL3A1,CYCS,DDX3X,DLG1,DPP4,EEA1,EGR1,EIF3G,EIF3H,F3,FAM135A,FBLIM1,FDPS,FTL,GABARAPL1,GAPDH,GOPC,H3F3A/H3F3B,HIPK3,HIST1H1C,HIST1H2AC,HIST1H2BJ/HIST1H2BK,HIST2H2BE (includes others),HNRNPH1,HNRNPU,HNRPD…	128
Cancer	breast cancer	8.94e-06	ABCC5,ADAM15,ADAMTS1,ARHGEF1,ATF3,BHLHE40,BTG2,BTRC,CALD1,COL1A1,COL1A2,CPEB2,CTSD,CYCS,CYLD,DDX17,EGR1,EIF3H,EIF5,ENAH,ENG,EPM2AIP1,ERBB2,ESCO1,FAM174B,FASN,FDPS,FIS1,FOXO1,GAPDH,GPRASP1,H3F3A/H3F3B,HEATR7B2,HIST2H2BE (includes others),HOOK3,HSPB8,IDH3A,IGF1,IGFBP3,IL6ST,ITPR1,KLF10,KRAS,MAGED2,MAP1LC3B,MAP3K4,MCL1,MDM4,MINK1,MTOR,MYH9,MYLK,NFE2L2,NR3C1,NR4A3,ODC1,PALLD,PNRC1,PPP1R12B,PSIP1,PTGS…	85
Tissue Development	formation of filaments	2.9e-05	ADAMTSL4,AKAP11,APP,ARAP1,ARHGEF1,CALD1,CUL3,DLG1,DSTN,ELN,FBLIM1,FHL1,IDE,IGF1,JAG1,KRAS,LATS1,MINK1,MTOR,MYH11,MYLK,NET1,PALLD,PKN2,RASA1,RHOB,RHOC,RHOQ,RICTOR,SMAD3,SORBS1,TBCD,TMSB10/TMSB4X,TNS3,TPM1,TUB,TUBB	37
Amino Acid Metabolism	incorporation of L-amino acid	4.94e-05	IGF1,IGFBP2,IGFBP3,RASA1,SERINC1	5
Cellular Development	differentiation of tumor cell lines	5.39e-05	AMD1,APP,ATF4,AZGP1,BCL2L1,BHLHE40,BTG2,CHD1,DMTF1,DPP4,EGR1,ERBB2,ERBB2IP,HIST1H4A (includes others),HMG20B,IGF1,IGF2,IL6ST,JAG1,KRAS,LIFR,MAP3K7,MCL1,MTOR,ODC1,PDE4D,PIK3R1,PRKD3,PRPF19,PTGS2,RHOQ,RIT1,RRAS2,SFPQ,SMAD4,ZBTB16	36
Renal and Urological Disease	hydronephrosis	8.82e-05	ADAMTS1,ALCAM,DLG1,FGF13,ID2,IGF1,MYH11,NFAT5,NFIA,PSAP,PTN,SFRP2,VAMP8	13
Dermatological Diseases and Conditions	tumorigenesis of papilloma	9.15e-05	ATP2A2,EGR1,ENG,ERBB2,KRAS,NFE2L2,ODC1,SMAD3,XPA	9
Renal and Urological System Development and Function	cell cycle progression of kidney cell lines	9.38e-05	DDX17,KRAS,MTOR,PNN,SMAD3,ZBTB5	6
Cellular Movement	invasion of colon cancer cell lines	0.000104	ATF3,CSK,ERBB2,GNB2L1,IGF2,KRAS,NFAT5,PTGS2,RASA1,STK38L,TMSB10/TMSB4X	11
Connective Tissue Development and Function	binding of osteoblasts	0.000192	IGF1,IGF2,IGFBP2,IGFBP3	4
Tissue Morphology	morphology of embryonic tissue	0.000233	APH1A,BCLAF1,CSK,CUL3,CYLD,DLG1,DNM1L,EGR2,ENG,ERBB2,F3,FGFRL1,FKBP8,FOXF1,FOXO1,HIST1H1C,ID2,IFT57,IL6ST,JAG1,KRAS,LAMTOR1,LIMS1,LRP6,MAP3K7,MTOR,MYH9,NCOA6,NFIA,NR4A3,PIKFYVE,PPAP2B,PTGS2,RASA1,RDH10,REV3L,SETD2,SIRT1,SLC31A1,SMAD3,SMAD4,SMAD5,SMARCA5,SS18,TEAD1,TPT1,TRIM33,UBP1,VCL,ZMIZ1	50
Protein Degradation	catabolism of protein	0.00029	ARIH1,BTRC,FBXL4,FBXO22,IGF1,MDM4,MGEA5,MTOR,RHBDD1,RLIM,RNF11,RNF6,SGSM3,SIAH1,UBE2K,UBE3A,UBR3,USP33	18
Cell Signaling	small GTPase mediated signal transduction	0.000509	ARHGAP29,ARHGAP5,ARHGEF1,BAIAP2,BNIP2,COL1A2,CUL3,DHCR24,EPS8L2,IGF1,KRAS,RAP1A,RAP1B,RHOB,RRAS2,SOS2,SYNJ2BP,USP8	18
Post-Translational Modification	ubiquitination of protein	0.000522	ANAPC11,ARIH1,ATG5,BIRC2,BTRC,CUL3,FBXO22,FBXW2,MARCH5,PRPF19,RC3H1,RLIM,RNF11,RNF6,SAE1,SIAH1,TRIM13,TRIM33,UBE2J1,UBE2K,UBE3A,UBR3,USP8	23
Reproductive System Disease	uterine cancer	0.000527	ABI2,AP2S1,BTRC,CACNB2,CHRDL1,CKS1B,CLUH,COL15A1,COL3A1,CRY2,CTSF,ERBB2,FHL1,GPRASP1,HAUS3,HIST1H1C,HOOK3,HSP90AB1,IFITM3,IGF1,IGF2,IGFBP2,IGFBP3,IGFBP7,IRAK1,ITPR1,JAM3,KLF9,KRAS,LIFR,LPP,MALAT1,MAOA,MCM7,MGP,MLH3,MTOR,MYH11,MYLK,NCOA6,NFE2L2,NR3C1,PDE5A,PGM5,PIK3R1,PPIG,PPP1R12B,PPP2R1A,PTGS2,PTN,PTPRF,RPE,RPS19,SFRP4,SLC7A6,SMAD5,SPINT2,SPOP,SYNM,SYNPO2,TMSB10/TMSB4X,TPM1,TPM3,UBE3A,VAMP8,ZAK,…	69
Reproductive System Development and Function	proliferation of mammary epithelial cells	0.000555	BIRC2,BTRC,ERBB2,ID2,IGF1,IGF2,SMAD4	7
Nervous System Development and Function	formation of neural tube	0.000567	APH1A,COQ7,CSK,IFT57,MAP3K7,PALLD,PLXNB2,SETD2,SFRP2,SMAD5,SS18,TEAD1,TERC	13
Cancer	prostatic tumor	0.00938	ABCA5,ADAM15,AMD1,BCL2L1,BHLHE40,BTRC,C1R,CHD1,EHBP1,EIF3H,ENG,ERBB2,FASN,FDPS,HNRNPH1,HOOK2,IFT57,IGF1,IGFBP3,KIAA0947,KRAS,LYZ,MCL1,MCM7,MTOR,MXI1,NCOA6,ODC1,PDE5A,PIK3C2A,PRKD3,PSIP1,PSMD4,PTGS2,RHOC,RLIM,SLC7A6,SND1,SPDEF,SPOP,SYNPO2,TMPRSS2,TNRC6A,TNS3,TUBB,UBE3A,ZFP36	47
