# Supplementary material for: Global Transcriptome Analysis of Formalin-Fixed Prostate Cancer Specimens Identifies Biomarkers of Disease Recurrence
Source: Oxford University Press journal article supplement (doi:10.1158/0008-5472.can-13-2699), 2014-04-09
Supplement: 00085472can132699-sup-tab7.xlsx [file 00085472can132699-sup-tab7.xlsx]

## Sheet: Supplementary Table 7
Supplementary Table 7: Set of most significantly enriched canonical pathways as deterermined by IPA analysis based on the gene list in Supplementary Table 5.
Ingenuity Canonical Pathways	p-value	Ratio	Molecules
mTOR Signaling	6.0256e-06	0.109	RHEB,PIK3C2A,EIF3H,RHOC,PIK3R1,RPS19,EIF3J,KRAS,RICTOR,EIF3G,PPP2R1A,MTOR,RRAS2,RHOQ,RHOB,PPP2R4,RPS9,PRKAA1,RPS20,PPP2R5E,RPS10,PRKD3,FNBP1
Regulation of eIF4 and p70S6K Signaling	5.24807e-05	0.103	PABPC1,PIK3C2A,EIF3H,PIK3R1,SOS2,RPS19,EIF3J,KRAS,EIF3G,PPP2R1A,MTOR,RRAS2,PPP2R4,PAIP1,RPS9,RPS20,PPP2R5E,RPS10
PI3K/AKT Signaling	6.0256e-05	0.111	RHEB,PIK3R1,SOS2,KRAS,BCL2L1,MTOR,PPP2R1A,RRAS2,HSP90AB1,INPP5F,FOXO1,LIMS1,PPP2R4,PTGS2,PPP2R5E,MCL1
Actin Nucleation by ARP-WASP Complex	0.000102329	0.152	RRAS2,RHOQ,RHOB,RHOC,SOS2,BAIAP2,PPP1R12B,PPP1R12A,KRAS,FNBP1
ILK Signaling	0.000112202	0.104	FBLIM1,PIK3C2A,TMSB10/TMSB4X,RHOC,PIK3R1,MYH11,RICTOR,PPP2R1A,MTOR,RHOQ,RHOB,LIMS1,PPP2R4,PPAP2B,ATF4,PPP1R12A,MYH9,PTGS2,PPP2R5E,FNBP1
Huntington's Disease Signaling	0.00042658	0.0875	SDHA,PIK3C2A,PIK3R1,IFT57,SOS2,GNB2L1,ITPR1,ZDHHC17,TAF9B,CTSD,BCL2L1,MTOR,IGF1,GNB2,ATF4,GOSR1,CAPN7,DNM1L,CYCS,PRKD3,RASA1
Mouse Embryonic Stem Cell Pluripotency	0.000645654	0.121	IL6ST,LIFR,ID2,RRAS2,PIK3C2A,MAP3K7,PIK3R1,SOS2,SMAD4,KRAS,SMAD5,FZD7
Integrin Signaling	0.000660693	0.0918	RAP1B,PIK3C2A,RHOC,PIK3R1,SOS2,KRAS,RAP1A,ARHGAP5,MYLK,RRAS2,RHOQ,RHOB,LIMS1,PPP1R12B,PPP1R12A,VCL,CAPN7,NEDD9,FNBP1
EIF2 Signaling	0.000812831	0.09	PABPC1,RPL36A/RPL36A-HNRNPH2,PIK3C2A,EIF3H,PIK3R1,SOS2,RPS19,EIF3J,KRAS,EIF3G,RRAS2,PAIP1,EIF5,RPS9,RPS20,RPS10,RPLP1,RPL13
HGF Signaling	0.000933254	0.114	RAP1B,RRAS2,PIK3C2A,MAP3K7,PIK3R1,SOS2,KRAS,PTGS2,MAP3K4,PRKD3,RAP1A,MAP3K2
B Cell Receptor Signaling	0.00107152	0.0941	PIK3C2A,CSK,PIK3R1,EGR1,SOS2,KRAS,MAP3K4,BCL2L1,MTOR,NFAT5,RRAS2,FOXO1,INPP5F,MAP3K7,ATF4,MAP3K2
Glioblastoma Multiforme Signaling	0.00131826	0.0915	PIK3C2A,RHOC,PIK3R1,SOS2,KRAS,ITPR1,IGF2,MTOR,RRAS2,RHOQ,FOXO1,RHOB,IGF1,FNBP1,FZD7
RhoA Signaling	0.00131826	0.108	PIKFYVE,RDX,CDC42EP3,ARHGEF1,PKN1,ARHGAP5,MYLK,LPAR6,IGF1,BAIAP2,PPP1R12B,PPP1R12A,ARHGAP12
Production of Nitric Oxide and Reactive Oxygen Species in Macrophages	0.00154882	0.0806	RAP1B,PIK3C2A,RHOC,PIK3R1,MAP3K4,RAP1A,LYZ,PPP2R1A,RHOQ,RHOB,PPP2R4,MAP3K7,PPP1R12A,PPP2R5E,PRKD3,FNBP1,MAP3K2
NGF Signaling	0.00169824	0.102	RAP1B,RRAS2,SMPD4,PIK3C2A,MAP3K7,PIK3R1,SOS2,ATF4,KRAS,MAP3K4,RAP1A,MAP3K2
Actin Cytoskeleton Signaling	0.0017378	0.0798	ABI2,PIK3C2A,TMSB10/TMSB4X,PIK3R1,CSK,SOS2,RDX,PIKFYVE,ARHGEF1,KRAS,MYH11,FGF13,MYLK,RRAS2,BAIAP2,PPP1R12B,PPP1R12A,MYH9,VCL
Ceramide Signaling	0.00190546	0.112	CTSD,PPP2R1A,RRAS2,SMPD4,PIK3C2A,PPP2R4,PIK3R1,KRAS,PPP2R5E,CYCS
SAPK/JNK Signaling	0.00199526	0.108	MINK1,RRAS2,PIK3C2A,MAP3K7,PIK3R1,SOS2,ZAK,KRAS,MAP4K5,MAP3K4,MAP3K2
Germ Cell-Sertoli Cell Junction Signaling	0.00234423	0.0915	PIK3C2A,RHOC,PIK3R1,KRAS,MAP3K4,TUBB,RRAS2,RHOQ,RHOB,MAP3K7,SORBS1,PPAP2B,FNBP1,RAB8B,MAP3K2
Molecular Mechanisms of Cancer	0.00239883	0.0688	RAP1B,SMAD3,PIK3R1,LRP6,SOS2,ARHGEF1,KRAS,SMAD5,RHOB,MAP3K7,SMAD4,PRKD3,RASA1,PIK3C2A,RHOC,RAP1A,BCL2L1,RRAS2,RHOQ,FOXO1,APH1A,CFLAR,CYCS,FNBP1,BIRC2,FZD7
Glioma Invasiveness Signaling	0.0025704	0.133	RRAS2,RHOQ,PIK3C2A,RHOB,RHOC,PIK3R1,KRAS,FNBP1
IGF-1 Signaling	0.0025704	0.105	RRAS2,IGF1,FOXO1,PIK3C2A,PIK3R1,SOS2,IGFBP3,KRAS,IGFBP7,RASA1,IGFBP2
Cholecystokinin/Gastrin-mediated Signaling	0.00354813	0.104	RRAS2,RHOQ,RHOB,RHOC,SOS2,MEF2A,KRAS,PTGS2,ITPR1,PRKD3,FNBP1
IL-4 Signaling	0.00389045	0.114	MTOR,NFAT5,RRAS2,INPP5F,PIK3C2A,PIK3R1,SOS2,KRAS,NR3C1
UVA-Induced MAPK Signaling	0.00389045	0.109	BCL2L1,MTOR,RRAS2,SMPD4,PIK3C2A,PIK3R1,ZC3HAV1,PARP11,KRAS,CYCS
NRF2-mediated Oxidative Stress Response	0.0040738	0.0833	FTL,PIK3C2A,PIK3R1,HSPB8,KRAS,DNAJB14,MAFF,CUL3,DNAJC21,AKR1A1,RRAS2,MAP3K7,UBE2K,ATF4,NFE2L2,PRKD3
Phospholipase C Signaling	0.00436516	0.0731	RAP1B,RHOC,SOS2,GNB2L1,MEF2A,ARHGEF1,KRAS,ITPR1,RAP1A,RHOQ,NFAT5,RRAS2,RHOB,PPP1R12B,GNB2,ATF4,PPP1R12A,PRKD3,FNBP1
Tight Junction Signaling	0.00537032	0.087	MARK2,SYMPK,MYH11,MYLK,MPDZ,CPSF6,PPP2R1A,JAM3,MPP5,PPP2R4,NUDT21,MYH9,VCL,PPP2R5E
Docosahexaenoic Acid (DHA) Signaling	0.00549541	0.122	BCL2L1,FOXO1,PIK3C2A,PIK3R1,CYCS,APP
CNTF Signaling	0.00588844	0.127	IL6ST,LIFR,MTOR,RRAS2,PIK3C2A,PIK3R1,KRAS
Colorectal Cancer Metastasis Signaling	0.0060256	0.0736	SIAH1,IL6ST,PIK3C2A,RHOC,PIK3R1,SMAD3,LRP6,SOS2,GNB2L1,KRAS,BCL2L1,RRAS2,RHOQ,RHOB,GNB2,SMAD4,PTGS2,FNBP1,FZD7
Thrombin Signaling	0.00645654	0.0777	PIK3C2A,RHOC,PIK3R1,GNB2L1,ARHGEF1,KRAS,ITPR1,MYLK,RRAS2,RHOQ,RHOB,PPP1R12B,GNB2,PPP1R12A,PRKD3,FNBP1
JAK/Stat Signaling	0.00707946	0.114	BCL2L1,MTOR,PIAS2,RRAS2,PIK3C2A,PIK3R1,SOS2,KRAS
Regulation of Actin-based Motility by Rho	0.00758578	0.101	MYLK,RHOQ,RHOB,RHOC,BAIAP2,PIKFYVE,PPP1R12B,PPP1R12A,FNBP1
Prostate Cancer Signaling	0.00758578	0.0918	MTOR,RRAS2,FOXO1,PIK3C2A,HSP90AB1,PIK3R1,SOS2,ATF4,KRAS
CCR3 Signaling in Eosinophils	0.00870964	0.0866	MYLK,RRAS2,PIK3C2A,PIK3R1,GNB2L1,GNB2,PPP1R12B,PPP1R12A,KRAS,ITPR1,PRKD3
Regulation of the Epithelial-Mesenchymal Transition Pathway	0.00933254	0.0785	ID2,PIK3C2A,PIK3R1,EGR1,SMAD3,SOS2,KRAS,FGF13,PYGO2,RRAS2,APH1A,SMAD4,FGFRL1,JAG1,FZD7
ErbB Signaling	0.00954993	0.103	MTOR,RRAS2,FOXO1,PIK3C2A,PIK3R1,SOS2,KRAS,ERBB2,PRKD3
Pentose Phosphate Pathway	0.00954993	0.13	PGD,RPE,TKT
ErbB2-ErbB3 Signaling	0.00977237	0.117	RRAS2,FOXO1,PIK3C2A,PIK3R1,SOS2,KRAS,ERBB2
Myc Mediated Apoptosis Signaling	0.0107152	0.117	RRAS2,IGF1,PIK3C2A,PIK3R1,SOS2,KRAS,CYCS
IL-8 Signaling	0.0114815	0.0732	BCL2L1,MTOR,RHOQ,RRAS2,RHOB,PIK3C2A,RHOC,PIK3R1,GNB2L1,GNB2,KRAS,PTGS2,PRKD3,FNBP1,IRAK1
CXCR4 Signaling	0.011749	0.0774	RHOQ,RRAS2,RHOB,PIK3C2A,RHOC,EGR1,PIK3R1,GNB2L1,GNB2,KRAS,ITPR1,PRKD3,FNBP1
Circadian Rhythm Signaling	0.011749	0.135	BHLHE40,CRY2,CLOCK,ATF4,PER2
Neuregulin Signaling	0.011749	0.0882	ERBB2IP,MTOR,RRAS2,HSP90AB1,PIK3R1,SOS2,KRAS,ERBB2,PRKD3
Protein Ubiquitination Pathway	0.0120226	0.0709	USP24,USP12,USP15,HSPB8,DNAJB14,USP33,UBE3A,USP8,DNAJC21,USP53,HSP90AB1,PSMD2,USP47,BTRC,PSMD4,ANAPC11,USP34,UBE2J1,BIRC2
ErbB4 Signaling	0.0128825	0.104	RRAS2,PIK3C2A,APH1A,PIK3R1,SOS2,KRAS,PRKD3
HER-2 Signaling in Breast Cancer	0.0144544	0.1	RRAS2,FOXO1,PIK3C2A,PIK3R1,SOS2,KRAS,ERBB2,PRKD3
CTLA4 Signaling in Cytotoxic T Lymphocytes	0.0154882	0.0918	AP2M1,AP2A1,PPP2R1A,PIK3C2A,PPP2R4,PIK3R1,PPP2R5E,AP2S1,AP1G1
Breast Cancer Regulation by Stathmin1	0.0154882	0.0725	PIK3C2A,PIK3R1,SOS2,GNB2L1,ARHGEF1,KRAS,ITPR1,TUBB,PPP2R1A,RRAS2,PPP2R4,GNB2,PPP1R12A,PPP2R5E,PRKD3
Antiproliferative Role of Somatostatin Receptor 2	0.0165959	0.0986	RAP1B,RRAS2,PIK3C2A,PIK3R1,GNB2L1,GNB2,KRAS
GM-CSF Signaling	0.0165959	0.103	BCL2L1,RRAS2,PIK3C2A,PIK3R1,SOS2,GNB2L1,KRAS
Role of NANOG in Mammalian Embryonic Stem Cell Pluripotency	0.0169824	0.0877	IL6ST,LIFR,RRAS2,PIK3C2A,PIK3R1,SOS2,SMAD4,KRAS,SMAD5,FZD7
Sertoli Cell-Sertoli Cell Junction Signaling	0.017378	0.0718	SPTBN2,DLG1,RRAS2,MAP3K7,JAM3,SORBS1,PPAP2B,ZAK,KRAS,SYMPK,MAP3K4,TUBB,RAB8B,MAP3K2
Signaling by Rho Family GTPases	0.017378	0.0672	PIK3C2A,RHOC,PIK3R1,GNB2L1,PIKFYVE,RDX,CDC42EP3,ARHGEF1,PKN1,MYLK,RHOQ,RHOB,BAIAP2,PPP1R12B,GNB2,PPP1R12A,FNBP1
Glioma Signaling	0.0190546	0.0804	IGF2,MTOR,RRAS2,IGF1,PIK3C2A,PIK3R1,SOS2,KRAS,PRKD3
Non-Small Cell Lung Cancer Signaling	0.0194984	0.0886	RRAS2,PIK3C2A,PIK3R1,SOS2,KRAS,ITPR1,ERBB2
GNRH Signaling	0.0194984	0.0733	RRAS2,MAP3K7,EGR1,SOS2,ATF4,KRAS,ITPR1,MAP3K4,DNM1L,PRKD3,MAP3K2
Lipid Antigen Presentation by CD1	0.0194984	0.143	AP2M1,AP2A1,PSAP,AP2S1
Endometrial Cancer Signaling	0.0218776	0.105	RRAS2,PIK3C2A,PIK3R1,SOS2,KRAS,ERBB2
3-phosphoinositide Biosynthesis	0.0218776	0.0682	TNS3,PIK3C2A,PPP2R4,PIK3R1,PPTC7,PIKFYVE,PPP1R12A,IGBP1,PPP2R5E,RASA1,PTPRF,SACM1L
Pentose Phosphate Pathway (Non-oxidative Branch)	0.0239883	0.154	RPE,TKT
AMPK Signaling	0.0239883	0.0659	TAF9,MTOR,PPP2R1A,PIK3C2A,PPP2R4,FASN,PIK3R1,AK3,PRKAA1,PPM1A,PPP2R5E
Insulin Receptor Signaling	0.0239883	0.0775	MTOR,RRAS2,RHOQ,FOXO1,INPP5F,PIK3C2A,PIK3R1,SOS2,PPP1R12A,KRAS,PTPRF
GDNF Family Ligand-Receptor Interactions	0.0239883	0.0959	RRAS2,PIK3C2A,PIK3R1,SOS2,KRAS,ITPR1,RASA1
Superpathway of Inositol Phosphate Compounds	0.0245471	0.0614	PIK3C2A,PIK3R1,PPTC7,PIKFYVE,IGBP1,PTPRF,SACM1L,TNS3,INPP5F,PPP2R4,PPP1R12A,PPP2R5E,RASA1,PPIP5K2
Telomerase Signaling	0.0251189	0.0874	PPP2R1A,RRAS2,PIK3C2A,HSP90AB1,PPP2R4,PIK3R1,SOS2,KRAS,PPP2R5E
Cardiac Hypertrophy Signaling	0.025704	0.0656	PIK3C2A,RHOC,PIK3R1,GNB2L1,MEF2A,KRAS,MAP3K4,MTOR,RRAS2,RHOQ,RHOB,IGF1,MAP3K7,GNB2,FNBP1,MAP3K2
Systemic Lupus Erythematosus Signaling	0.0275423	0.064	RNU11,PRPF19,PIK3C2A,PRPF3,PIK3R1,SOS2,PRPF39,KRAS,PRPF38B,RNPC3,MTOR,RRAS2,NFAT5,PRPF4B,PRPF40A,PRPF38A
Aldosterone Signaling in Epithelial Cells	0.0275423	0.0714	DNAJC21,PIK3C2A,HSP90AB1,SLC12A2,PIK3R1,SOS2,PIKFYVE,HSPB8,KRAS,ITPR1,DNAJB14,PRKD3
p70S6K Signaling	0.0288403	0.0775	MTOR,PPP2R1A,RRAS2,PIK3C2A,PPP2R4,PIK3R1,SOS2,KRAS,PPP2R5E,PRKD3
Small Cell Lung Cancer Signaling	0.0301995	0.0787	BCL2L1,PIK3C2A,PIK3R1,CKS1B,PTGS2,CYCS,BIRC2
EGF Signaling	0.0301995	0.0968	MTOR,PIK3C2A,PIK3R1,SOS2,ITPR1,RASA1
FAK Signaling	0.0301995	0.0784	RRAS2,PIK3C2A,CSK,PIK3R1,SOS2,KRAS,VCL,CAPN7
RhoGDI Signaling	0.030903	0.0657	ARHGAP5,RHOQ,RHOB,RHOC,GNB2L1,PPP1R12B,GNB2,RDX,PIKFYVE,PPP1R12A,ARHGAP12,ARHGEF1,FNBP1
IL-17 Signaling	0.0316228	0.0946	RRAS2,PIK3C2A,MAP3K7,PIK3R1,IL17RC,KRAS,PTGS2
Prolactin Signaling	0.0338844	0.0875	RRAS2,PIK3C2A,PIK3R1,SOS2,KRAS,PRKD3,NR3C1
Virus Entry via Endocytic Pathways	0.0338844	0.0808	AP2M1,AP2A1,RRAS2,PIK3C2A,PIK3R1,KRAS,PRKD3,AP2S1
FLT3 Signaling in Hematopoietic Progenitor Cells	0.0363078	0.0921	MTOR,RRAS2,PIK3C2A,PIK3R1,SOS2,ATF4,KRAS
VEGF Signaling	0.0380189	0.0777	BCL2L1,RRAS2,FOXO1,PIK3C2A,PIK3R1,SOS2,KRAS,VCL
fMLP Signaling in Neutrophils	0.0389045	0.0698	NFAT5,RRAS2,PIK3C2A,PIK3R1,GNB2L1,GNB2,KRAS,ITPR1,PRKD3
Role of NFAT in Cardiac Hypertrophy	0.0416869	0.0628	IL6ST,RRAS2,IGF1,PIK3C2A,MAP3K7,PIK3R1,GNB2L1,SOS2,GNB2,MEF2A,KRAS,ITPR1,PRKD3
Estrogen Receptor Signaling	0.042658	0.0735	TAF9,H3F3A/H3F3B,RRAS2,NCOA2,SOS2,KRAS,RBFOX2,NR3C1,MED4,TAF9B
HMGB1 Signaling	0.042658	0.0808	RRAS2,RHOQ,PIK3C2A,RHOB,RHOC,PIK3R1,KRAS,FNBP1
Role of Tissue Factor in Cancer	0.042658	0.0783	BCL2L1,MTOR,YES1,RRAS2,PIK3C2A,PIK3R1,EGR1,KRAS,F3
Epithelial Adherens Junction Signaling	0.0436516	0.0748	RAP1B,YES1,RRAS2,SORBS1,BAIAP2,MYH9,KRAS,VCL,MYH11,TUBB,RAP1A
PDGF Signaling	0.0436516	0.0824	RRAS2,INPP5F,PIK3C2A,PIK3R1,SOS2,KRAS,RASA1
Chronic Myeloid Leukemia Signaling	0.0446684	0.0762	BCL2L1,RRAS2,PIK3C2A,PIK3R1,SMAD3,SOS2,SMAD4,KRAS
Estrogen-Dependent Breast Cancer Signaling	0.0457088	0.0833	RRAS2,IGF1,PIK3C2A,PIK3R1,ATF4,KRAS
GŒ±q Signaling	0.0467735	0.0655	RHOQ,PIK3C2A,RHOB,RHOC,CSK,PIK3R1,GNB2L1,GNB2,ITPR1,PRKD3,FNBP1
ERK5 Signaling	0.0489779	0.0923	IL6ST,RRAS2,MEF2A,ATF4,KRAS,MAP3K2
