# Supplementary material for: Global Transcriptome Analysis of Formalin-Fixed Prostate Cancer Specimens Identifies Biomarkers of Disease Recurrence
Source: Oxford University Press journal article supplement (doi:10.1158/0008-5472.can-13-2699), 2014-04-09
Supplement: 00085472can132699-sup-tab8.xlsx [file 00085472can132699-sup-tab8.xlsx]

## Sheet: Supplementary Table 8
Supplementary Table 8: Results of upstream activator and regulator IPA analysis based on the gene list in Supplementary Table 5.
Upstream Regulator	Molecule Type	p-value of overlap	Target molecules in dataset
sirolimus	chemical drug	1.59e-07	BCL2L1,CFLAR,COL1A1,COL1A2,CRAT,CYCS,EIF5,ERBB2,F3,FASN,GNB2L1,H3F3A/H3F3B,HIST1H4A (includes others),HNRNPU,HSP90AB1,ID2,IGF2,MAP1LC3B,MAP4K5,MAPK1IP1L,MCL1,MTOR,MYH11,NR3C1,NR4A3,ODC1,PIK3R1,PRNP,PTP4A1,RHOQ,RPS10,RPS19,RPS9,SIRT1,SLC2A3,SRSF3,TPM3,TUFM,VMP1,ZFP36
topotecan	chemical drug	1.73e-07	ATF3,CEBPZ,CFLAR,CHD1,EGR1,EGR3,ENG,GPX1,MAT2A,MBNL2,MCL1,NUP153,PRNP,PTGS2,SFPQ,SP3,SRSF3,TRAP1,UBE3A,VCL,XPO6
HIF1A	transcription regulator	5.02e-07	ADAM15,ADAMTS1,ATP2A2,BCL2L1,BGN,BHLHE40,BIRC2,BNIP3L,CCNT1,CD164,CTSD,ENG,ERBB2,FHL1,GAPDH,HIST1H1C,HIST1H2AC,HIST1H2BJ/HIST1H2BK,HIST1H4A (includes others),ID2,IGF2,IGFBP2,IGFBP3,ITPR1,LIFR,MAFF,MCL1,NAE1,NR4A3,PTGS2,SLC2A3,SLC39A7,TAF9B
Alpha catenin	group	9.92e-07	ADAMTS1,BCL2L1,BGN,COL15A1,COL1A1,COL1A2,COL3A1,ELN,ENG,FMNL2,IGF1,IGF2,IGFBP2,IGFBP7,IL6ST,NFKBIZ,PTGS2,RHOC
LY294002	chemical - kinase inhibitor	1.48e-06	ADAMTS1,ATF3,ATF4,BCL2L1,BHLHE40,CCNT2,CFLAR,COL1A1,COL1A2,DHCR24,EGR1,EGR2,EGR3,F3,FASN,HIST1H4A (includes others),HSP90AB1,IDE,IGF1,IGF2,IGFBP2,IGFBP3,KLF10,KRAS,MAP1LC3B,MCL1,MEF2A,MEIS2,MPDZ,MYEF2,MYH11,NFE2L2,NR4A3,NUP153,PIK3R1,PTGS2,PTN,RAP1A,RGS1,SATB1,SIRT1,SNTB2,ZFP36
dihydrotestosterone	chemical - endogenous mammalian	2.31e-06	APP,ATP2A2,AZGP1,BCL2L1,BTG2,COL3A1,DHCR24,DPP4,DYNC1LI2,EGR1,ELN,ERBB2,FAM89B,FASN,FOXO1,FTL,GAPDH,GOSR1,ID2,IGF1,IGFBP2,IGFBP3,IGFBP7,IL6ST,JAG1,MAFF,MYLK,NR3C1,ODC1,PER2,PRNP,PTGS2,RHOB,RPLP1,SELENBP1,SFRP4,SLC7A6,SMAD3,TACC2,TKT,TMPRSS2,TMSB10/TMSB4X,TP53INP2
PDGF BB	complex	2.58e-06	ATF3,ATP2A2,BHLHE40,CALD1,COL3A1,EGR1,EGR2,EGR3,F3,FASN,FHL1,GNB2L1,IGF1,IGF2,KLF10,KRAS,MAT2A,MCFD2,MCL1,MYH11,NR4A3,ODC1,PTGS2,QARS,RGS1,RHOB,RPL13,SLC2A3,SRSF7,TAF9,TRA2B,ZFP36
leukotriene D4	chemical - endogenous mammalian	4.66e-06	ADAMTS1,ATF3,EGR1,EGR2,EGR3,F3,MCL1,NEDD9,NR4A3,PTGS2,ZFP36
TP53	transcription regulator	1.04e-05	AP3B1,API5,APP,ARHGAP5,ATF3,ATF4,BCL2L1,BHLHE40,BIRC2,BTG2,CDC42EP3,CFLAR,CKS1B,CLIC4,COL1A1,COL1A2,COL3A1,CSK,CTDSP1,CTSD,CTSF,DHCR24,DLG1,DNM1L,DPP4,DSTN,EGR1,EGR3,ENG,ERBB2,F3,FASN,FDPS,FHL1,FOXO1,FRMD4A,GAPDH,GPX1,HSP90AB1,ID2,IGF1,IGF2,IGFBP2,IGFBP3,IGFBP7,LMAN2,LPP,MAP3K4,MAP4K5,MBNL2,MCL1,MCM7,MDH2,MDM4,MPDZ,MYH9,MYO1C,NUP153,OAT,PIAS2,PIK3R1,PLXNB2,PPM1A,PRNP,PSAP,PSMD2,PTGS2,PTP4A1,RBM34…
camptothecin	chemical toxicant	1.23e-05	API5,ARHGEF1,ATF3,BCL2L1,BIRC2,BNIP3L,BTG2,CFLAR,DLG1,DNM1L,EGR2,EHBP1,F3,FOXO1,FZD7,GAPDH,H2AFJ,H3F3A/H3F3B,HAUS3,IGFBP3,ITPR1,MAFF,MARK2,MBNL2,MCL1,MIR22HG,NR3C1,NUMA1,PKN2,PSD4,PSMD2,PTGS2,PTP4A1,RASA1,RDX,RHEB,SIAH1,SNTB2,STK17A,STK38L,TIAL1,TNS3,TPM1,TPM4,TRA2A,TSPYL2,TUBB,ZNF532
5-fluorouracil	chemical drug	1.38e-05	ATF4,ATG5,BIRC2,BNIP3L,CFLAR,COL1A2,CYCS,ECHS1,EGR1,EIF3G,FDPS,FOXF1,FOXO1,GAPDH,HSP90AB1,KRAS,MAT2A,MCL1,PSMD2,PTGS2,QARS,RHOB,SUB1,TMSB10/TMSB4X
FAS	transmembrane receptor	2.27e-05	API5,ARHGEF1,BCL2L1,BGN,BIRC2,CFLAR,COL15A1,COL1A1,COL1A2,COL3A1,COL4A2,EGR1,EGR2,F3,FOXO1,ITPR1,MARK2,MGP,NR3C1,NUMA1,PKN2,PSD4,PTP4A1,RASA1,RDX,RHEB,SNTB2,STK17A,STK38L,TIAL1,TPM1,TPM4,ZFP36
trichloroethylene	chemical toxicant	2.58e-05	BCL2L1,COL1A1,COL3A1,DHCR24,EGR1,ID2,IGFBP3,PTPRF,RHOB,RTN4,SOS2
benzene	chemical toxicant	2.58e-05	BCL2L1,COL1A1,COL3A1,DHCR24,EGR1,ID2,IGFBP3,PTPRF,RHOB,RTN4,SOS2
miR-1 (and other miRNAs w/seed GGAAUGU)	mature microRNA	3.09e-05	AGRN,AP3B1,ARHGAP29,ARID2,H3F3A/H3F3B,IGF1,INPP5F,KIF2A,KLHDC5,LIN7C,MEF2A,MGC27345,OAT,PTBP2,PTPRF,RNF138,TMSB10/TMSB4X,TPM1,TPM3,TPM4,XPO6,ZNF264
thapsigargin	chemical toxicant	3.29e-05	ATF3,ATF4,ATP2A2,BIRC2,CAPN7,COL1A1,CSK,EGR1,EGR2,ERBB2,IGF1,LBH,LIFR,LMAN2,MCL1,NFE2L2,UBXN4,VCL
ACO1	enzyme	4.9e-05	APP,FTL,GAPDH,IGF1,IGFBP3
methylmercury	chemical toxicant	6.69e-05	BCL2L1,COL1A1,COL3A1,DHCR24,EGR1,ID2,IGFBP3,PTPRF,RHOB,RTN4,SOS2
LDL	complex	7.21e-05	AP1G1,ATF3,ATP2A2,BCL2L1,CFLAR,EGR1,EGR3,ERBB2,F3,FDPS,IGF1,IGFBP2,IGFBP3,ITPR1,LIMS1,MCL1,NPC2,NR4A3,PTGS2,PTPRF,SMAD3,UBE2K,YES1
YY1	transcription regulator	7.25e-05	ALCAM,API5,ATF4,BCL2L1,BTG2,CHRDL1,COL15A1,COL1A1,ERBB2,FDPS,HIST1H4A (includes others),KIF5B,MAT2A,MCM7,MYH11,NR3C1,PNRC2,RAB8B,RLIM,SFPQ,SRSF1,SYNCRIP,TRA2A,WSB1
TOX	other	7.45e-05	FOXO1,ID2,ZBTB7B
CR1L	other	7.48e-05	BGN,COL15A1,COL1A1,COL1A2,COL3A1,COL4A2,MGP
trientine	chemical drug	8.11e-05	COL3A1,IGF1,IGFBP2,IGFBP3,SMAD4
TGFB1	growth factor	0.000114	AASS,ABI2,AMD1,APP,ATF4,ATG5,BCL2L1,BGN,BHLHE40,BNIP3L,CALD1,CDC42EP3,CKS1B,CLIC4,COL1A1,COL1A2,COL3A1,COL4A2,COTL1,COX5A,CTSD,DNPEP,EGR1,EGR2,EGR3,ELN,ENG,F3,FHL1,FNBP1,FOXO1,FTL,GNB2L1,HNRNPH1,HNRPDL,ID2,IGF1,IGF2,IGFBP2,IGFBP3,IGFBP7,ITPR1,JAG1,KLF10,KLF9,KRAS,LIFR,LIMS1,MAOA,MBNL2,MGEA5,MGP,MXI1,MYH11,MYH9,MYLK,MYO1C,NBEA,NEDD9,NET1,NFIB,NR4A3,NUP153,PDE4D,PLOD1,PRDX4,PTGS2,RAP1A,RASA1,RBMS3,…
Sos	group	0.000131	AFF4,CERS4,DDX3X,DLG1,EEA1,FBLIM1,HIPK3,HSPB8,KIF2A,KIF5B,KRAS,MAOA,MYH9,NET1,NFE2L2,ODC1,PKN1,PRPF4B,PTGS2,TAOK1,ZAK
EGF	growth factor	0.000137	ALCAM,ATF3,ATP2A2,BCL2L1,BIRC2,BTG2,CFLAR,COL1A1,COL1A2,COL3A1,CTSD,DPP4,EGR1,EGR2,EGR3,ERBB2,FAM89B,FASN,ID2,IGF1,IGF2,IGFBP2,IGFBP3,KLF10,KRAS,MCL1,NCOA2,NR4A3,ODC1,PPAP2B,PTGS2,RHOB,SMAD3,TUFM,VCL,ZFP36
GAST	other	0.000155	EGR1,HNRPDL,IMPDH2,JAG1,MDH2,MYLK,ODC1,PIK3R1,PTGS2,RPS19,SPOP
PTEN	phosphatase	0.000159	ARHGAP5,BTG2,CKS1B,COX5A,DEGS1,DYNC1LI2,EGR2,F3,FAM134C,FASN,FOXO1,IGF2,IGFBP2,IGFBP3,JAG1,LIMS1,LRRFIP1,LZTR1,MAT2A,MCL1,MTOR,PIK3R1,PLOD1,PTGS2,PTN,RAP1A,RPL36A/RPL36A-HNRNPH2,SEC23A,SMAD4,SRSF10,STX5,TMSB10/TMSB4X
TCOF1	transporter	0.000176	ARIH1,BCLAF1,BNIP3L,CEBPZ,DDX42,GPBP1,HNRPDL,NOLC1,PPIG,PRPF40A,RASA1
bexarotene	chemical drug	0.000191	BNIP2,CYCS,EGR3,ITPR1,KLF10,MAFF,ODC1,PER2,PIK3R1,PNRC1,PTGS2,SMAD5,VAMP8
metribolone	chemical reagent	0.000198	ADAMTS1,APP,AZGP1,DHCR24,EGR1,FASN,FDPS,FGFRL1,FOXO1,HNRNPA3,IGF1,LIFR,MAOA,PJA2,TACC2,TMPRSS2
Lh	complex	0.000217	ADAMTS1,ATP2A2,ATPIF1,BNIP3L,CFLAR,COL15A1,ITPR1,KIDINS220,MAP1LC3B,MAP3K7,MCL1,NPC2,PDE4D,PPP2R1A,PSIP1,PTGS2,PTP4A1,PTPRF,RHOB,SFRP4,STK17A,TPM1,VCL
obatoclax	chemical drug	0.000289	ATF3,ATF4,MCL1
CITED1	transcription regulator	0.000289	ERBB2,IGF1,IGF2
GLI1	transcription regulator	0.000331	COL1A1,DEGS1,EGR3,FHL1,GOSR1,HNRNPU,HNRNPU-AS1,ID2,IGF1,IGF2,IGFBP7,PLOD1,RHOB,SCD5,SDHA,SESN3,SH3GLB1,TUFM
PRL	cytokine	0.000358	APP,COL1A1,COL1A2,COL3A1,CTSD,EGR1,ERBB2,HIPK3,ID2,IDE,IGF2,IGFBP3,MAGED1,MGP,ODC1,PARM1,SFRP2,SND1,TMSB10/TMSB4X,TPM3
dexamethasone	chemical drug	0.000361	ABHD2,ADAM15,ADAMTS1,AEBP1,ALCAM,AP1G1,APP,ARL5B,ARMC8,ATF4,ATP2A2,BCL2L1,BCLAF1,BGN,BHLHE40,BIRC2,CDC42EP3,CFLAR,CLIC4,COL15A1,COL1A1,COL4A2,CRISPLD2,CTSD,DAP3,DHCR24,DLG1,EGR1,EGR2,EGR3,EIF5,ELN,F3,FAM89B,FLJ31306,FOXO1,FTL,GAPDH,GPX1,HNRNPH1,ID2,IDE,IFITM3,IGF1,IGF2,IGFBP2,IGFBP3,IL6ST,IRAK1,ITPR1,JAG1,KLF9,LAPTM5,LUC7L3,MAOA,MAT2A,MCL1,MCM9,MGP,MTOR,NEBL,NET1,NFKBIZ,NKTR,NR3C1,ODC1,PABPC1,PER…
diazoxide	chemical drug	0.000385	BCL2L1,CYCS,EGR1,FASN,ODC1,SLC39A7
PTH	other	0.00048	ADAMTS1,ATP2A2,BHLHE40,CGNL1,COL1A1,COL1A2,EGR2,IGF1,IGFBP3,MGP,ODC1,PTGS2,RGS1,SFRP2,SFRP4,SMAD3
curcumin	chemical drug	0.000497	AKR1A1,APP,BCL2L1,BIRC2,CFLAR,COL1A1,COL1A2,CRY2,EGR1,EIF3H,ERBB2,F3,FKBP8,FTL,HELZ,KLF9,MCL1,MTOR,NFE2L2,PTGS2,PTN,QARS,RGL2,SP3,TACC2,TPT1
EPHB1	kinase	0.000536	EGR1,EGR2,IL6ST,PTGS2
MSTN	growth factor	0.000549	HIST1H4A (includes others),IGF1,IGF2,KLF10,MEF2A,MTOR,SMAD3
thyroid hormone	chemical - endogenous mammalian	0.000657	ATF4,ATP2A2,BTG2,CRAT,EGR1,FASN,FDPS,HSP90AB1,IGF1,IGFBP2,IGFBP3,KLF3,KLF9,OAT,PGD,PIAS2,PPM1A,TMSB10/TMSB4X
staurosporine	chemical - kinase inhibitor	0.00067	BCL2L1,BTG2,COL1A1,COL1A2,IGF1,IGF2,KLF10,MCL1,NEDD9,ODC1,PTGS2,SMAD3,USP12
cisplatin	chemical drug	0.000694	ADAMTS1,ATF3,ATF4,BCL2L1,BIRC2,BNIP3L,BTG2,C5orf44,CFLAR,COL1A1,EGR1,EPS8L2,F3,FASN,FBLIM1,HIST1H4A (includes others),ID2,IGFBP3,IL6ST,LRP6,MAML2,MAOA,MBNL2,MGP,MIER3,OAT,ODC1,PSMD4,PURB,RABGAP1,REV3L,RPS9,SIRT1,SLC15A2,SLC25A36,SLC2A3,SLC31A1,SLC7A6,STK17A,TMSB10/TMSB4X,TUBB,ZNF33A
miR-142-3p (miRNAs w/seed GUAGUGU)	mature microRNA	0.000699	BCL2L1,BCLAF1,LIFR
BAG3	other	0.000699	BCL2L1,MAP1LC3B,MCL1
FOS	transcription regulator	0.000729	AFF4,ATF3,CD164,CERS4,CFLAR,COL1A1,DDX3X,DLG1,EEA1,EGR1,EGR2,F3,FBLIM1,HIPK3,HSPB8,KIF2A,KIF5B,MAOA,MYH9,NAE1,NET1,NFE2L2,ODC1,PKN1,PRPF4B,PTGS2,PTP4A1,RPS9,SELENBP1,SFRP2,SFRP4,SMAD5,TAOK1,TUBB,ZAK,ZNF33A
MYC	transcription regulator	0.000731	ALCAM,AMD1,ATPIF1,BCL2L1,BIRC2,CFLAR,CLIC4,CLUH,COL15A1,COL1A1,COL1A2,COL3A1,COL4A2,CTSD,CYCS,DDX17,DDX3X,DSTN,EGR2,EIF3G,ERAP1,ERBB2,F3,FASN,GAPDH,HIST1H4A (includes others),HNRNPH1,ID2,KLF10,KRAS,LIMS1,MAT2A,MCM7,MGP,MYO1C,NDEL1,NOLC1,OAT,ODC1,PRDX4,PTN,RHOB,RPL13,RPS19,RPS9,SCAMP1,SLC2A3,SLC38A1,SP3,TKT,TMSB10/TMSB4X,TNS3,TRAP1,ZFP36
FSH	complex	0.000737	ADAMTS1,ATP2A2,ATPIF1,BNIP3L,BTG2,CFLAR,COL15A1,IGFBP3,ITPR1,KIDINS220,KIF5B,KLF10,LZTR1,MAP1LC3B,MAP3K7,MCL1,NPC2,PPP2R1A,PRNP,PSIP1,PTGS2,PTP4A1,PTPRF,RHOB,SMAD4,SMAD5,STK17A,TPM1,VCL,ZNF331
HOXA9	transcription regulator	0.000806	CBX6,DYNC1LI2,HNRNPU,ID2,IGF1,LYZ,MAP4K5,NFIA,PRKD3,RAP1B,RDX,SATB1,SRSF11,TACC1,TMSB10/TMSB4X,WSB1,YES1
quinacrine	chemical drug	0.000814	BCL2L1,BIRC2,CFLAR,MCL1
wortmannin	chemical - kinase inhibitor	0.000904	BCL2L1,CFLAR,COL1A1,COL1A2,COL3A1,EGR1,F3,FASN,IDE,IGF1,KRAS,MCL1,MYH11,NFE2L2,NR4A3,PTGS2,RAP1A,TPM1
IGFBP5	other	0.000931	BCL2L1,BHLHE40,COL1A1,F3,IGF1
HNF4A	transcription regulator	0.000984	AASS,ANKHD1,AP2A1,AP3B1,AP3M1,APH1A,ARMC8,ATF4,ATF6B,BAZ1A,BCL2L1,BCLAF1,BLOC1S1,BTRC,C22orf28,C5orf44,CCNT1,CDC42EP3,CHMP1B,CLDND1,CRAT,CSK,CTDSPL2,CYLD,DIS3,EGR1,EIF5,EPM2AIP1,FBXW2,FDPS,FEM1C,FGF13,FHL1,FOXJ3,FOXO1,GAPDH,GGCX,GPX1,HBS1L,HIST1H4A (includes others),HIST2H2BE (includes others),HOOK3,IGF1,IL6ST,IVNS1ABP,LATS1,LIMS1,LIN7C,LZTR1,MAGOH,MAOA,MAP3K7,MAT2A,MDH2,MGEA5,MRPL24,MTRF1L,N4BP2…
Insulin	group	0.000995	AEBP1,APP,BCL2L1,CFLAR,EGR1,FASN,FOXO1,FTL,IGF1,IGF2,IGFBP2,IGFBP3,MCM7,MDH2,MGEA5,NR4A3,ODC1,PER2,PIK3R1,SIRT1,SLC25A27,SLC2A3,SORBS1,SRSF3
MYCN	transcription regulator	0.000999	CCNT1,COL1A1,GAPDH,HSP90AB1,ID2,IGFBP7,MSRB3,MXI1,MYH9,ODC1,RPL13,RPLP1,RPS19,RPS20,RPS9,TERC,TMEM109,TPM1,TUBB,TUFM,WAC
NR3C1	ligand-dependent nuclear receptor	0.00103	ABHD2,APP,ATP6AP1,BCL2L1,BHLHE40,BIRC2,BNIP3L,BRWD1,C1R,CDC42EP3,CKS1B,DEGS1,EGR1,F3,FAM89B,FOXO1,GPX1,HNRNPU,HSP90AB1,IGF1,KLF9,MAOA,MAP3K7,MCL1,MDM4,NR3C1,OAT,PDCD7,PIK3R1,PRPF40A,PTGS2,RBMS3,RHOB,RNF11,RNF38,RTN4,SH3GLB1,SIAH1,SLC38A1,TADA3,UBE2K,ZAK
D-glucose	chemical - endogenous mammalian	0.00104	ATF3,ATF4,ATP2A2,BCL2L1,CALD1,CFLAR,COL1A1,COL3A1,EGR1,FASN,GAPDH,HIST1H4A (includes others),IGF1,IGF2,IL6ST,ITPR1,KLF10,MDH2,MTOR,NFE2L2,NR3C1,NR4A3,OAT,ODC1,PTGS2,RAP1B,SEC61A1,SIAH1,SIRT1,SLC39A7,SORBS1,SRSF1,TKT
PGR	ligand-dependent nuclear receptor	0.00105	ADAMTS1,AMD1,BCL2L1,BIRC2,CALD1,ERBB2,F3,FAM89B,KLF9,NEDD9,NET1,PTGS2,PTP4A1,SNTB2,SRSF7
HTT	transcription regulator	0.00108	AGRN,AMD1,APP,ARPP19,ATF3,ATP2A2,ATP6V0E2,BAIAP2,BHLHE40,BIRC2,C1R,CLOCK,COL4A2,CTDSP1,CTSD,EGR1,EGR2,FASN,FDPS,FHL1,GAPDH,HSP90AB1,IGF2,ITPR1,KLF9,MDH2,MEIS2,MGP,MTOR,NAA15,NCS1,NFE2L2,NFIB,PER2,PURB,SATB1,SDHA,SFPQ,SLC12A2,SLMAP,SP3,SPTBN2,TMSB10/TMSB4X,TRAP1,TUBB,UBE3A,UQCR11
HGF	growth factor	0.00117	ADAMTS1,ATF3,BCL2L1,BIRC2,CFLAR,CHD2,CKS1B,COL1A2,COL3A1,CUL3,DDX3X,EGR1,F3,IGF1,IGFBP3,IL17RC,IL6ST,ITPR1,LATS1,MAT2A,MCL1,NCOA2,NOLC1,NR4A3,NUMA1,ORC2,PLOD1,PNRC1,PPAP2B,PRKAA1,PTGS2,PTPRF,RHOB,SLK,SMAD5
leukotriene C4	chemical - endogenous mammalian	0.00118	EGR1,EGR2,EGR3,PTGS2
dasatinib	chemical drug	0.00118	BCL2L1,COL1A1,COL1A2,MCL1
prednisolone	chemical drug	0.00118	API5,APP,ATG5,BCL2L1,BIRC2,BNIP2,CFLAR,GABARAPL1,IGF1,KANSL1L,KLF9,MAP1LC3B,MCL1,MYH9,NR3C1,PRKAA1,PRNP,PTGS2,RNF38,ZBTB16
IL3	cytokine	0.00122	AKR1A1,ARHGAP29,ARHGEF1,BCL2L1,BNIP3L,BTG2,CEBPZ,CRAT,EGR1,EGR2,EGR3,EIF3G,FASN,GPX1,IMPDH2,KLF9,MCL1,MYO1C,NEDD9,ODC1,RPL13,RPS19,SLC2A3,SMAD4,SMAD5,TIAL1
miR-21-5p (and other miRNAs w/seed AGCUUAU)	mature microRNA	0.00122	BTG2,HIPK3,IRAK1,JAG1,LRRFIP1,NFIB,PIK3R1,TPM1
2-deoxyglucose	chemical drug	0.00122	APP,ATF4,BCL2L1,BIRC2,CFLAR,GPX1,MCL1,PTGS2
RUVBL1	transcription regulator	0.00127	ADAM15,CCNT1,HIST1H2BJ/HIST1H2BK,HIST1H4A (includes others),IGFBP3,NAE1,SLC39A7
KRAS	enzyme	0.00127	ABCC5,AGRN,ATG5,BCL2L1,BGN,COL1A1,COL3A1,EIF5,ELN,F3,IGF2,IGFBP2,KRAS,LBH,MAP1LC3B,MYLK,NDE1,NR3C1,PALLD,PRDX4,PTGS2,RHOB,RHOC,TMEM109,VMP1
SERCA	group	0.00135	BTG2,EGR1,ZFP36
Stat5 dimer	complex	0.00135	IGF1,IGF2,IGFBP3
mir-19	microRNA	0.00135	HIPK3,PPP2R5E,PRKAA1
beta-estradiol	chemical - endogenous mammalian	0.00154	ABCC5,AEBP1,AGRN,AP1G1,APP,ATF3,BAZ1A,BCL2L1,BHLHE40,BNIP2,BNIP3L,BTG2,CBX6,CCNT2,CKS1B,COL1A1,COL1A2,COL3A1,COX5A,CTSD,DDX17,EGR1,EGR2,EGR3,EIF3G,EIF3J,ERBB2,F3,FAAH,FAM105B,FAM134C,FASN,FNBP1,FOXO1,GNE,GPX1,HIST2H2BE (includes others),HSP90AB1,HSPB8,ID2,IDE,IGF1,IGF2,IGFBP2,IGFBP3,IL6ST,JAG1,KLF10,KLF9,KPNA4,KRAS,MAOA,MCM7,MEF2A,MEIS2,MGP,MPDZ,MYLK,NCOA2,NEDD9,NR3C1,NR4A3,ODC1,OGN,PIK3C2A,PIK3R…
CTGF	growth factor	0.00157	ADAMTS1,BCL2L1,BIRC2,CFLAR,COL1A1,COL4A2,IGF1,LIMS1,MBNL2,SFRP4
WT1	transcription regulator	0.00157	BCL2L1,BTAF1,CD2AP,CLIC4,DDX3X,EGR1,FDPS,IGF1,IGF2,KRAS,MCL1,ODC1,SRSF6,ZMIZ1
DDR1	kinase	0.00165	BCL2L1,COL1A1,COL3A1,ELN
SAT1	enzyme	0.00165	GAPDH,IGFBP2,IGFBP3,KLF9
farnesyl pyrophosphate	chemical - endogenous mammalian	0.00165	APP,FASN,PTGS2,SMAD3
AR	ligand-dependent nuclear receptor	0.00174	AK3,AMD1,ATP2A2,AZGP1,CFLAR,COL3A1,DHCR24,EGR1,ERBB2,FAM89B,IGF1,IGF2,IGFBP3,IMPDH2,MAOA,NR3C1,ODC1,RHOB,SLC2A3,SMAD3,TACC2,TMPRSS2,VCL
PM 02734	chemical drug	0.00177	ATG5,MAP1LC3B
MXD4	transcription regulator	0.00177	ID2,ODC1
BMP1	peptidase	0.00177	IGFBP3,OGN
SNF8	enzyme	0.00177	VPS25,VPS36
TNK1	kinase	0.00177	APP,RAP1A
lanreotide	chemical drug	0.00177	IGF1,IGFBP3
S-adenosylhomocysteine	chemical - endogenous mammalian	0.00177	COL1A1,COL1A2
miR-16-5p (and other miRNAs w/seed AGCAGCA)	mature microRNA	0.00182	DMTF1,ECHDC1,H3F3A/H3F3B,HDHD2,MCL1,NAA15,NFIA,PNN,PTGS2,RTN4,SHOC2,SLC12A2,SLC35A1,SLC38A1,TIA1,TMEM109,TPM3
5-azacytidine	chemical drug	0.00182	COL1A1,F3,MAFF,MCL1,MEF2A,N4BP2L2,PNRC1,PTGS2,SP3,STK17A,TERC,TUBB
SEMA7A	transmembrane receptor	0.0019	COL1A1,COL1A2,COL3A1,EGR1,ELN
SUPT16H	transcription regulator	0.0019	AP1G1,EGR1,HIST1H1C,HIST1H2AC,ID2
SRF	transcription regulator	0.00191	AMD1,BCL2L1,CALD1,CYLD,DSTN,EGR1,EGR2,EGR3,FAM60A,FHL1,IGF1,LBH,MCL1,MYH11,MYH9,MYLK,OPHN1,PTGS2,SCYL1,SHOC2,SND1,SPTBN2,VCL,ZMYM2
KNG1	other	0.00194	APP,COL1A1,COL1A2,IDE,IGF1,PTGS2
acetaldehyde	chemical - endogenous mammalian	0.00223	COL1A1,COL1A2,KLF9,SIRT1
gossypol	chemical toxicant	0.00223	ATF3,ATF4,BCL2L1,CFLAR
acadesine	chemical drug	0.00223	EGR1,F3,FASN,PTGS2
SNED1	other	0.0023	GAPDH,IGF1,IGFBP3
MIR101	group	0.0023	IGF1,MCL1,PTGS2
miR-140-5p (and other miRNAs w/seed AGUGGUU)	mature microRNA	0.0023	DNPEP,EGR2,SMAD3
IGFBP4	other	0.0023	IGF1,IGFBP3,MYH11
NFE2L2	transcription regulator	0.00238	AKR1A1,ATF4,BCL2L1,CLPTM1L,COL1A1,COL3A1,COL4A2,COQ7,CTSD,DSTN,EIF3G,ELN,FGF13,FTL,GNB2L1,GPX1,HSP90AB1,IDE,MAFF,MCFD2,NFE2L2,OAT,PGD,PTGS2,SEC23A,SEC61A1,TUB,UBE2K
forskolin	chemical toxicant	0.00258	ADAMTS1,APP,ATF3,ATP6V0D1,BHLHE40,BNIP3L,BTG2,COL15A1,COL1A1,CRISPLD2,DNM1L,EGR1,H3F3A/H3F3B,ID2,IGF1,IGF2,IGFBP3,ITPR1,KIDINS220,MAP1LC3B,MAT2A,NCOA2,NPC2,NR4A3,ODC1,PDE4D,PPP2R1A,PTGS2,PTP4A1,PTPRF,RHOB,RPS10,RPS20,SMAD3,STK17A,TPM1,VCL,ZNF331
ELAVL1	other	0.0026	ATF3,GNB2L1,PTGS2,QARS,RPL13,SRSF7,TAF9,TIA1,ZFP36
Mapk	group	0.00276	APP,BCL2L1,CFLAR,COL1A1,EGR1,F3,IGF1,NR3C1,NR4A3,PER2,PTGS2
miR-124-3p (and other miRNAs w/seed AAGGCAC)	mature microRNA	0.00278	ARHGAP29,ARHGEF1,CD164,CLDND1,CTDSP1,DHCR24,EGR1,FAM177A1,JAG1,MAPK1IP1L,MYH9,NAA15,PTBP2,QSER1,RDH10,RNPEPL1,SMAD5,TEAD1,TMEM109
fenretinide	chemical drug	0.00285	AP2M1,BIRC2,CFLAR,ENAH,IGF1,IGFBP7,PTGS2,XPA
COL4A3	other	0.00286	COL1A1,COL1A2,COL3A1,COL4A2,PTGS2
GNA12	enzyme	0.00287	ARHGEF1,BAIAP2,MYH11,PIK3R1,PTGS2,RDX,RRAS2,SOS2,VCL
IL1R1	transmembrane receptor	0.00293	ABCC5,EGR1,FAM89B,IGF1,LIFR,MYH11,PTGS2
1'-acetoxychavicol acetate	chemical reagent	0.00294	BCL2L1,BIRC2,CFLAR,PTGS2
lactacystin	chemical - protease inhibitor	0.00303	APP,ATF3,CFLAR,CTSD,FOXO1,FTL,HSPB8,NCOA2,NCS1,NEDD9,NFE2L2,NR3C1,PTGS2,SIAH1,SMAD4,SNTB2,SUB1
ELK1	transcription regulator	0.00313	EGR1,EGR2,MCL1,MYLK,PTGS2,ZFP36
miR-29b-3p (and other miRNAs w/seed AGCACCA)	mature microRNA	0.00317	COL15A1,COL1A1,COL1A2,COL3A1,COL4A2,MCL1,PIK3R1,SRSF10
IGF2	growth factor	0.00318	EGR1,EGR2,IGF1,IGF2,IGFBP2,IGFBP3,KLF9,MCM7,MXI1,OGN,PIK3R1,PTGS2,RHOB,SATB1,XRN1
ramipril	chemical drug	0.00345	COL1A1,COL1A2,COL3A1,COL4A2,PTGS2
nilotinib	chemical drug	0.00356	BCL2L1,COL1A1,COL1A2
Ck2	complex	0.00356	ATF4,BCL2L1,ZFP36
mechlorethamine	chemical drug	0.00356	ATF3,ID2,NFE2L2
RP 73401	chemical toxicant	0.00356	BTG2,EGR1,VCL
VHL	transcription regulator	0.00359	ATF4,BCL2L1,BHLHE40,EIF5,F3,FTL,GPX1,IFITM3,MXI1,NEDD9,RAP1B,TMED3
BMP7	growth factor	0.00359	AP2A1,COL1A1,COL1A2,F3,FASN,ID2,IGF1,IGF2,IGFBP3,MYO1C,PIK3R1,SMAD5
miR-30c-5p (and other miRNAs w/seed GUAAACA)	mature microRNA	0.00378	AP2A1,ATP2A2,CHD1,MAT2A,NUFIP2,PPP2R4,PRPF40A,SEC23A,SLC38A1,TMED3,TNRC6A
Rock	group	0.00417	APP,COL1A1,COL3A1,F3,LPP,PPP1R12A
FGF2	growth factor	0.00438	ATF4,BCL2L1,BGN,BTG2,CFLAR,COL1A1,COL1A2,COL3A1,EGR1,ELN,F3,FOXO1,IGF1,IGF2,IGFBP2,IGFBP3,KRAS,LRP6,MGP,NR3C1,ODC1,PPP1R12A,PTGS2,TMSB10/TMSB4X
NR3C2	ligand-dependent nuclear receptor	0.00455	ADAMTS1,BCL2L1,COL1A1,COL3A1,EGR1,GPX1,NFIA,NR3C1,PTGS2,TACC2
salicylic acid	chemical drug	0.00473	BCL2L1,BGN,CFLAR,CUL3,F3,MCL1,PTGS2
methyl methanesulfonate	chemical toxicant	0.00478	ATF3,BTG2,CTSD,EGR1,MCL1,PLXNB2
CDC73	other	0.0048	APP,HIST1H1C,IGF1,IGF2
APP	other	0.00513	APP,BCL2L1,C1R,CFLAR,CTSD,CUL3,DNM1L,DPY19L3,DSTN,EGR1,ELN,ENG,ERBB2,FZD7,GAPDH,H2AFJ,HNRNPA3,HSP90AB1,IDE,IGF1,IGF2,IGFBP2,IL6ST,KIF2A,LATS1,LRP6,MAP3K7,NDUFB11,OGN,PIK3R1,PPP2R1A,PPP2R4,PRNP,PTGS2,RUFY2,SATB1,SIRT1,SNX14,TAF9,TPM1,TPM3,TPT1,TUBB,TUFM,UBE2K
Tropomyosin	group	0.00517	TPM1,TPM3
miR-153 (and other miRNAs w/seed UGCAUAG)	mature microRNA	0.00517	FOXO1,MCL1
TPM1	other	0.00517	CALD1,TPM1
GFRA2	transmembrane receptor	0.00517	EGR1,EGR2
CASP8AP2	transcription regulator	0.00517	CFLAR,MCL1
MXD3	transcription regulator	0.00517	ID2,ODC1
pyridoxal phosphate	chemical - endogenous mammalian	0.00517	COL1A1,NR3C1
delta-9-tetrahydrocannabinol	chemical drug	0.00528	ALCAM,BIRC2,CFLAR,HIST1H4A (includes others),HIST2H2BE (includes others),RPS9,TRIM38
IRS1	enzyme	0.0054	AP2A1,COL3A1,COL4A2,EGR1,FASN,FHL1,ID2,IGF1,PIK3R1,PPAP2B,PTPRF,SFRP2
rasagiline	chemical drug	0.00546	APP,BCL2L1,EGR1,EGR3,GNB2L1,PIK3R1
vincristine	chemical drug	0.00546	BCL2L1,EGR1,HSP90AB1,IGF1,MCL1,PTGS2
SMAD3	transcription regulator	0.00549	ABI2,BGN,COL1A1,COL1A2,COL3A1,EGR1,ELN,ENG,JAG1,NET1,RHOB,SMAD3,SMAD5,TPM1,TPM3,ZFP36
ERK	group	0.0056	BCL2L1,BGN,BTG2,COL1A1,COL3A1,EGR1,FOXO1,JAG1,KLF10,MAFF,MCL1,MYLK,NFE2L2,NFKBIZ,ODC1,PTGS2,ZFP36
miR-27a-3p (and other miRNAs w/seed UCACAGU)	mature microRNA	0.00575	FOXO1,ODC1,SMAD3,SMAD4,SMAD5
INSR	kinase	0.00594	ATF3,CEBPZ,CRAT,ECHS1,EGR1,EGR2,FASN,FHL1,GAPDH,IDH3A,IGF1,KLF10,KLF9,MAP3K7,MCM7,MDH2,MXI1,NFE2L2,OGN,RHOB,SATB1,SIRT1,SMAD4,XRN1
miR-23a-3p (and other miRNAs w/seed UCACAUU)	mature microRNA	0.00596	MDH2,SMAD3,SMAD4,SMAD5
NFKBIA	transcription regulator	0.00612	AEBP1,AZGP1,BCL2L1,BIRC2,BTG2,CFLAR,CKS1B,COL1A2,COL3A1,CSK,CTSF,DDX3X,ERAP1,ERBB2,F3,FZD7,IGF2,IRAK1,ITPR1,LIFR,MGP,OGN,PIK3R1,PTGS2,SERINC1,SLC12A2,SMAD4,TMSB10/TMSB4X,UBE3A
CCND1	other	0.00619	AZGP1,BRWD1,DHCR24,ERBB2,FZD7,H2AFJ,HIST1H4A (includes others),HIST2H2BE (includes others),HSPB8,LOC729678,MAFF,MCM7,MYLK,RBMS3,SATB1,SELENBP1,TMPRSS2,TP53INP2
Laminin	complex	0.00619	APP,COL1A1,ID2,IGF2,PTGS2,PTPRF
PTX3	other	0.00671	EGR2,EGR3,F3,IGF1,IRAK1
VTN	other	0.00671	BHLHE40,COL1A1,COL1A2,F3,PTGS2
SMAD4	transcription regulator	0.0069	BGN,CDC42EP3,COL1A2,ENG,ERBB2,ID2,JAG1,MTOR,NUP153,SAE1,SMAD3,SMAD4,TPM1,TPM3,ZFP36
progesterone	chemical - endogenous mammalian	0.00711	ADAMTS1,AEBP1,ATF3,BCL2L1,BHLHE40,COL15A1,CTSF,DPP4,ENG,ERBB2,F3,FAAH,FAM105B,FOXO1,GABARAPL1,IDE,IGF1,IGFBP2,IGFBP3,KLF10,KLF9,MAOA,NET1,PARM1,PER2,PIK3R1,PPAP2B,PRNP,PTGS2,RAP1B,SFRP4,SLC2A3
CD44	enzyme	0.00715	BCL2L1,BGN,BIRC2,COL1A1,CTDSP1,ERBB2,HSP90AB1,MCL1,MGEA5,PPAP2B,WBP2
trypsin	group	0.00716	ELN,F3,PTGS2
NQO2	enzyme	0.00716	BIRC2,CFLAR,PTGS2
AFP	transporter	0.00716	EGR1,EGR2,PTP4A1
PIK3R1	kinase	0.00725	BCL2L1,COL1A2,ENG,F3,FOXO1,PIK3R1,PTGS2
RHOJ	enzyme	0.00731	ATP2A2,MYH9,PPP2R1A,PTN
GNRH	group	0.00731	ATF3,EGR1,PTGS2,RAP1B
IGF2BP1	translation regulator	0.00731	COL1A1,COL1A2,IGF2,KRAS
leuprolide	biologic drug	0.00731	APP,CFLAR,EGR1,SMAD4
deferoxamine	chemical drug	0.00747	AK3,APP,BHLHE40,EGR1,ELN,F3,FASN,IGF1,IGFBP2,IGFBP3,MAP1LC3B,SLC2A3,SMAD4
ERBB3	kinase	0.00751	BGN,COL1A1,EGR1,ERBB2,F3,IGF2,MXI1,PTGS2,SLK
IGF1	growth factor	0.00761	APP,BCL2L1,BGN,BHLHE40,CFLAR,COL1A1,CTSD,EGR1,EGR2,ELN,F3,FASN,FOXO1,GAPDH,ID2,IGF1,IGF2,IGFBP2,IGFBP3,MCL1,MYH11,ODC1,SEC23A,SIRT1,SRSF3
TGFBR2	kinase	0.00764	ATF4,BGN,BHLHE40,CLIC4,COL1A1,COL1A2,KRAS,NFIB,RBMS3,SLC2A3,SMAD3,SMAD4,UBE3A,VCL,ZMIZ1
PAX3	transcription regulator	0.00776	APP,BCL2L1,COL1A2,EGR2,F3,FHL1,HNRNPA3,ID2,IGFBP2,MGP,NEDD9,NPC2,PTP4A1,RHOB,SRSF3,TIA1
SSRP1	other	0.00778	AP1G1,EGR1,HIST1H1C,HIST1H2AC,ID2
etoposide	chemical drug	0.00791	ATF3,BCL2L1,BIRC2,CFLAR,COL1A2,CTSD,CYCS,FASN,FOXF1,ID2,LPAR6,MCL1,SLC2A3
GSK3B	kinase	0.00877	APP,ATP2A2,BCL2L1,BIRC2,CFLAR,MCL1,NFKBIZ,PTGS2,SH3GLB1
FASN	enzyme	0.00883	ERBB2,FASN,FOXO1,PTGS2
HOXA5	transcription regulator	0.00883	EGR1,IGF1,KLF10,PTN
ARRB1	other	0.00883	EGR1,F3,FASN,PTGS2
doxorubicin	chemical drug	0.00912	ADAMTS1,APP,ATF3,ATP2A2,BCL2L1,BHLHE40,BIRC2,BNIP3L,BTG2,COL3A1,CTSD,EGR1,ERBB2,F3,ID2,IGFBP7,JAG1,MBNL2,MCL1,PSAP,PTGS2,SMAD3,SMAD4,TUBB
mono-(2-ethylhexyl)phthalate	chemical toxicant	0.00915	ECHS1,EIF3J,FASN,GAPDH,IDH3A,KIF5B,MDH2,NFIB,PPTC7,SDHA,SS18,TARDBP,TKT,VCL
lovastatin	chemical drug	0.00924	ATF3,ATF4,BCL2L1,COTL1,FASN,FDPS,MCL1,PTGS2,RHOB,RHOC,SMAD3
mir-199	microRNA	0.00954	MTOR,SIRT1,SMAD4
IGFBP1	other	0.00954	BCL2L1,IGF1,IGFBP3
DSP	other	0.00954	COL1A1,COL1A2,COL3A1
OSM	cytokine	0.0097	ABCC5,ADAMTS1,BAIAP2,BHLHE40,C1R,CHD1,COL3A1,DEGS1,DHCR24,DNM1L,F3,HIPK3,HMG20B,ID2,IL6ST,IRAK1,JAG1,KIF5B,KLF10,LIFR,LRRFIP1,MAGED2,MAOA,MCM7,MYEF2,PTP4A1,RBFOX2,RORA,SLC39A7,SMAD4,SMAD5,TPM1,ZC3HAV1
IGFBP2	other	0.00989	CHD9,IGFBP2,IGFBP3,MALAT1,NEDD9,RBMS3
TFAP2C	transcription regulator	0.00989	EGR3,ERBB2,HIST1H1C,JAG1,RASA1,TACC1
3,3'-diindolylmethane	chemical drug	0.00989	ATF3,BCL2L1,ERBB2,FASN,MAP1LC3B,PTGS2
PD 180970	chemical - kinase inhibitor	0.01	BCL2L1,MCL1
SGPL1	enzyme	0.01	BCL2L1,PTGS2
MKX	other	0.01	COL1A1,COL1A2
Presenilin	group	0.01	APP,PRNP
PF-3084014	chemical drug	0.01	MCL1,NR3C1
mir-183	microRNA	0.01	EGR1,FOXO1
TIA1	other	0.01	PTGS2,TIAL1
UBE2D1	enzyme	0.01	PTGS2,SMAD4
CMA1	peptidase	0.01	COL1A1,COL3A1
SERPINH1	other	0.01	COL1A1,COL4A2
allyl isothiocyanate	chemical toxicant	0.01	NFE2L2,PTGS2
aclarubicin	chemical drug	0.01	MCL1,PTGS2
PRKAG3	other	0.0101	AMD1,BTG2,EGR1,FTL,MAT2A,MTERFD3,NR3C1,ODC1,REV3L,RPE,SLC25A36,SLC2A3,SLC44A2,ZFP36
SYVN1	transporter	0.0105	APP,ATP6AP1,BHLHE40,F3,FASN,GGCX,GNB2,NUDT21,PPAP2B,SETX,SLC2A3,ZC3HAV1
TSC22D3	transcription regulator	0.0106	COL1A1,EGR2,EGR3,PTGS2
AZGP1	transporter	0.0106	AZGP1,BCL2L1,EGR1,MTOR
sorafenib	chemical drug	0.0106	ATG5,BCL2L1,CFLAR,MCL1
PD 153035	chemical drug	0.0106	BCL2L1,COL1A2,MCL1,PTGS2
9Z,11E-octadecadienoic acid	chemical - endogenous non-mammalian	0.0106	IL6ST,NFAT5,PTGS2,SORBS1
Tgf beta	group	0.0106	BCL2L1,BGN,BHLHE40,CFLAR,COL1A1,COL1A2,ENG,IGF1,IGFBP3,JAG1,KLF10,NEDD9,NFAT5,PPAP2B,PTGS2,RORA,SMAD4
TGFB3	growth factor	0.0109	BHLHE40,COL1A1,COL1A2,COL3A1,ELN,ENG,MGP,PALLD,TPM1
EGFR	kinase	0.011	AMD1,BCL2L1,COL1A1,COL3A1,CUL3,EGR1,ERBB2,F3,IGBP1,IGF1,IGF2,IGFBP3,JAG1,MCL1,MXI1,NFIB,PTGS2,RHOB,VCL
CD3	complex	0.0111	ATF4,BCL2L1,C1R,CFLAR,CKS1B,COX5A,CYCS,DPP4,EGR2,EGR3,FDPS,FTL,GAPDH,HIST1H2AC,IGF1,ITPR1,MDH2,NFAT5,NFE2L2,NKTR,ODC1,OGN,PDE4D,PRDX4,PSAP,PTGS2,PTP4A1,RHOC,RORA,SPOP,SRSF1,SRSF7,TARDBP,TMX3,TRA2A,UQCR11,YES1,ZFP36,ZNF33A
ITGB3	transmembrane receptor	0.0117	BCL2L1,BIRC2,COL1A1,COL1A2,LIMS1,PTGS2,SMAD3
chloroquine	chemical drug	0.0117	CTSD,FOXO1,LIFR,MAP1LC3B,PRNP
CD24	other	0.0123	ATF3,BCLAF1,DLG1,HSPB8,LPP,MTUS1,NIPBL,PTP4A1,RASA1,SFPQ
5'-methylthioadenosine	chemical - endogenous mammalian	0.0123	COL1A1,COL1A2,PTGS2
CHRM1	G-protein coupled receptor	0.0123	EGR1,EGR2,EGR3
ELK4	transcription regulator	0.0123	EGR1,EGR2,EGR3
PIK3R2	kinase	0.0123	BCL2L1,FOXO1,PIK3R1
spermidine	chemical - endogenous mammalian	0.0123	AMD1,IGFBP2,ODC1
mannose	chemical - endogenous mammalian	0.0123	ATF4,FASN,NR3C1
pregna-4,17-diene-3,16-dione	chemical - endogenous non-mammalian	0.0125	BIRC2,CFLAR,MCL1,PTGS2
fisetin	chemical toxicant	0.0125	BCL2L1,BIRC2,MCL1,PTGS2
LIPE	enzyme	0.0125	ATF3,COL1A1,COL1A2,EGR1,FASN,GAPDH,H3F3A/H3F3B,ID2,NCOA2,NET1,TKT
CD 437	chemical drug	0.0128	AP2M1,AP2S1,API5,EIF3G,F3,FTL,ODC1,PABPC1,PURB,RPL13,RPL36A/RPL36A-HNRNPH2,RPLP1,RPS10,SRSF3,TMSB10/TMSB4X,TOMM7
monocrotaline	chemical toxicant	0.0132	ATP2A2,FHL1,HSP90AB1,SMAD4,SMAD5
FOXO3	transcription regulator	0.0146	BNIP3L,CDC42EP3,CFLAR,FASN,FOXO1,GABARAPL1,GPX1,IMPDH2,JAG1,MXI1,SATB1,SMAD4
ARRB2	other	0.0146	EGR1,F3,NFKBIZ,PTGS2
LRP1	transmembrane receptor	0.0146	APP,C1R,COL3A1,PTGS2
7-ethyl-10-hydroxy-camptothecin	chemical drug	0.0146	BCL2L1,BIRC2,ERBB2,MCL1
tretinoin	chemical - endogenous mammalian	0.0146	AKR1A1,APP,ARHGAP29,ARHGEF1,ATF4,ATP2A2,BHLHE40,BIRC2,BNIP3L,BTG2,CAPN7,CEBPZ,COL1A1,COL1A2,COL3A1,COL4A2,COTL1,CRAT,CTSD,DAP3,DDX42,DPP4,EGR1,EIF5,ELN,F3,GPX1,ID2,IGF1,IGF2,IGFBP2,IGFBP3,IGFBP7,IL6ST,IMPDH2,KLF9,MEIS2,MGP,MYH9,MYO1C,MYO9A,NAE1,NCOA2,NPC2,NR3C1,OAT,ODC1,OGN,PALLD,PGD,PNRC1,PRNP,PTGS2,RNU11,RPL13,RPS19,SLC12A2,SMAD3,SMAD4,SMAD5,STARD10,TIA1,TIAL1,TMSB10/TMSB4X,TPCN1,TPM4,TPT1,UBE3…
YBX1	transcription regulator	0.0149	COL1A1,COL1A2,F3,PPP2R4,SLC2A3
RARB	ligand-dependent nuclear receptor	0.0151	BIRC2,DLG1,EGR1,IGFBP3,PTGS2,SATB1,YES1
ladostigil	chemical drug	0.0155	APP,BCL2L1,PIK3R1
miR-218-5p (and other miRNAs w/seed UGUGCUU)	mature microRNA	0.0155	COL1A1,RICTOR,VOPP1
ITGB6	other	0.0155	COL1A1,COL1A2,COL3A1
tunicamycin	chemical - endogenous non-mammalian	0.0157	ATF3,ATF4,ATP2A2,BIRC2,COL1A1,EGR1,LMAN2,MCL1,PTGS2,SEC61A1,UBXN4
cyclosporin A	biologic drug	0.016	ARHGEF1,ATF3,BCL2L1,BGN,CFLAR,COL1A1,COL4A2,EGR1,EGR2,F3,FASN,FBLIM1,HTATSF1,ITPR1,MDH2,MYH11,NFAT5,NR3C1,ODC1,PRKD3,PTGS2,SRSF1,TARDBP,TMSB10/TMSB4X,TRA2A,TUBB
ERBB2	kinase	0.016	BCL2L1,BHLHE40,BNIP2,BTG2,CKS1B,COL1A1,COL3A1,CUL3,EGR1,ERBB2,FASN,FOXO1,HIST1H4A (includes others),HSPB8,ID2,IGF2,IGFBP3,JAG1,LRRFIP1,MAOA,MXI1,NEDD9,NET1,NFIB,NPC2,PTGS2,RHOB,RPS10,SEC61A1,SMAD3,SORBS1,SPDEF,SPINT2,SRP19,TMSB10/TMSB4X,TPM1,VCL
edratide	chemical drug	0.0163	EGR2,EGR3
RNU7-1	other	0.0163	H3F3A/H3F3B,HIST1H1C
ENTPD5	enzyme	0.0163	COL1A1,COL1A2
Vla-4	complex	0.0163	BCL2L1,F3
ghrelin	chemical drug	0.0163	EGR1,FASN
MCL1	transporter	0.0163	MCL1,TPT1
RAPGEF1	other	0.0163	PTGS2,RAP1A
ENO1	enzyme	0.0163	BCL2L1,PTGS2
miR-183-5p (miRNAs w/seed AUGGCAC)	mature microRNA	0.0163	BTRC,FOXO1
miR-431-3p (miRNAs w/seed AGGUCGU)	mature microRNA	0.0163	IRAK1,TRAP1
TAB2	other	0.0163	MAP3K7,PTGS2
EFNB1	other	0.0163	BCL2L1,CFLAR
RSU1	other	0.0163	ARHGAP5,RASA1
STK17B	kinase	0.0163	BCL2L1,CFLAR
NRG1	growth factor	0.0163	ATF4,EGR1,EGR2,EGR3,ERBB2,IGF2,LIFR,MCL1,NR4A3,PTGS2,SLC2A3,VCL,ZFP36,ZNF33B
HDAC2	transcription regulator	0.0164	ATG5,COL1A2,F3,GABARAPL1,IGF1,PTGS2,RHOB
FLI1	transcription regulator	0.0164	COL1A1,COL1A2,EGR1,GNB2L1,ID2,NOLC1
TGFBR1	kinase	0.0164	BGN,COL1A1,COL1A2,JAG1,PTGS2,ZFP36
triamcinolone acetonide	chemical drug	0.0164	ATF3,BHLHE40,BTG2,EGR1,IGFBP3,IL6ST,KLF10,KLF9,NR3C1,PALLD,RHOBTB3,SFRP2,TACC2,TSPYL2,ZBTB16,ZNF189
EIF2AK3	kinase	0.0164	ATF3,ATF4,ATG5,BIRC2,BTG2,EGR1,IGF1,MAP1LC3B,ZFP36
CP-55940	chemical reagent	0.0167	BCL2L1,BTG2,ERBB2,GAPDH,RPS9
CXCR4	G-protein coupled receptor	0.0167	DPP4,EGR1,F3,ID2,ZBTB16
HRAS	enzyme	0.0169	APP,ATP2A2,BCL2L1,BTG2,CALD1,COL1A1,COL1A2,COL3A1,DMTF1,DPP4,EGR1,EIF2D,ELN,FHL1,ID2,IGF2,KLF3,KRAS,LPP,MYO1C,PLOD1,PRNP,PTGS2,RHOB,RTN4,SDHA,SESN3,SMAD3,SMAD4,SORBS1,SP3,TMSB10/TMSB4X,VCL,ZRANB1
let-7a-5p (and other miRNAs w/seed GAGGUAG)	mature microRNA	0.017	BCL2L1,COL1A1,COL1A2,EIF3J,KRAS,PRRC2A,PTGS2,RDH10,RHOB,SCYL1,SLC38A1,TAF9B
NGF	growth factor	0.0171	AGRN,APP,ATF3,BCL2L1,BTG2,EGR1,EGR2,GNB2L1,IGF2,KIF2A,LIFR,LRRFIP1,PPP2R5E,YES1
Hmga1	transcription regulator	0.0177	COL1A1,COL1A2,COL4A2,CSK,EGR1,IGF1,IGFBP3,IGFBP7,PTGS2,RHOB
SMO	G-protein coupled receptor	0.0178	ALCAM,BGN,CASC4,COL4A2,FOXF1,FZD7,SYNM
mir-10	microRNA	0.0187	ERBB2,IGF2,MTOR,SRSF1,TRA2B
SB 216763	chemical toxicant	0.0187	BHLHE40,FASN,NR4A3,PTGS2,RGS1
androgen	chemical - other	0.0188	BTG2,COL4A2,DHCR24,DNM1L,IGF1,IGFBP2,PIK3R1,PTGS2,SFRP2,SMAD3,TACC2,VMP1
prostaglandin A2	chemical - endogenous non-mammalian	0.0191	IGF1,LPAR6,NR4A3
lonafarnib	chemical drug	0.0191	BIRC2,CFLAR,PTGS2
IKK (complex)	complex	0.0191	BCL2L1,CFLAR,PTGS2
GADD45B	other	0.0191	BCL2L1,BGN,BIRC2
ACTB	other	0.0191	DSTN,MYLK,PPP1R12B
NRG2	growth factor	0.0192	EGR1,ERBB2,IGF2,LIFR,MCL1,NR4A3,ZNF33B
CREB1	transcription regulator	0.0194	ATF3,ATP6V0D1,BHLHE40,BTG2,EGR1,EGR2,FASN,MCL1,NPC2,NR4A3,PER2,PTGS2,SEC63,SFRP4,SLC2A3,SRSF10,ZFP36
Smad	complex	0.0195	COL1A1,COL1A2,ID2,MCL1
CHI3L1	enzyme	0.0195	AKAP11,BHLHE40,CALD1,SLC39A14
NFATC4	transcription regulator	0.0195	APP,COL1A1,CTSD,ITPR1
dithiothreitol	chemical reagent	0.0195	ATF3,ATP2A2,ERBB2,UBXN4
UCN-01	chemical drug	0.0195	BCL2L1,MCL1,RHOB,XPA
Calcineurin protein(s)	complex	0.0197	ATP2A2,EGR1,EGR2,ITPR1,NR4A3,PTGS2
SP1	transcription regulator	0.0201	AEBP1,ATF3,ATP2A2,BNIP3L,COL1A1,COL1A2,CTSD,DHCR24,EGR1,ENG,F3,FASN,HIST1H4A (includes others),IFITM3,IGF1,IGF2,IGFBP3,MAOA,MAT2A,MCL1,MIER1,MYH11,PSIP1,PTGS2,PTN,SLC2A3,SLC31A1,SMAD3,TEAD1
EIF2AK2	kinase	0.0206	ATF3,ATF4,BHLHE40,EGR1,NEDD9,ZC3HAV1,ZNF292,ZNF532
imatinib	chemical drug	0.0206	APP,BCL2L1,BIRC2,COL1A1,COL3A1,MCL1,MTOR,PRNP
potassium chloride	chemical drug	0.0206	ATF3,BTG2,EGR1,EGR2,NR4A3,ODC1,PIK3R1,PTGS2
plicamycin	chemical drug	0.0206	BNIP3L,COL1A1,COL1A2,F3,FASN,MAOA,SIRT1,STARD10
let-7	microRNA	0.021	BCL2L1,BTG2,CKS1B,COL1A1,ID2,KRAS,MCM7,PPP1R12B,RDH10,SMAD4
estrogen	chemical drug	0.0212	ABI2,CKS1B,COL15A1,COL1A1,COL3A1,COL4A2,CRY2,CTSD,EGR1,ERBB2,IGF1,IGF2,IGFBP2,MCM7,OAT,PTGS2,SMAD3,TMSB10/TMSB4X,ZFP36
farnesylthiosalicylic acid	chemical drug	0.0215	ATF3,ATF4,BHLHE40,KRAS,MTOR,PLOD1
PD98059	chemical - kinase inhibitor	0.0217	AMD1,ATF3,ATF4,BCL2L1,BGN,C22orf28,CFLAR,COL1A1,COL1A2,COL3A1,EGR1,EGR2,EGR3,EIF5,ELN,ENG,ERBB2,F3,FASN,IGF1,IGF2,IGFBP3,LIFR,MCL1,MYH11,PABPC1,PIK3R1,PTGS2,RGS1,SELENBP1,SMAD3,SMAD4
mir-210	microRNA	0.022	CHD9,COL4A2,CPEB2,FGFRL1,NIPBL,PSAP,SETD2,TNPO1
ATP7B	transporter	0.0231	APP,CKS1B,FASN,FDPS,HIST1H1C
PRNP	other	0.0231	APP,ATF4,CTSD,EGR1,PRNP
Ro31-8220	chemical - kinase inhibitor	0.0231	BCL2L1,COL1A1,COL1A2,EGR1,PTGS2
LIN28A	other	0.0232	KRAS,TARDBP,TIA1
GPER	G-protein coupled receptor	0.0232	EGR1,IGF1,SFRP2
MXI1	transcription regulator	0.0232	ID2,IMPDH2,ODC1
ATXN1	transcription regulator	0.0232	APP,ATP2A2,ITPR1
NDRG1	kinase	0.0232	ATF3,SMAD3,SMAD4
leupeptin	chemical - protease inhibitor	0.0232	APP,FOXO1,IGF2
KDM5B	transcription regulator	0.0234	DHCR24,EGR1,FHL1,IGFBP2,IVNS1ABP,NDE1,NEDD9,PSIP1,SMC5,SS18
mifepristone	chemical drug	0.0235	ATF3,COL15A1,CTSD,CTSF,EGR1,EGR2,F3,IGF2,IGFBP3,KRAS,NFE2L2,NR3C1,OGN,PTGS2,PTN,RHOB,RHOC,SFRP2,SFRP4
Growth hormone	group	0.0235	COL1A1,EGR1,FASN,IGF1,IGF2,IGFBP2,IGFBP3,SIRT1
Irs3	other	0.0237	EGR1,FASN
AATF	transcription regulator	0.0237	APP,FAM89B
NPAT	transcription regulator	0.0237	HIST1H4A (includes others),HIST2H2BE (includes others)
PROK1	growth factor	0.0237	MCL1,PTGS2
PAX4	transcription regulator	0.0237	BCL2L1,ID2
RNF17	other	0.0237	MXI1,ODC1
CCDC80	other	0.0237	BCLAF1,FZD7
iodoacetic acid	chemical toxicant	0.0237	ATF3,RORA
GW 5074	chemical - kinase inhibitor	0.0237	BCL2L1,PTGS2
4-nitroquinoline-1-oxide	chemical toxicant	0.0237	EGR1,PTGS2
ferric nitrilotriacetate	chemical toxicant	0.0237	BCL2L1,PTGS2
eprosartan	chemical drug	0.0237	COL1A1,COL3A1
malondialdehyde	chemical toxicant	0.0237	COL1A1,SP3
aurintricarboxylic acid	chemical drug	0.0237	APP,PTN
MDL 28170	chemical toxicant	0.0237	APP,PRNP
manganese	chemical - endogenous non-mammalian	0.0237	GAPDH,PTGS2
Ins1	other	0.0239	AP2M1,COL1A1,CRAT,EGR1,EGR2,FASN,GAPDH,IDE,IGF1,IGF2,IGFBP2,IGFBP3,IL6ST,IMPDH2,LIFR,ODC1,PIK3R1,PIKFYVE,PTGS2,SIRT1,SP3
RET	kinase	0.0252	COL1A1,COL1A2,EGR1,PRNP,PTN,REEP6,RNF11,RTN4,SYMPK
AGTR2	G-protein coupled receptor	0.0254	BCL2L1,COL3A1,FASN,PIK3R1
PRKD1	kinase	0.0254	CFLAR,F3,KIDINS220,PTGS2
IL8	cytokine	0.0258	BCL2L1,CFLAR,F3,NR3C1,PTGS2,TPM1,ZFP36
methylprednisolone	chemical drug	0.0262	ATP2A2,ATPIF1,BAIAP2,DDX3X,F3,FAAH,IGF1,IL6ST,ITPR1,IVNS1ABP,KLF9,KRAS,MAP1LC3B,MED4,MGP,NAA15,NDE1,NFE2L2,NFIA,NFIB,NOLC1,NR3C1,ODC1,PER2,PJA2,PNRC1,SCAMP1,SLC2A3,SPTBN2,TMSB10/TMSB4X,VMP1,ZFP36
Akt	group	0.0262	BCL2L1,BHLHE40,BIRC2,CFLAR,CTSD,EGR2,F3,IGF1,IGF2,IGFBP2,MCL1,NFE2L2,PTGS2,PTN,RHOB
GnRH analog	biologic drug	0.0263	ATF3,BHLHE40,CKS1B,CLOCK,CLUH,CNPY3,FOXJ3,HAUS3,HELZ,HNRPDL,HSP90AB1,ITPR1,LIMS1,NCOA6,PABPC1,PPIG,SLC2A3,SLC7A6,SMAD5,SRSF3,TPM1,VCL
TFAP2A	transcription regulator	0.0267	ERBB2,HIPK3,IGF2,PSAP,SESN3,TPM1,TPM3,XRN1
losartan potassium	chemical drug	0.0267	ARAP1,COL1A1,COL3A1,EGR1,ENG,F3,KRAS,PTGS2
EPAS1	transcription regulator	0.0273	ATG5,BHLHE40,FASN,FHL1,GPX1,HIST1H1C,HIST1H2AC,IGFBP3,ITPR1,MAFF,SLC2A3,TAF9B
GNRH1	other	0.0276	APP,EGR1,EGR2,IGF1,PTGS2,RPLP1
sulindac sulfide	chemical drug	0.0277	APP,ATF3,BCL2L1,EGR1,PIK3R1,PPP2R1A,PTGS2
Diphtheria Toxin	chemical reagent	0.0277	COL1A2,COL3A1,CTSD
LYL1	transcription regulator	0.0277	BCL2L1,BTG2,EGR1
carvedilol	chemical drug	0.0277	ATP2A2,F3,FASN
Salmonella enterica serotype abortus equi lipopolysaccharide	chemical toxicant	0.0279	ARL5B,CFLAR,EGR1,EGR3,EPM2AIP1,F3,ID2,MAFF,MAP3K4,NFKBIZ,PTGS2,RGS1,SYNPO2
SP3	transcription regulator	0.0282	AEBP1,ATF3,CD2AP,COL1A1,COL1A2,EGR1,F3,IGF1,IGF2,IGFBP3,MAT2A,MYH11,PTGS2,SLC2A3
ERBB4	kinase	0.0284	BTG2,COL3A1,EGR1,IGF2,MXI1,PTGS2,SLK,TMSB10/TMSB4X
PP1	chemical - kinase inhibitor	0.0286	BCL2L1,ERBB2,ODC1,PTGS2
S100A6	transporter	0.0286	ADAMTS1,ATF3,PRNP,TPM4
PRKAR1A	kinase	0.0286	ERBB2,RAP1A,SMAD3,TEAD1
apomorphine	chemical drug	0.0286	BCL2L1,EGR1,IL6ST,PTN
thioacetamide	chemical toxicant	0.0287	ADAMTS1,BGN,BHLHE40,COL1A1,COL1A2,COL3A1,CTSF,ELN,ERBB2,IGF1,IGFBP3,NFE2L2,ODC1,PPAP2B,PTGS2,TMC5,TMSB10/TMSB4X
NFATC3	transcription regulator	0.0298	ATF3,COL1A1,EGR2,EGR3,PRKD3,PTGS2
spironolactone	chemical drug	0.0298	COL1A1,COL1A2,COL3A1,FASN,NR3C1,PTGS2
1,2-dithiol-3-thione	chemical reagent	0.0304	AKR1A1,CLPTM1L,COQ7,CTSD,DSTN,EIF3G,GNB2L1,HSP90AB1,IDE,MCFD2,NFE2L2,PSMD4,SEC23A,SEC61A1,UBE2K
FOXO4	transcription regulator	0.0308	BCL2L1,CDC42EP3,DHCR24,FASN,JAG1
MAP2K1	kinase	0.0311	ATF3,BIRC2,CFLAR,COL1A1,COL1A2,COL3A1,DPP4,EGR2,F3,FASN,PTGS2,SMAD3
cigarette smoke	chemical toxicant	0.0316	COL4A2,EGR1,ELN,FTL,IGF1,MAFF,MAP3K4,NFE2L2,PGD,PTGS2,PTP4A1,SIRT1,TMSB10/TMSB4X
mir-181	microRNA	0.0322	APP,ATG5,CYLD,MCL1
S-adenosylmethionine	chemical - endogenous mammalian	0.0322	COL1A1,COL1A2,FASN,MAT2A
dichlorovinylcysteine	chemical toxicant	0.0322	AKR1A1,MDH2,ODC1,TUFM
MED28	other	0.0323	AEBP1,MYH11
ASCL2	transcription regulator	0.0323	CTSD,EGR1
DVL1	other	0.0323	APP,PTGS2
SLC25A4	transporter	0.0323	BCL2L1,MCL1
SNTA1	other	0.0323	IGF1,KIDINS220
TTN	kinase	0.0323	ATP2A2,FHL1
miR-320b (and other miRNAs w/seed AAAGCUG)	mature microRNA	0.0323	IGF1,MCL1
EGR4	transcription regulator	0.0323	EGR1,EGR2
PEBP1	other	0.0323	BCL2L1,CFLAR
SOAT1	enzyme	0.0323	APP,FASN
S1PR3	G-protein coupled receptor	0.0323	IGF1,PTGS2
NPAS2	transcription regulator	0.0323	CLOCK,PER2
DIABLO	other	0.0323	BIRC2,CFLAR
raclopride	chemical drug	0.0323	NR4A3,SDHA
pimozide	chemical drug	0.0323	BCL2L1,MCL1
Smad2/3-Smad4	complex	0.0326	COL1A1,COL1A2,IGFBP3
p85 (pik3r)	group	0.0326	FASN,MCL1,PTGS2
ADRB1	G-protein coupled receptor	0.0326	APP,COL3A1,IRAK1
T	transcription regulator	0.0326	ALCAM,COL1A1,MGP
PTK2B	kinase	0.0326	BCL2L1,NEDD9,VCL
thiazolidinedione	chemical drug	0.0326	NR4A3,PIK3R1,SORBS1
aldosterone	chemical - endogenous mammalian	0.0331	ADAMTS1,COL1A1,COL1A2,COL3A1,ELN,KRAS,NR3C1,PTGS2,SIRT1
ADORA2A	G-protein coupled receptor	0.0334	APP,ATP2A2,ATP6AP1,COL3A1,DSTN,EGR2,GAPDH,KIF5B,PPP2R1A,PTGS2
MYOCD	transcription regulator	0.0336	ATP2A2,CALD1,LPP,MYH11,MYLK
DCN	other	0.0336	BGN,COL1A2,ENG,ERBB2,SMAD3
nitroprusside	chemical drug	0.0336	CFLAR,EGR1,FOXO1,IGF1,PTGS2
N-acetylsphingosine	chemical reagent	0.0336	COL1A1,COL1A2,COL3A1,MAP1LC3B,PTGS2
IRAK4	kinase	0.0338	APP,ATF3,BTG2,EGR1,IDE,NFKBIZ,ZFP36
PRKCD	kinase	0.0339	BCL2L1,BIRC2,COL1A1,COL1A2,MAP1LC3B,ODC1,PTGS2,ZFP36
XBP1	transcription regulator	0.0342	APP,ATF6B,ATP2A2,FASN,GGCX,GOPC,LMAN2,MAP1LC3B,MCFD2,SEC23A,SEC61A1,SEC63,SRP19,STX5
semaxinib	chemical drug	0.0359	F3,FHL1,NFE2L2,PTGS2
CREM	transcription regulator	0.0362	ATF3,ATP2A2,BHLHE40,BTG2,COL3A1,EGR1,EGR2,IRAK1,MCL1,NPC2,RHOB
benzo(a)pyrene	chemical toxicant	0.0364	CKS1B,FASN,IGF1,ITPR1,MAFF,MAP3K2,METTL21A,NBEA,PGD,PTGS2,RHOC,SELENBP1,SFRP4,STX5,TKT
paraquat	chemical toxicant	0.0367	BCL2L1,COL1A1,ELN,GPX1,LIFR,NFAT5,NFIB,NIPBL,SIRT1
cholesterol	chemical - endogenous mammalian	0.037	AGRN,APP,ATF3,ATF4,F3,FASN,FDPS,LAPTM5,MAP1LC3B,MYH11,NR4A3,PTGS2,RPL36A/RPL36A-HNRNPH2
NCOA3	transcription regulator	0.0373	ERBB2,IGF1,IGFBP3,MCM7,MYH11,PTGS2
ARHGDIG	other	0.0379	ALCAM,HIST1H4A (includes others),PALLD
BTRC	enzyme	0.0379	BCL2L1,DLG1,SMAD4
SMARCD3	transcription regulator	0.0379	ALCAM,COL1A1,MGP
EIF2S1	translation regulator	0.0379	CFLAR,MAP1LC3B,MCL1
TBX2	transcription regulator	0.0384	ATF3,BHLHE40,CKS1B,DMTF1,FAM120B,GCFC1,MCM7
prostaglandin E2	chemical - endogenous mammalian	0.0399	ADAMTS1,APP,ATF3,BCL2L1,COL1A1,EEA1,EGR1,EGR2,ERBB2,FASN,FOXO1,IGF1,IGFBP7,MCL1,MXI1,NEDD9,PTGS2,TRAP1
ALDH1A2	enzyme	0.0399	ATF3,BGN,COL1A2,COL3A1
BCL2L1	other	0.0399	BCL2L1,BIRC2,CYCS,ITPR1
green tea polyphenol	chemical drug	0.0399	IGF1,IGFBP3,PIK3R1,PTGS2
4-methylnitrosoamino-1-(3-pyridinyl)-1-butanone	chemical toxicant	0.0399	FASN,NFE2L2,PTGS2,TKT
dimethylnitrosamine	chemical toxicant	0.0399	COL1A1,COL1A2,COL3A1,IGF2,NFE2L2
tert-butyl-hydroquinone	chemical reagent	0.0408	FTL,MYH11,NFE2L2,NUP153,PALLD,SMAD4,SNTB2
HOXA10	transcription regulator	0.0414	ATF6B,COL15A1,COL3A1,DPP4,EGR2,ID2,IGFBP3,KLF10,KLF9,LYZ,MEIS2,MYLK,PIK3R1
ganglioside GM1	chemical - endogenous mammalian	0.0419	APP,PTGS2
GCS-100	chemical drug	0.0419	BCL2L1,MCL1
SMTNL1	other	0.0419	PPP1R12A,PTGS2
EIF4G2	translation regulator	0.0419	CTSD,IGF2
PRRX1	transcription regulator	0.0419	LPP,PALLD
CXCR1	G-protein coupled receptor	0.0419	APP,BCL2L1
miR-199a-3p (and other miRNAs w/seed CAGUAGU)	mature microRNA	0.0419	MTOR,PTGS2
EIF2AK4	kinase	0.0419	ATF3,ATF4
TSG101	transcription regulator	0.0419	FAM89B,NR3C1
DEFB103A/DEFB103B	other	0.0419	BCL2L1,PTGS2
ATP7A	transporter	0.0419	APP,ELN
HPSE	enzyme	0.0419	F3,PTGS2
5-aminosalicylic acid	chemical drug	0.0419	ODC1,PTGS2
nickel chloride	chemical toxicant	0.0419	GAPDH,PTGS2
thromboxane A2	chemical - endogenous mammalian	0.0421	PTGS2
TRAPPC9	other	0.0421	BCL2L1
GŒ±q	group	0.0421	PTGS2
Timp	group	0.0421	BCL2L1
eIF2B	complex	0.0421	ATF4
Jnkk	group	0.0421	PTGS2
Max-Myc	complex	0.0421	ODC1
bapineuzumab	biologic drug	0.0421	APP
Smarcc2	transcription regulator	0.0421	NPC2
SMPD3	enzyme	0.0421	IGF1
Pad2	other	0.0421	PTGS2
SGPP1	phosphatase	0.0421	PTGS2
SPRED1	other	0.0421	KRAS
ECE2	peptidase	0.0421	APP
PRPF31	other	0.0421	MDM4
ENTPD7	enzyme	0.0421	APP
aleplasinin	chemical drug	0.0421	APP
MEX3C	other	0.0421	IGF1
LPAR5	G-protein coupled receptor	0.0421	PTGS2
SLC39A14	transporter	0.0421	IGF1
RTN3	other	0.0421	APP
RDH11	enzyme	0.0421	NR3C1
CALHM1	other	0.0421	APP
CUZD1	other	0.0421	ID2
PAP1	other	0.0421	PTGS2
RTN2	other	0.0421	APP
CYTL1	cytokine	0.0421	IGF1
PION	peptidase	0.0421	APP
ESX1	transcription regulator	0.0421	KRAS
BAHD1	other	0.0421	IGF2
CLK1	kinase	0.0421	F3
TRPC4AP	transporter	0.0421	APP
TRNAU1AP	other	0.0421	GPX1
AEN	enzyme	0.0421	MAP1LC3B
FBXL2	enzyme	0.0421	APP
CHF 5074	chemical drug	0.0421	APP
Tpl2 kinase inhibitor	chemical - kinase inhibitor	0.0421	PTGS2
MLN4924	chemical drug	0.0421	CFLAR
HCV 796	chemical drug	0.0421	MAP1LC3B
LOXL1	enzyme	0.0421	ELN
lymphokine	group	0.0421	F3
Lectin	group	0.0421	F3
Mucin	group	0.0421	PTGS2
Rho gdi	group	0.0421	RHOB
USP39	peptidase	0.0421	MDM4
SPR	enzyme	0.0421	IGF1
SPON1	other	0.0421	APP
PLSCR1	enzyme	0.0421	ITPR1
LIN7A	other	0.0421	LIN7C
NEURL	other	0.0421	JAG1
SRSF9	enzyme	0.0421	NR3C1
KLC1	other	0.0421	APP
LSM10	other	0.0421	HIST1H1C
EDN2	growth factor	0.0421	PTGS2
RRAS	enzyme	0.0421	BCL2L1
Abcb1b	transporter	0.0421	APP
PRPF8	other	0.0421	MDM4
CLK4	kinase	0.0421	F3
FBXL20	other	0.0421	APP
CHRM2	G-protein coupled receptor	0.0421	EGR1
IGFALS	other	0.0421	IGF1
miR-512-3p (and other miRNAs w/seed AGUGCUG)	mature microRNA	0.0421	CFLAR
miR-18a-3p (miRNAs w/seed CUGCCCU)	mature microRNA	0.0421	KRAS
miR-548d-3p (and other miRNAs w/seed AAAAACC)	mature microRNA	0.0421	ERBB2
mir-198	microRNA	0.0421	CCNT1
miR-139-5p (miRNAs w/seed CUACAGU)	mature microRNA	0.0421	FOXO1
mir-491	microRNA	0.0421	BCL2L1
miR-186-5p (miRNAs w/seed AAAGAAU)	mature microRNA	0.0421	FOXO1
RTN1	other	0.0421	APP
ARF3	enzyme	0.0421	APP
NACA	transcription regulator	0.0421	COL1A1
SNX17	transporter	0.0421	APP
IDE	peptidase	0.0421	APP
RPL10	other	0.0421	YES1
SIGLEC7	transmembrane receptor	0.0421	PTGS2
SIGLEC9	other	0.0421	PTGS2
Zfp157	other	0.0421	ID2
MYH10	other	0.0421	MYH9
APBA2	transporter	0.0421	APP
ITM2B	other	0.0421	APP
PTS	enzyme	0.0421	IGF1
INPP5K	phosphatase	0.0421	IGF2
TLL1	peptidase	0.0421	IGFBP3
PIK3C3	kinase	0.0421	VPS36
H19	other	0.0421	IGF2
ACSL4	enzyme	0.0421	PTGS2
CTNNA1	other	0.0421	VCL
BACE2	peptidase	0.0421	APP
QPCT	enzyme	0.0421	APP
TFF1	other	0.0421	PTGS2
RPS6KA2	kinase	0.0421	EGR1
CELF2	other	0.0421	SIRT1
WBP1	other	0.0421	MCL1
CCRN4L	transcription regulator	0.0421	IGF1
BTG1	transcription regulator	0.0421	NR3C1
NECAB3	other	0.0421	APP
ADAM19	peptidase	0.0421	EGR2
CYFIP2	other	0.0421	KRAS
ITM2C	other	0.0421	APP
LIN7B	other	0.0421	LIN7C
UBL5	other	0.0421	MDM4
NDUFS1	enzyme	0.0421	GPX1
DECR1	enzyme	0.0421	ERBB2
SHC3	other	0.0421	APP
CNTNAP1	other	0.0421	APP
3-mercaptopicolinic acid	chemical - kinase inhibitor	0.0421	NR3C1
nitroaspirin	chemical drug	0.0421	F3
MW-III-36C	chemical - protease inhibitor	0.0421	APP
meclofenamic acid	chemical drug	0.0421	APP
diflunisal	chemical drug	0.0421	APP
LY311727	chemical reagent	0.0421	PTGS2
BN 50730	chemical reagent	0.0421	PTGS2
cyclothiazide	chemical drug	0.0421	EGR1
trichloroacetic acid	chemical drug	0.0421	MCL1
1-(1-glycero)dodeca-1,3,5,7,9-pentaene	chemical toxicant	0.0421	PTGS2
CGP77675	chemical - kinase inhibitor	0.0421	PTGS2
donepezil	chemical drug	0.0421	APP
IC261	chemical - kinase inhibitor	0.0421	APP
Ro 31-7549	chemical - kinase inhibitor	0.0421	PTGS2
MT-21	chemical drug	0.0421	CYCS
bisindolylmaleimide III	chemical - kinase inhibitor	0.0421	CFLAR
terpenoid	chemical - endogenous non-mammalian	0.0421	NFE2L2
homoharringtonine	chemical drug	0.0421	MCL1
theobromine	chemical drug	0.0421	FAM89B
4-hydroxymercuribenzoate	chemical - protease inhibitor	0.0421	COL1A1
n-6 docosapentaenoic acid	chemical - other	0.0421	PTGS2
NADP	chemical - endogenous mammalian	0.0421	F3
pectin	chemical - endogenous non-mammalian	0.0421	SMAD3
glycan	chemical - other	0.0421	F3
dihydroxyacetone	chemical - endogenous mammalian	0.0421	NR3C1
prostratin	chemical - endogenous non-mammalian	0.0421	SIAH1
sodium acetate	chemical drug	0.0421	MPDZ
BMP2	growth factor	0.043	BCL2L1,BHLHE40,CLIC4,COL1A1,COL1A2,F3,FOXO1,ID2,KLF10,KLF9,NFAT5,SMAD4,ZBTB16
AGN194204	chemical drug	0.0432	ATF3,BNIP3L,CLIC4,COTL1,FDPS,FNBP1,GAPDH,GNB2,HIST1H1C,LIFR,NPC2,PRNP
ZBTB20	other	0.0433	FASN,IGF1,IGFBP2,NEDD9,NR3C1
ETS	group	0.0436	EGR1,ENG,ERBB2
miR-24-3p (and other miRNAs w/seed GGCUCAG)	mature microRNA	0.0436	SMAD3,SMAD4,SMAD5
FBN1	other	0.0436	COL1A2,COL3A1,COL4A2
SMARCE1	transcription regulator	0.0436	CTSD,CYLD,NPC2
CEP-1347	chemical drug	0.0436	ATF4,BIRC2,PTGS2
ITGAV	ion channel	0.0441	BCL2L1,BIRC2,COL1A1,COL1A2
F7	peptidase	0.0441	EGR1,F3,JAG1,ZFP36
niacinamide	chemical - endogenous mammalian	0.0441	FASN,GAPDH,PTGS2,SIRT1
PRKCA	kinase	0.0446	APP,BCL2L1,BNIP3L,EGR1,ERBB2,PTGS2,RHOBTB3,SCAMP1
HOXD10	transcription regulator	0.0458	DIS3,MAGED2,NCS1,RHOB,RHOC,USP15
gentamicin	chemical drug	0.0464	ALCAM,ATF3,BTG2,CTSD,DPP4,EGR1,HNRNPU,IGFBP3,KIAA1737,NAA15,PNN,PTN,PTP4A1,SFPQ,TUBB,ZRANB2
PTK2	kinase	0.0468	BIRC2,COL1A1,COL1A2,LPP,PALLD
nitrofurantoin	chemical drug	0.0485	ADAMTS1,AMD1,BCL2L1,BTG2,ERBB2,IGF1,IGFBP3,ODC1,RPL13,RPS9,SELENBP1,TUBB
2-methoxyestradiol	chemical - endogenous mammalian	0.0486	ATF3,F3,MCL1,PTGS2
BMS-690514	chemical drug	0.0486	CTSF,CYCS,MCL1,MCM7
SMAD1	transcription regulator	0.0486	BCL2L1,BTG2,COL1A1,COL1A2
mir-182	microRNA	0.0486	FOXO1,LRP6,MALAT1,RASA1
ANGPT1	growth factor	0.0486	ALCAM,BCL2L1,COL3A1,JAG1
cerivastatin	chemical drug	0.0486	COL1A1,F3,FDPS,GPX1,NET1,PTGS2,TMSB10/TMSB4X
GH1	growth factor	0.0487	AKR1A1,ATF4,COL3A1,EGR1,FASN,FDPS,ID2,IGF1,IGFBP3,SATB1,SIRT1,TAF9,TKT,VEZF1
CD247	transmembrane receptor	0.0489	HTATSF1,ITPR1,NKTR,SPOP,TARDBP,TRA2A
PSEN1	peptidase	0.0491	APP,ATP2A2,C1R,DNM1L,DPY19L3,DSTN,EGR1,GAPDH,H2AFJ,HNRNPA3,IDE,IGF1,KIF5B,LATS1,MAP1LC3B,PIK3R1,PTGS2,PTPRF,RHOQ,TPM3,TPT1,TUBB,TUFM
dacinostat	chemical drug	0.0498	BCL2L1,CFLAR,ERBB2
MAP2K5	kinase	0.0498	MEF2A,NR4A3,PTGS2
ZBTB17	transcription regulator	0.0498	BHLHE40,EGR1,ZFP36
sucrose	chemical - endogenous mammalian	0.0498	APP,FASN,MPDZ
