# Supplementary material for: Global Transcriptome Analysis of Formalin-Fixed Prostate Cancer Specimens Identifies Biomarkers of Disease Recurrence
Source: Oxford University Press journal article supplement (doi:10.1158/0008-5472.can-13-2699), 2014-04-09
Supplement: 00085472can132699-sup-tab9.xlsx [file 00085472can132699-sup-tab9.xlsx]

## Sheet: Supplementary Table 9
Supplementary Table 9: Set of 304 genes differentially expressed between Gleason 3+4 pattern and Gleason 4+3 pattern patients based on DEseq analysis (p < 0.05).
Symbol	Avg G3+4	Avg G4+3	foldChange G4+3/G3+4	log2FoldChange	p-value
MIR10A	0	0.934545	Inf	Inf	0.0444359
PAEP	0.623957	6.78961	10.8815	3.44381	0.0496047
KIF12	26.9429	145.832	5.41262	2.43633	0.0431517
UNC5A	22.7457	112.461	4.9443	2.30577	0.0239678
AGBL1	5.02099	24.2876	4.83721	2.27418	0.0145247
NF1P2	3.67051	17.4881	4.76448	2.25232	0.00740528
NBEAP1	9.90354	45.1891	4.56293	2.18996	0.0440741
FLJ40288	0.379948	1.42824	3.75904	1.91036	0.0380825
LOC348120	13.9443	51.9693	3.72692	1.89798	0.00411991
FAM22F	1.14162	4.23909	3.71324	1.89268	0.0163936
EEF1A2	39.6229	143.154	3.61291	1.85316	0.00365828
POTEKP	29.8333	105.98	3.55239	1.82879	0.0367731
SYT4	9.36856	32.59	3.47865	1.79853	0.0483903
ELFN2	65.7682	219.171	3.33247	1.73659	0.00199122
MIR99A	1.17551	3.80806	3.2395	1.69577	0.0461
HOTAIR	3.11029	9.96497	3.20387	1.67982	0.0273413
MT1F	11.2157	34.7838	3.10136	1.6329	0.0277188
KCTD8	4.06959	12.1086	2.97539	1.57308	0.0429138
FGF12	17.2185	49.5676	2.87875	1.52544	0.0223215
ODZ1	454.828	1305.61	2.87056	1.52133	0.000483872
UGT1A3	1.55651	4.41598	2.83711	1.50442	0.036727
UGT1A1	0.89868	2.43113	2.70522	1.43575	0.0490865
KCNJ6	2.42013	6.50088	2.68618	1.42555	0.00543963
C2orf27A	3.43402	8.64239	2.5167	1.33153	0.0246625
POTEF	293.381	737.682	2.51441	1.33022	0.0198121
POTEE	256.36	627.947	2.44947	1.29247	0.0153604
CAPN8	5.32057	12.9516	2.43425	1.28348	0.0149004
CYP2U1	77.6097	188.001	2.42239	1.27643	0.0143075
KCNJ3	10.8184	26.0688	2.40969	1.26885	0.0364617
TWIST1	15.5524	37.3465	2.40134	1.26384	0.0294701
LOC440905	378.21	907.462	2.39936	1.26265	0.0160914
PCDHA11	10.7395	25.7544	2.3981	1.26189	0.0214273
CCDC141	41.1159	97.511	2.37161	1.24587	0.00232913
SLC36A1	260.075	610.375	2.34692	1.23077	0.0401645
LOC440910	197.041	458.419	2.32652	1.21817	0.0395596
LOC727924	5.91513	13.7556	2.32549	1.21753	0.0255859
ADAMTSL1	100.901	231.637	2.29568	1.19892	0.00251857
RNASE13	1.47122	3.35894	2.2831	1.191	0.0481926
MESP1	46.5524	104.381	2.24223	1.16493	0.0414286
HOXC11	2.04208	4.57059	2.2382	1.16234	0.0429147
WIF1	11.1255	24.0186	2.15887	1.11028	0.0140168
MAOA	305.023	654.982	2.14732	1.10254	0.00889041
MT1G	18.4145	39.079	2.12219	1.08555	0.0384357
STON2	163.671	344.448	2.10451	1.07349	1.48e-05
HS3ST1	19.1129	39.9921	2.09242	1.06517	0.0278745
HS3ST4	14.0895	29.1283	2.06738	1.0478	0.0151071
IRX5	12.8547	26.2797	2.04436	1.03165	0.00277952
FAM155B	18.9395	38.5327	2.03452	1.02469	0.0436427
KCTD16	6.58401	13.0631	1.98406	0.988457	0.0231622
HOXC6	29.9584	58.4538	1.95117	0.964337	0.00142516
CDKN2C	15.1681	29.0111	1.91263	0.93556	0.0126615
ESPN	15.9896	30.3327	1.89702	0.923736	0.0224502
CYP4F30P	413.658	784.12	1.89557	0.922635	0.0495784
TTN	2169.56	4042.31	1.86319	0.897776	0.00378242
GATA2	296.842	552.295	1.86057	0.895742	0.0313309
HOXC5	10.7883	19.9099	1.8455	0.884014	0.0314581
PIRT	9.31479	17.1693	1.84323	0.882237	0.00632353
PTGFR	21.2482	38.7998	1.82603	0.868711	0.00904305
TP73	20.1906	36.765	1.82089	0.864646	0.0372358
TCERG1L	6.70805	12.1429	1.8102	0.856148	0.03811
PPFIBP2	111.972	195.903	1.74957	0.807002	0.00613908
ALOX12B	77.5444	135.514	1.74757	0.805352	0.0406914
SLC4A4	1235.87	2155.43	1.74406	0.802451	0.0339937
ASCL1	2.23307	3.83577	1.71771	0.780487	0.0474122
HOXC10	2.11819	3.6348	1.71599	0.779045	0.0334963
SLC9A2	109.249	187.308	1.71451	0.7778	0.025469
FAT2	134.267	229.401	1.70854	0.772767	0.0039422
HOXC8	3.03206	5.17904	1.70809	0.772388	0.0394264
TBL1Y	31.9021	52.7244	1.65269	0.724819	0.018885
LOC642426	12.7018	20.9755	1.65138	0.723675	0.0468804
LAT2	40.6805	67.1179	1.64988	0.722361	0.0400578
RASAL2	240.927	393.112	1.63166	0.70634	0.0335416
FIBIN	62.1617	100.954	1.62405	0.699595	0.00961186
SEMA4G	87.8123	142.209	1.61946	0.695514	0.0397394
C10orf107	14.2859	23.1344	1.61939	0.695448	0.0202055
WTH3DI	30.5449	49.3188	1.61463	0.691208	0.0207371
PEX11A	25.691	41.3779	1.6106	0.687595	0.0100594
CYP4F11	77.3759	123.929	1.60165	0.679557	0.00445674
GRHL3	12.957	20.5394	1.5852	0.664666	0.0330746
CXCL12	139.923	221.45	1.58266	0.662355	0.01711
HOXB2	15.4417	24.3984	1.58004	0.659957	0.0473283
SLC39A10	219.987	346.179	1.57363	0.6541	0.049832
RCAN3	216.914	339.263	1.56404	0.645281	0.0320828
NDUFB9	64.7085	99.7607	1.5417	0.624518	0.0324309
PKIB	14.5127	22.3201	1.53797	0.621024	0.0284202
LOC100132891	21.0312	32.2349	1.53272	0.616094	0.030513
OSR2	68.0354	104.035	1.52914	0.612718	0.0257987
LRRTM4	8.39205	12.828	1.52858	0.612195	0.0136076
RIC8B	90.8378	135.49	1.49156	0.576824	0.0162653
GUCY1A2	198.72	295.584	1.48744	0.572834	0.0275214
MYEOV2	22.4791	33.0653	1.47094	0.556735	0.0347386
AR	770.99	1133.18	1.46977	0.555591	0.0357225
TMCC3	98.3906	144.244	1.46603	0.551915	0.00480672
THRB	169.506	247.158	1.45811	0.5441	0.0324298
ADH6	24.5045	35.1677	1.43516	0.521207	0.0187875
DEGS1	130.944	187.76	1.4339	0.51994	0.0185507
GLRX2	28.651	41.0559	1.43296	0.519002	0.035197
ADCY9	86.8868	124.415	1.43192	0.517948	0.0356523
RFC3	27.4653	39.1452	1.42526	0.511224	0.0355908
SORD	1090.22	1550.11	1.42183	0.507749	0.0469164
TBX3	1055	1492.45	1.41464	0.500435	0.0386305
LINC00478	298.659	419.742	1.40542	0.491006	0.0130674
LOC283392	17.1031	23.9162	1.39835	0.483726	0.0484763
COX6A1	95.9373	134.148	1.39829	0.483665	0.0329815
LMO3	73.81	103.19	1.39805	0.483414	0.022645
ADH1A	11.4376	15.495	1.35474	0.438016	0.0229043
WNT5A	85.8596	115.76	1.34825	0.431091	0.0404563
COL5A2	295.26	396.782	1.34384	0.42636	0.0223763
SLITRK6	18.4447	24.6247	1.33506	0.416904	0.0367775
FGF9	8.67028	11.538	1.33075	0.412242	0.0494793
CBLL1	149.01	198.01	1.32883	0.410157	0.0374443
FECH	179.882	238.754	1.32728	0.408468	0.0286822
KCNJ2	28.2021	37.0914	1.3152	0.395285	0.0340728
ASPN	76.0264	98.8663	1.30042	0.378979	0.00726349
HOXA13	127.656	164.321	1.28722	0.364259	0.0251357
FRY	249.195	319.258	1.28116	0.357447	0.046494
NREP	156.052	199.434	1.278	0.353885	0.025566
COX6C	65.6345	82.5374	1.25753	0.330594	0.0261784
FBLN5	139.138	174.681	1.25545	0.328204	0.0464294
CEACAM22P	141.156	176.701	1.25181	0.324013	0.0494378
NR2F2	459.51	575.105	1.25156	0.32373	0.034036
MAF	265.916	332.619	1.25084	0.322897	0.0340248
SGCD	156.373	194.967	1.2468	0.318236	0.039605
MAGI3	222.883	276.559	1.24082	0.311296	0.0483812
LOC100505678	173.5	213.808	1.23232	0.30138	0.030814
EDNRA	208.332	255.558	1.22669	0.29477	0.0475636
SPATA6	89.0589	109.078	1.22479	0.292534	0.0188162
SH3BGR	18.1278	22.1392	1.22128	0.288395	0.032982
C2orf54	12.7716	15.5783	1.21976	0.286598	0.0344496
DNM3OS	102.472	120.073	1.17177	0.228683	0.0338185
RUNX1T1	132.961	152.788	1.14912	0.20053	0.0481409
DNM3	57.8882	64.8521	1.1203	0.163884	0.0463135
MFAP5	36.1399	40.4236	1.11853	0.161607	0.0234465
RORC	177.457	152.56	0.859701	-0.218093	0.0245049
BHLHE40	1406.08	1140.76	0.811303	-0.301687	0.0427859
HKR1	583.969	469.835	0.804554	-0.313739	0.0320746
ATP1A1	1024.93	823.86	0.803818	-0.315058	0.0186414
FOXO3	675.827	540.96	0.800441	-0.321133	0.0391756
STK39	412.244	324.722	0.787693	-0.344294	0.0310291
LNX1	56.9067	44.7956	0.787176	-0.345242	0.0418295
MGC16025	36.0482	28.1379	0.780565	-0.357409	0.042077
ITPRIP	233.73	182.405	0.780409	-0.357698	0.0267608
TPT1	4212.62	3282.2	0.779135	-0.360054	0.0424669
SMPD3	112.487	86.9945	0.773373	-0.370764	0.0351897
IFNGR2	202.6	155.339	0.766726	-0.383216	0.0272854
2013-09-09	868.549	664.128	0.764641	-0.387146	0.013419
FAM171A1	126.031	95.9477	0.761302	-0.393459	0.0386778
IFNGR1	170.115	129.212	0.759558	-0.396768	0.0403512
CSDA	483.692	367.149	0.759056	-0.397722	0.049917
TGM2	1011.97	767.66	0.758576	-0.398634	0.0315988
TGIF1	265.143	200.436	0.755953	-0.403632	0.0413634
PCDHB11	36.3738	27.3782	0.75269	-0.409872	0.03284
WNT5B	76.0675	57.0076	0.749434	-0.416126	0.0290605
RALGAPA2	1641.65	1227.91	0.747974	-0.418941	0.0385017
ZFP36	4833.17	3612.77	0.747494	-0.419865	0.024781
PPM1B	424.604	316.261	0.744836	-0.425006	0.0295276
GDE1	323.192	240.445	0.743969	-0.426685	0.0179363
STYXL1	68.5949	50.9669	0.743014	-0.42854	0.0421746
AIM1	1089.24	809.029	0.742744	-0.429062	0.0142574
PREP	89.3293	65.9362	0.738126	-0.438062	0.032375
DND1	49.1068	36.1803	0.736768	-0.440718	0.0279706
DDX21	585.499	430.948	0.736036	-0.442152	0.0429504
EML4	447.593	325.798	0.727889	-0.458209	0.0210021
NEAT1	41437.4	30115.9	0.726781	-0.460408	0.041875
GALNTL4	69.7377	50.4728	0.723753	-0.466431	0.00657818
THSD1P1	207.189	148.939	0.718857	-0.476222	0.0299077
MCL1	3911.46	2802.08	0.716378	-0.481207	0.0320423
PSD3	435.975	312.065	0.715786	-0.482399	0.0369679
TIPARP	508.525	363.528	0.714868	-0.484252	0.0267498
PCDHGB1	38.2384	27.2479	0.71258	-0.488877	0.0409141
FNIP2	553.294	393.438	0.711082	-0.491911	0.0222301
PXDN	476.949	337.568	0.707766	-0.498655	0.0122815
ATF3	1106.69	782.268	0.706856	-0.500511	0.0403762
SH3RF1	715.836	505.277	0.705857	-0.502553	0.0331
SFMBT2	296.68	209.367	0.705701	-0.50287	0.0469028
KLF2	343.51	242.04	0.70461	-0.505104	0.0433757
CENPN	373.839	262.451	0.702043	-0.510369	0.0189079
KIF13B	704.535	492.608	0.699196	-0.516231	0.033389
KIAA1324	1029.15	718.675	0.698319	-0.518043	0.00354192
STYK1	83.3342	58.1383	0.697652	-0.519421	0.0194483
ATP1A1OS	66.8802	46.6039	0.696827	-0.521128	0.0265647
RDH10	284.839	197.441	0.693165	-0.528729	0.031447
SEL1L3	268.077	185.706	0.692732	-0.52963	0.0140114
C2	77.2472	53.4231	0.691587	-0.532018	0.0412129
BTG2	2300.89	1581.97	0.687548	-0.540467	0.0311325
INTS10	233.198	159.635	0.684548	-0.546776	0.00812518
AMPD3	218.096	149.285	0.684495	-0.546888	0.00687252
TAP2	144.289	98.7164	0.684156	-0.547602	0.0222506
CHD1	526.073	359.868	0.684065	-0.547795	0.0405854
SAT1	983.732	672.046	0.68316	-0.549705	0.00704559
ATP10A	65.8481	44.8917	0.681746	-0.552694	0.0289852
SERGEF	82.9308	56.4766	0.681008	-0.554256	0.00338752
ADCY1	256.049	174.34	0.680885	-0.554517	0.0126128
NDRG1	2642.71	1791.76	0.678001	-0.560641	0.00217313
PCDHGB3	59.8031	40.5438	0.677955	-0.560739	0.0262662
CA5B	296.362	200.074	0.675099	-0.566829	0.021005
STK17B	349.835	235.885	0.674274	-0.568592	0.00995292
RGS17	40.605	27.2978	0.672278	-0.572871	0.0483811
FMN1	279.906	186.944	0.66788	-0.582339	0.00407827
THSD1	24.0884	16.0858	0.667782	-0.582551	0.0401613
TMC5	1046.78	694.625	0.663585	-0.591646	0.0355459
SOX9	573.097	379.926	0.662935	-0.59306	0.0340557
IL15RA	28.4569	18.852	0.662476	-0.59406	0.0484276
SH2D2A	30.4689	20.0696	0.658691	-0.602325	0.0475197
AGPAT5	112.566	74.0575	0.657904	-0.604051	0.0203959
SH3RF2	46.3394	30.44	0.656891	-0.606273	0.0129902
MYO1G	39.3406	25.7338	0.654129	-0.612354	0.0194989
PIK3R5	41.3567	27.0344	0.653688	-0.613325	0.0262164
DLEC1	56.7266	36.9784	0.651871	-0.617341	0.00723529
LACC1	103.811	67.5518	0.650718	-0.619896	0.0394908
MTUS1	891.722	577.779	0.647937	-0.626075	0.00156799
EFCAB4B	154.805	100.254	0.647612	-0.626799	0.000785553
RUNX3	48.6322	31.4433	0.646554	-0.629158	0.0335464
APOL3	87.1194	56.222	0.645345	-0.631858	0.0140886
SLC39A14	260.218	167.887	0.645176	-0.632235	0.00632644
CSGALNACT1	657.154	423.797	0.644898	-0.632856	0.0184118
BDKRB2	82.2918	53.0668	0.644862	-0.632939	0.0413933
ST6GAL1	592.3	376.243	0.635224	-0.654664	0.00772587
PPAP2A	502.085	318.697	0.634747	-0.655746	0.0214345
TNFAIP3	450.012	283.09	0.629071	-0.668705	0.0422281
ISG20	34.319	21.5082	0.626714	-0.67412	0.0338595
PKDCC	66.0079	41.3525	0.626477	-0.674666	0.0266895
TBX1	58.7474	36.5214	0.621669	-0.685782	0.0119996
TOX3	51.8428	32.1693	0.620515	-0.688461	0.0170989
LOC100505989	188.863	117.163	0.62036	-0.688821	0.0211169
SLC7A2	576.67	357.385	0.61974	-0.690266	0.00408109
PIGA	138.083	85.5547	0.619591	-0.690613	0.043879
ATP11A	456.868	282.736	0.618857	-0.692321	0.00251166
SLC12A2	817.746	505.694	0.618399	-0.693389	0.024173
GBP3	124.115	76.5067	0.616416	-0.698024	0.0414729
HS6ST2	25.5333	15.6488	0.612877	-0.70633	0.0437527
ESRRG	126.898	77.4263	0.610147	-0.712771	0.00225589
MAFF	776.388	472.829	0.609012	-0.715458	0.0252782
MCOLN2	40.2032	24.2988	0.604399	-0.726426	0.0305878
LAMC2	206.958	123.753	0.597965	-0.741867	0.0194226
FGR	32.8985	19.6599	0.597593	-0.742764	0.0399528
B3GAT1	125.475	74.9416	0.597263	-0.743562	0.00577487
PDE8B	249.174	148.556	0.596193	-0.746149	0.00158119
GABRB3	146.469	87.0125	0.594068	-0.751301	0.0475632
FRK	82.3496	48.5131	0.589112	-0.763386	0.00844825
GGT1	135.259	79.3271	0.586484	-0.769837	0.00376083
MTMR7	55.4459	32.4774	0.585749	-0.771646	0.0140041
CPNE8	40.8525	23.8977	0.584975	-0.773554	0.0340978
B3GNT5	219.036	127.054	0.58006	-0.785725	0.0230188
PART1	296.728	171.382	0.577572	-0.791928	0.0471339
COL22A1	121.539	69.5804	0.572494	-0.804667	0.0358818
RGS2	309.121	176.105	0.569697	-0.811733	0.0246202
EPHA5	45.0149	25.5063	0.56662	-0.819545	0.0469686
SLC5A1	88.0459	49.5147	0.562374	-0.830398	0.0160554
STEAP4	2189.87	1225.66	0.559696	-0.837285	0.0302073
SLC26A2	583.605	322.509	0.552615	-0.855653	0.0149199
EGF	66.5136	36.7324	0.552255	-0.856595	0.0340717
KCNS3	47.5478	26.0596	0.54807	-0.867567	0.0214697
ARL5B	297.505	163.038	0.548018	-0.867704	0.0449037
LUZP2	342.572	187.419	0.547093	-0.870142	0.0481518
MGC12916	22.2134	12.0215	0.541182	-0.885813	0.0163169
SNORD58A	37.4047	20.1752	0.539376	-0.890638	0.0474268
C10orf10	310.357	167.339	0.539182	-0.891154	0.006794
AMD1	2264.42	1203.1	0.531305	-0.912389	0.0227781
ADARB2	66.2986	35.0322	0.528401	-0.920295	0.0198083
OGDHL	27.8278	14.6132	0.525128	-0.92926	0.0425077
ODC1	1120.5	584.308	0.521469	-0.939347	0.00114243
TDRD1	154.731	80.6307	0.521104	-0.940358	0.0242622
IL8	59.7637	30.9571	0.517992	-0.948997	0.018498
PRF1	13.1355	6.67306	0.508018	-0.97705	0.0410501
KCNN4	127.771	64.6876	0.506276	-0.982005	0.00365657
RNF138P1	2536.38	1283.62	0.506083	-0.982554	0.0307431
TMEM178	121.115	60.2148	0.497171	-1.00819	0.00424016
IL7R	62.173	30.7792	0.495057	-1.01433	0.0249688
CCR4	13.1065	6.44408	0.491672	-1.02423	0.0291903
SYT13	64.5207	31.466	0.487689	-1.03597	0.000865071
LOC439949	16.2018	7.79934	0.481388	-1.05473	0.0492609
HLA-DMB	94.875	45.5087	0.47967	-1.05989	0.0295985
SOD2	1272.42	603.175	0.474039	-1.07692	0.00726408
SNORA80B	56.5068	26.5126	0.469193	-1.09175	0.00479694
PABPC1L2B	14.2999	6.58226	0.4603	-1.11935	0.0119574
SECTM1	50.6064	23.2171	0.458778	-1.12413	0.046406
SLC6A14	69.6219	31.8679	0.457728	-1.12744	0.0233924
CD7	11.745	5.27304	0.44896	-1.15534	0.0447624
LOC100294145	123.719	54.3861	0.439594	-1.18576	0.0152039
SLC5A8	13.5018	5.90906	0.437651	-1.19215	0.0148245
CRYBA2	14.6366	6.29724	0.430239	-1.21679	0.023272
GPR171	24.6744	10.3373	0.418947	-1.25516	0.0112023
KCNG3	112.273	45.9367	0.409152	-1.28929	0.0469552
KCNH8	119.68	48.4785	0.405067	-1.30377	0.0214911
SHH	9.82064	3.93703	0.400893	-1.31871	0.0111442
DACT2	64.6717	25.7089	0.39753	-1.33086	0.0192092
LOC285889	67.969	25.8394	0.380164	-1.39531	0.0448296
C8orf4	898.836	309.52	0.344357	-1.53802	4.87e-05
FAM21B	11.7299	3.62282	0.308853	-1.69501	0.00700136
ERG	903.155	273.497	0.302824	-1.72345	0.00693517
ADARB2-AS1	9.48146	2.6361	0.278027	-1.8467	0.042054
MDFI	54.5682	13.737	0.251739	-1.99	9.54e-05
OR52N4	12.1884	2.90246	0.238133	-2.07016	0.0198111
OR56B1	6.94991	1.63957	0.235912	-2.08368	0.0332385
LOC100131234	4.75428	1.07725	0.226585	-2.14187	0.0408681
GLDC	25.551	5.78658	0.226472	-2.1426	0.000365011
GCNT3	5.13344	0.9915	0.193145	-2.37224	0.0381456
LOC644172	42.7398	7.69537	0.180052	-2.47352	0.00843039
OR52E4	5.67842	0.730513	0.128647	-2.95851	0.0418093
MIR4791	2.01461	0.226103	0.112232	-3.15545	0.0415155
CYP2C19	2.99617	0.0424552	0.0141698	-6.14103	0.0355531
OR4A47	1.80762	0	0	na	0.0353365
OR4F6	1.33615	0	0	na	0.0486238
